# Supplementary material for: Cry Toxins Use Multiple ATP-Binding Cassette Transporter Subfamily C Members as Low-Efficiency Receptors in Bombyx mori
Source: MDPI journal article supplement (doi:10.3390/biom14030271), 2024-02-23

**Supplementary Figure 4. Domain prediction of BmABC transporters defined in this study using InterPro.**

# ABCA3

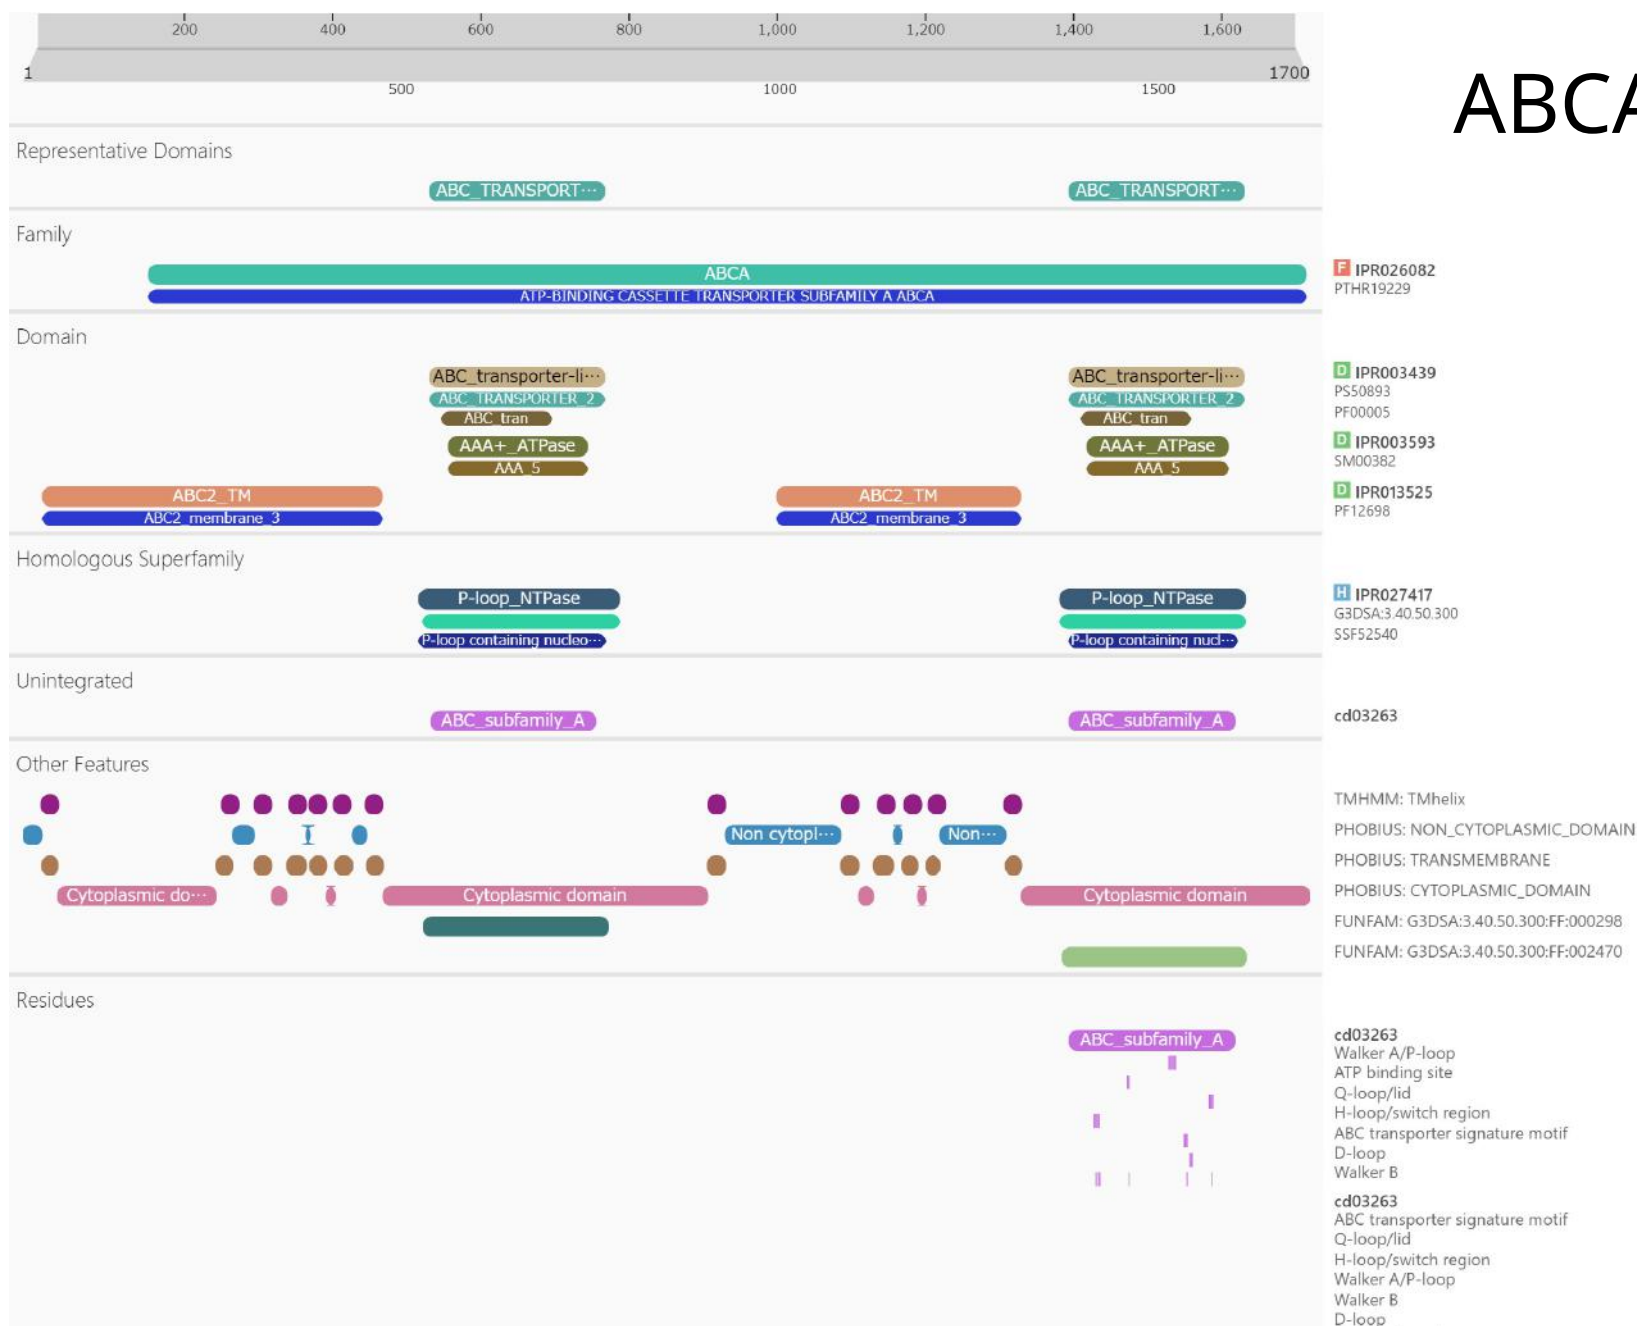

# ABCA2

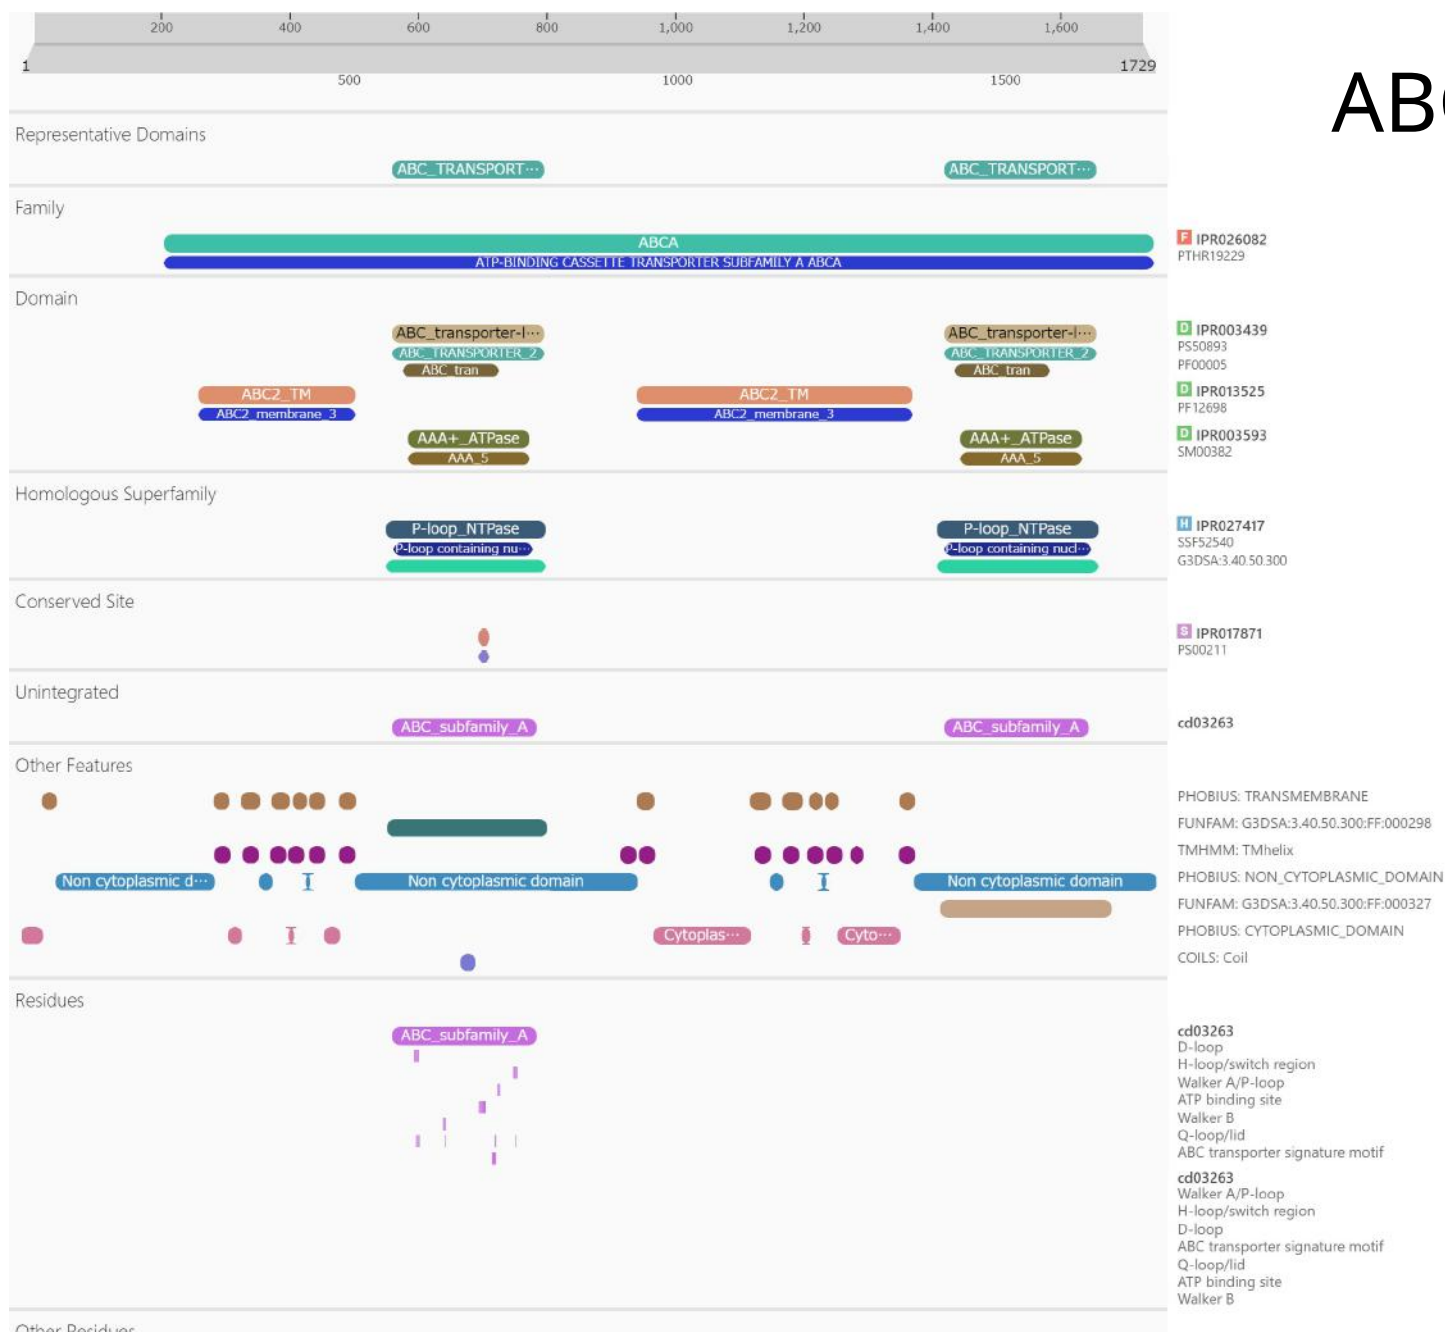

# ABCA4

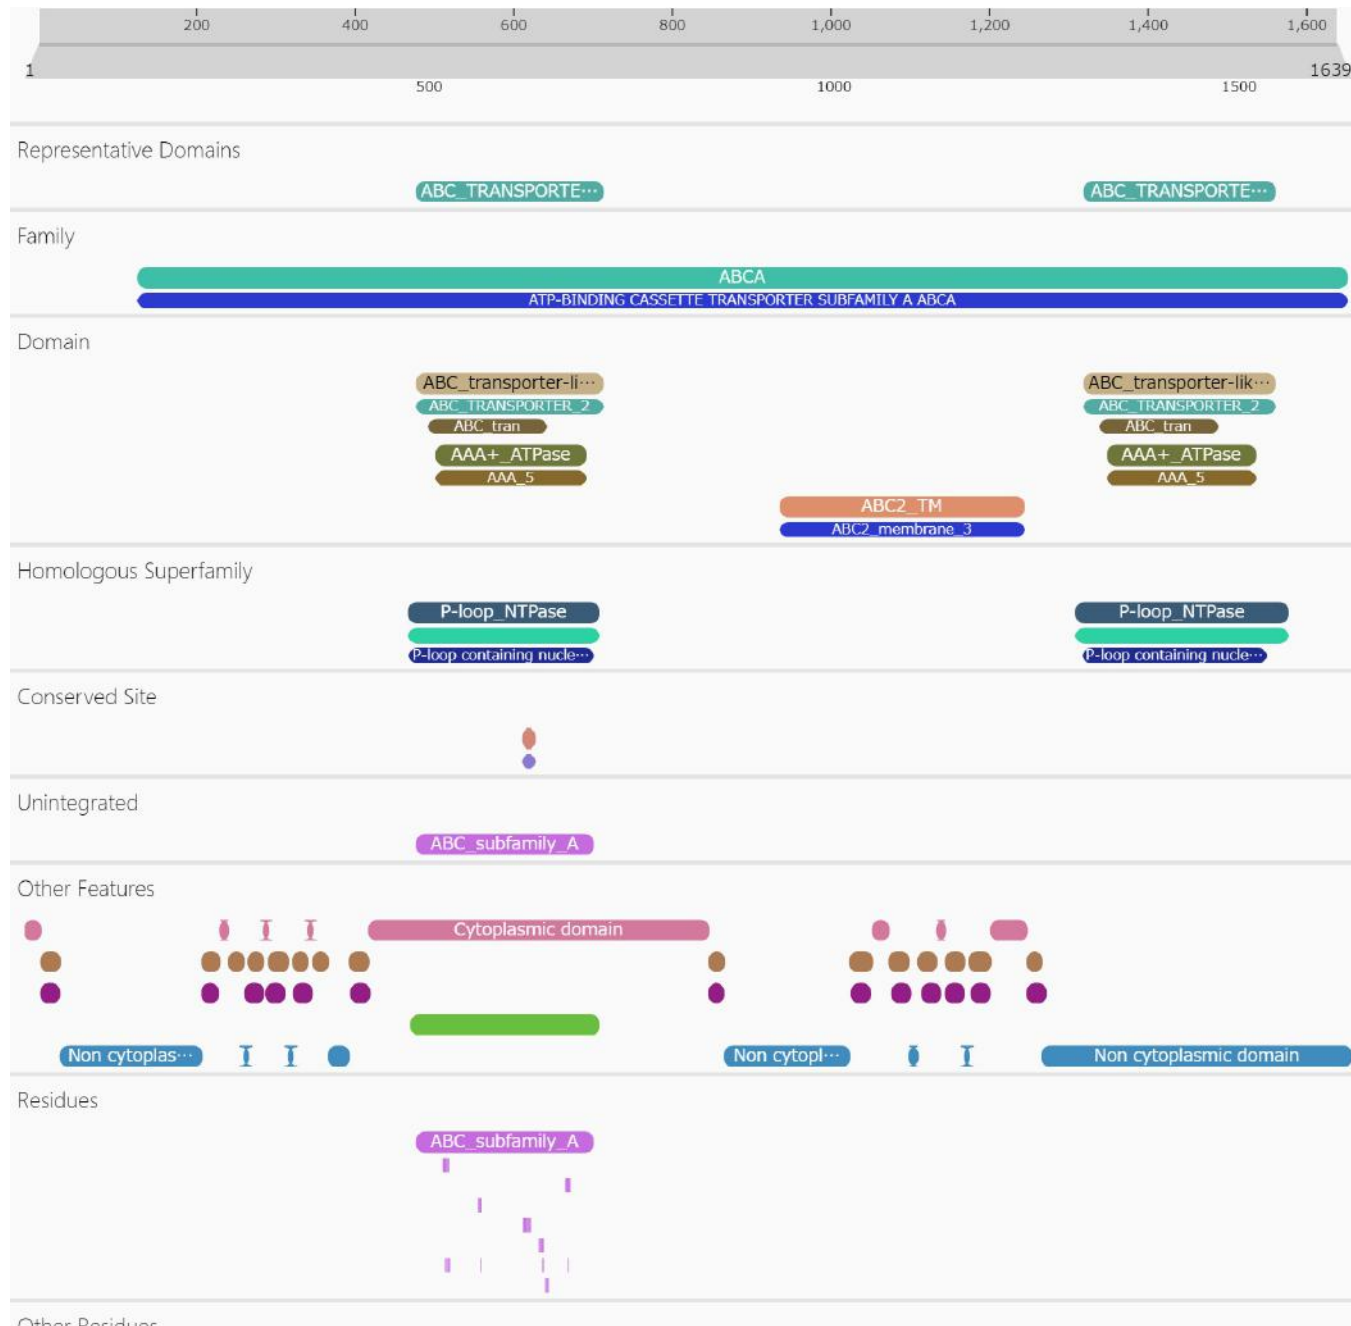

**F** IPR026082  
PTHR19229

**D** IPR003439  
PSS0893  
PF00005

**D** IPR003593  
SM00382

**D** IPR013525  
PF12698

**H** IPR027417  
G3DSA:3.40.50.300  
SSF52540

**S** IPR017871  
PS00211

cd03263

PHOBIUS: CYTOPLASMIC\_DOMAIN

PHOBIUS: TRANSMEMBRANE

TMHMM: TMhelix

FUNFAM: G3DSA:3.40.50.300:FF:002275

PHOBIUS: NON\_CYTOPLASMIC\_DOMAIN

cd03263

Walker A/P-loop

H-loop/switch region

Q-loop/lid

ABC transporter signature motif

Walker B

ATP binding site

D-loop

# ABCA5

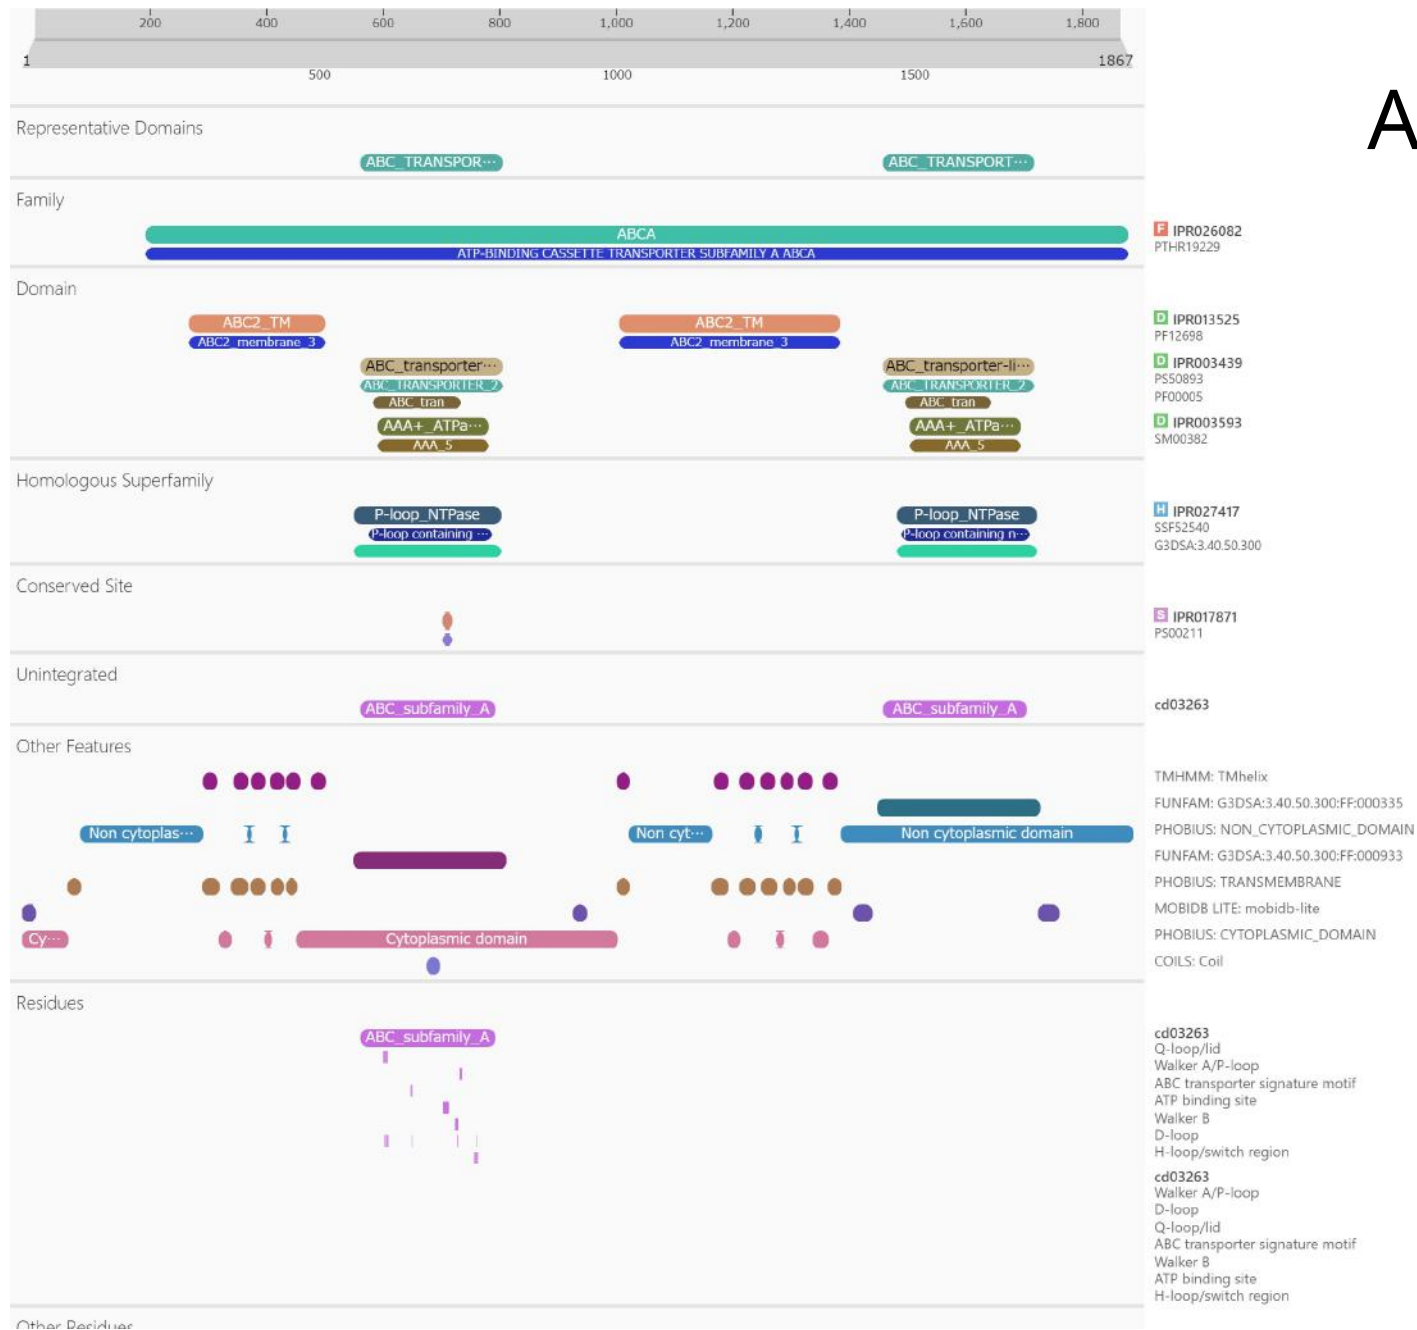

# ABCA1

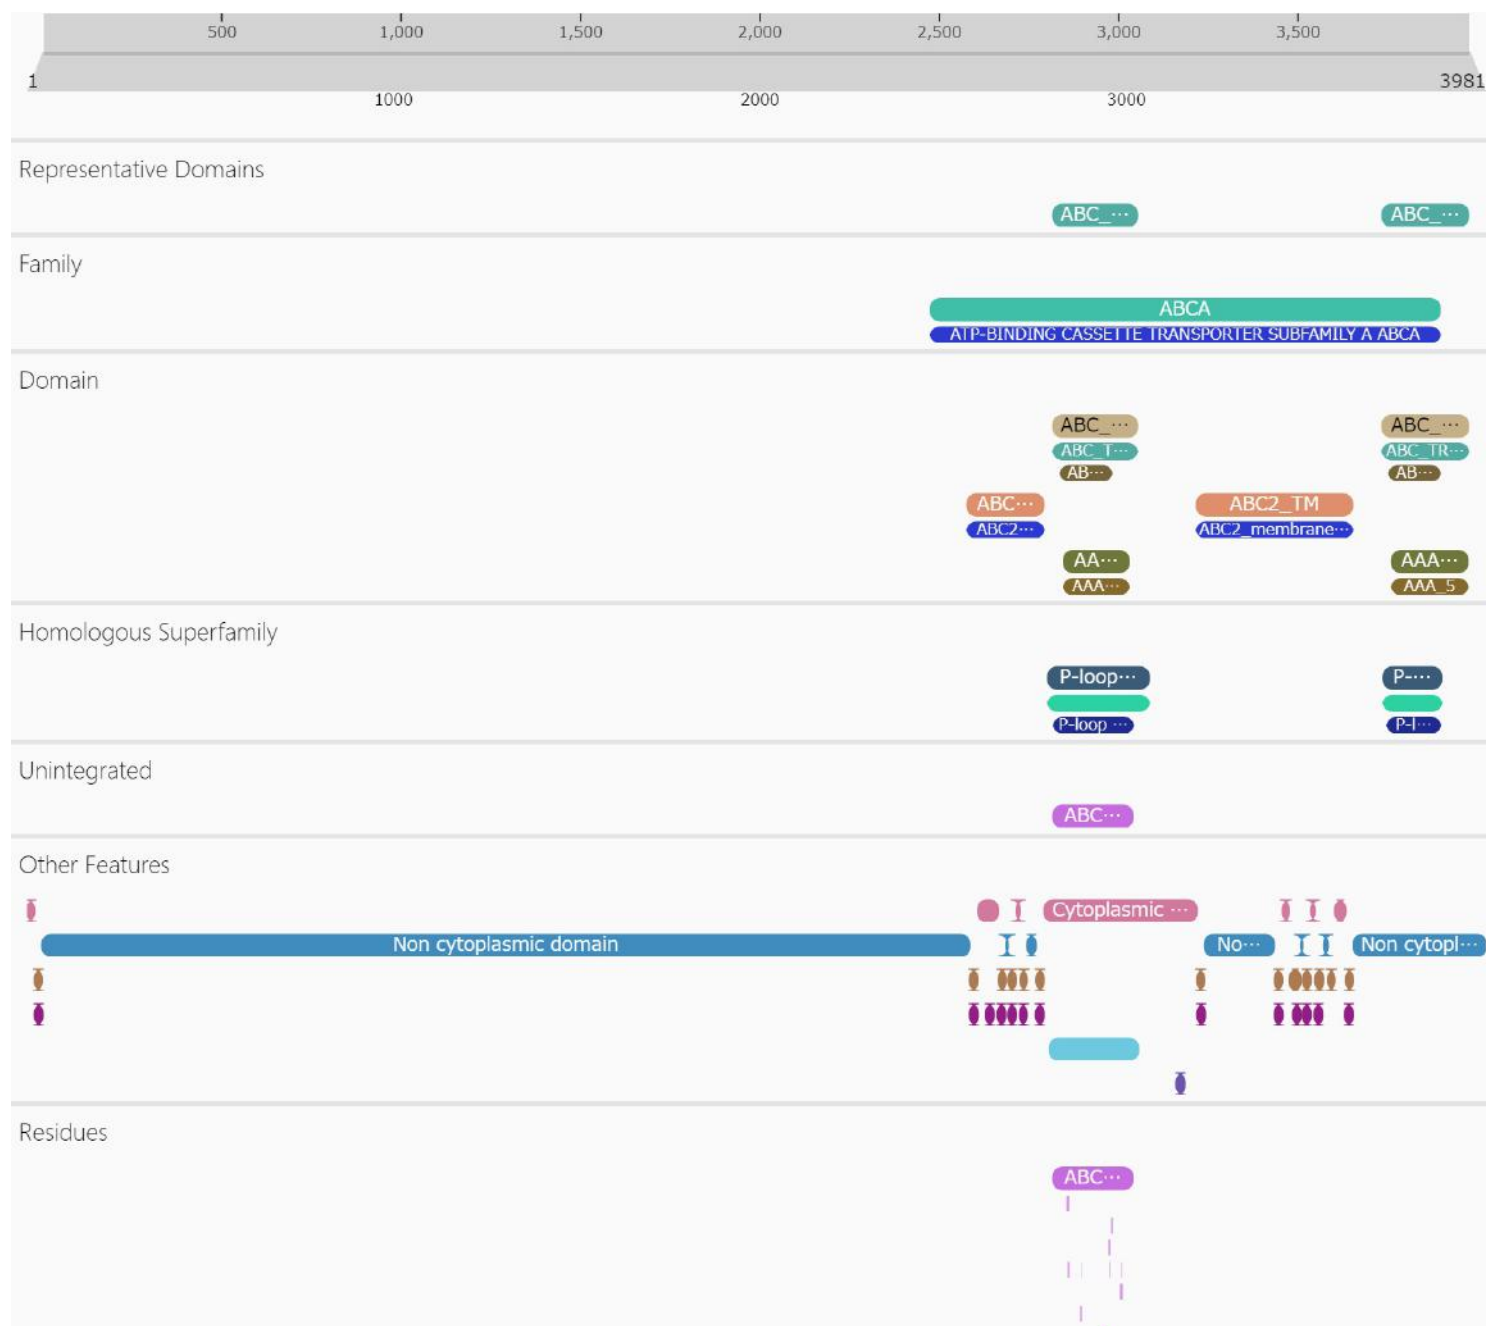

**F** IPR026082  
PTHR19229

**D** IPR003439  
PS50893  
PF00005

**D** IPR013525  
PF12698

**D** IPR003593  
SM00382

**H** IPR027417  
G3DSA:3.40.50.300  
SSF52540

cd03263

PHOBIUS: CYTOPLASMIC\_DOMAIN  
PHOBIUS: NON\_CYTOPLASMIC\_DOMAIN  
PHOBIUS: TRANSMEMBRANE  
TMHMM: TMhelix  
FUNFAM: G3DSA:3.40.50.300:FF:001253  
MOBIDB LITE: mobidb-lite

cd03263  
Walker A/P-loop  
D-loop  
Walker B  
ATP binding site  
H-loop/switch region  
Q-loop/lid  
ABC transporter signature motif

# ABCA12

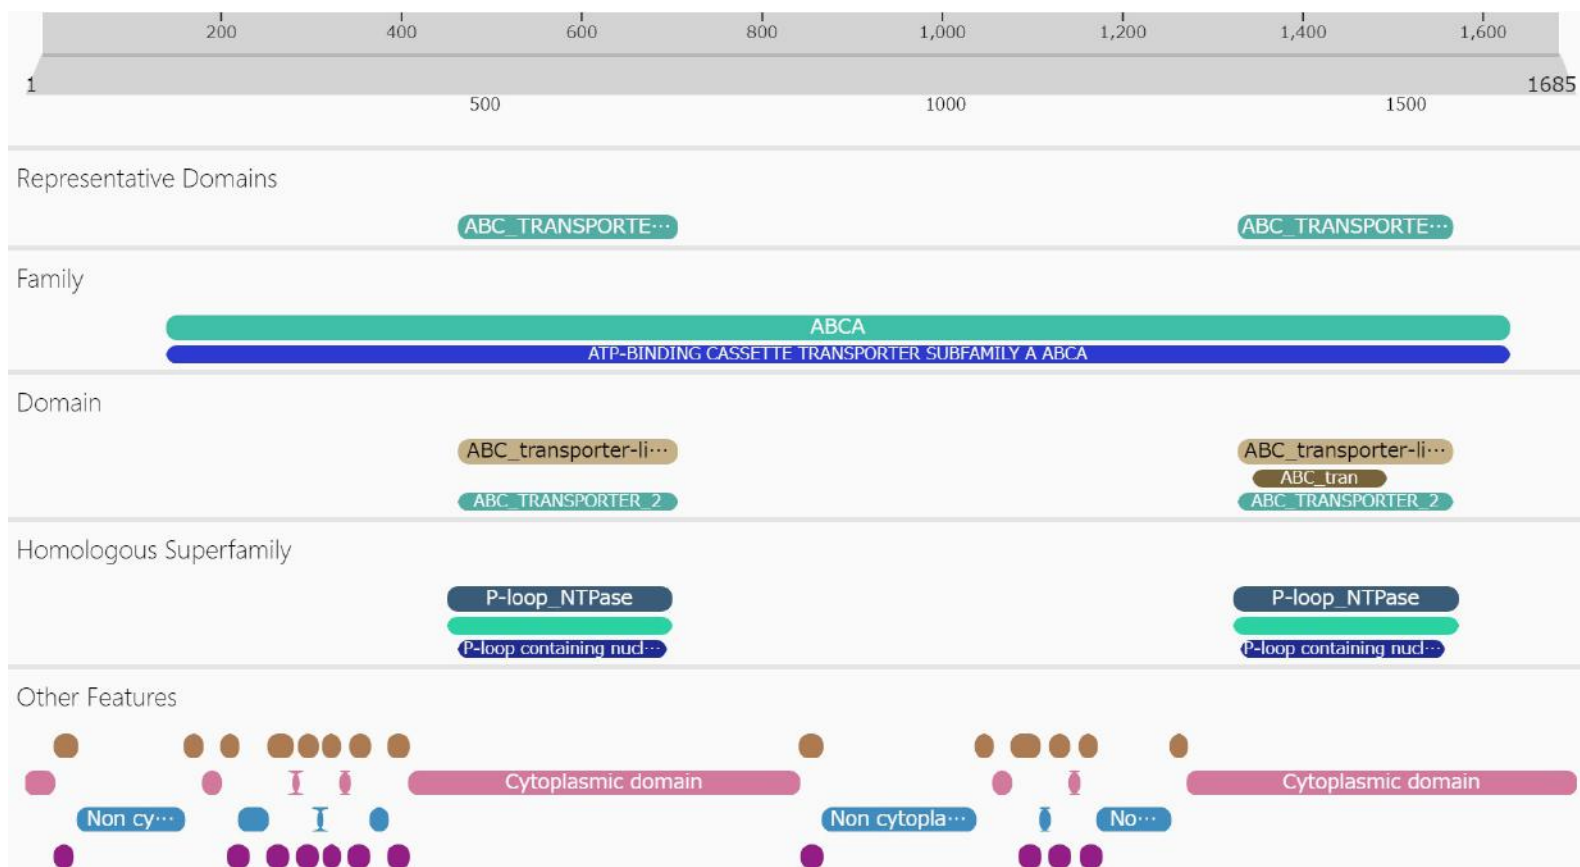



# ABCB1

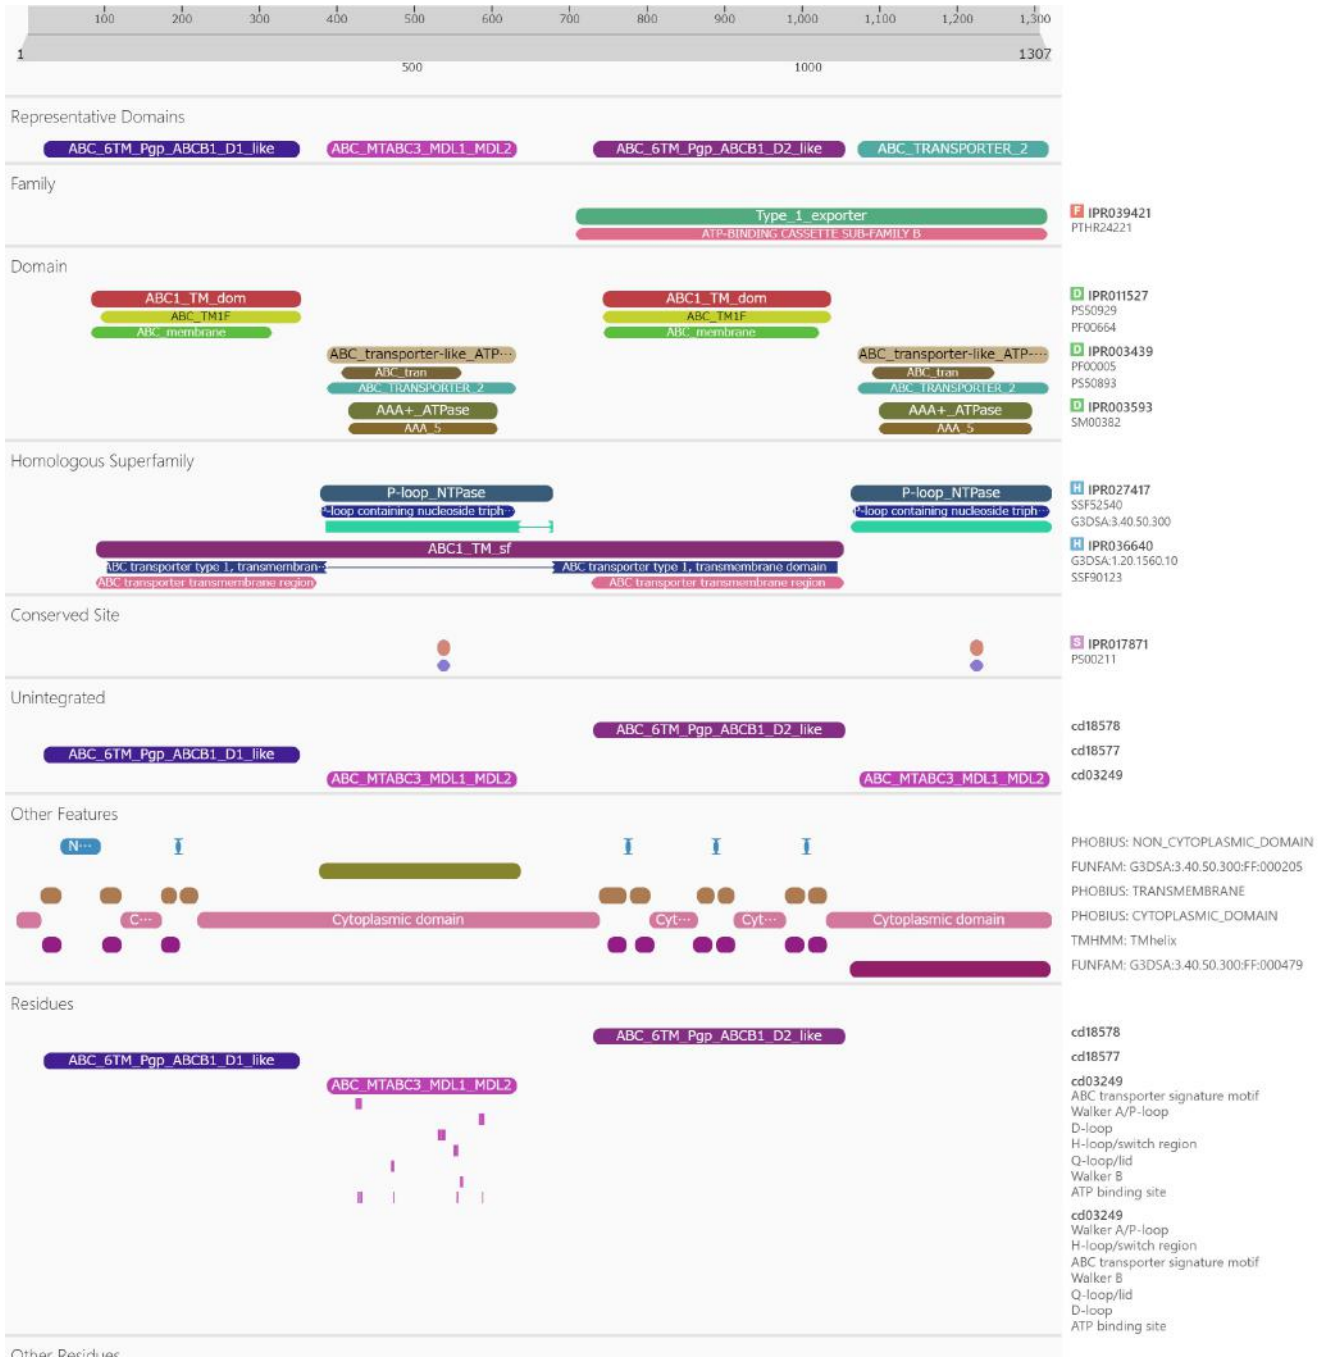



# ABCB2

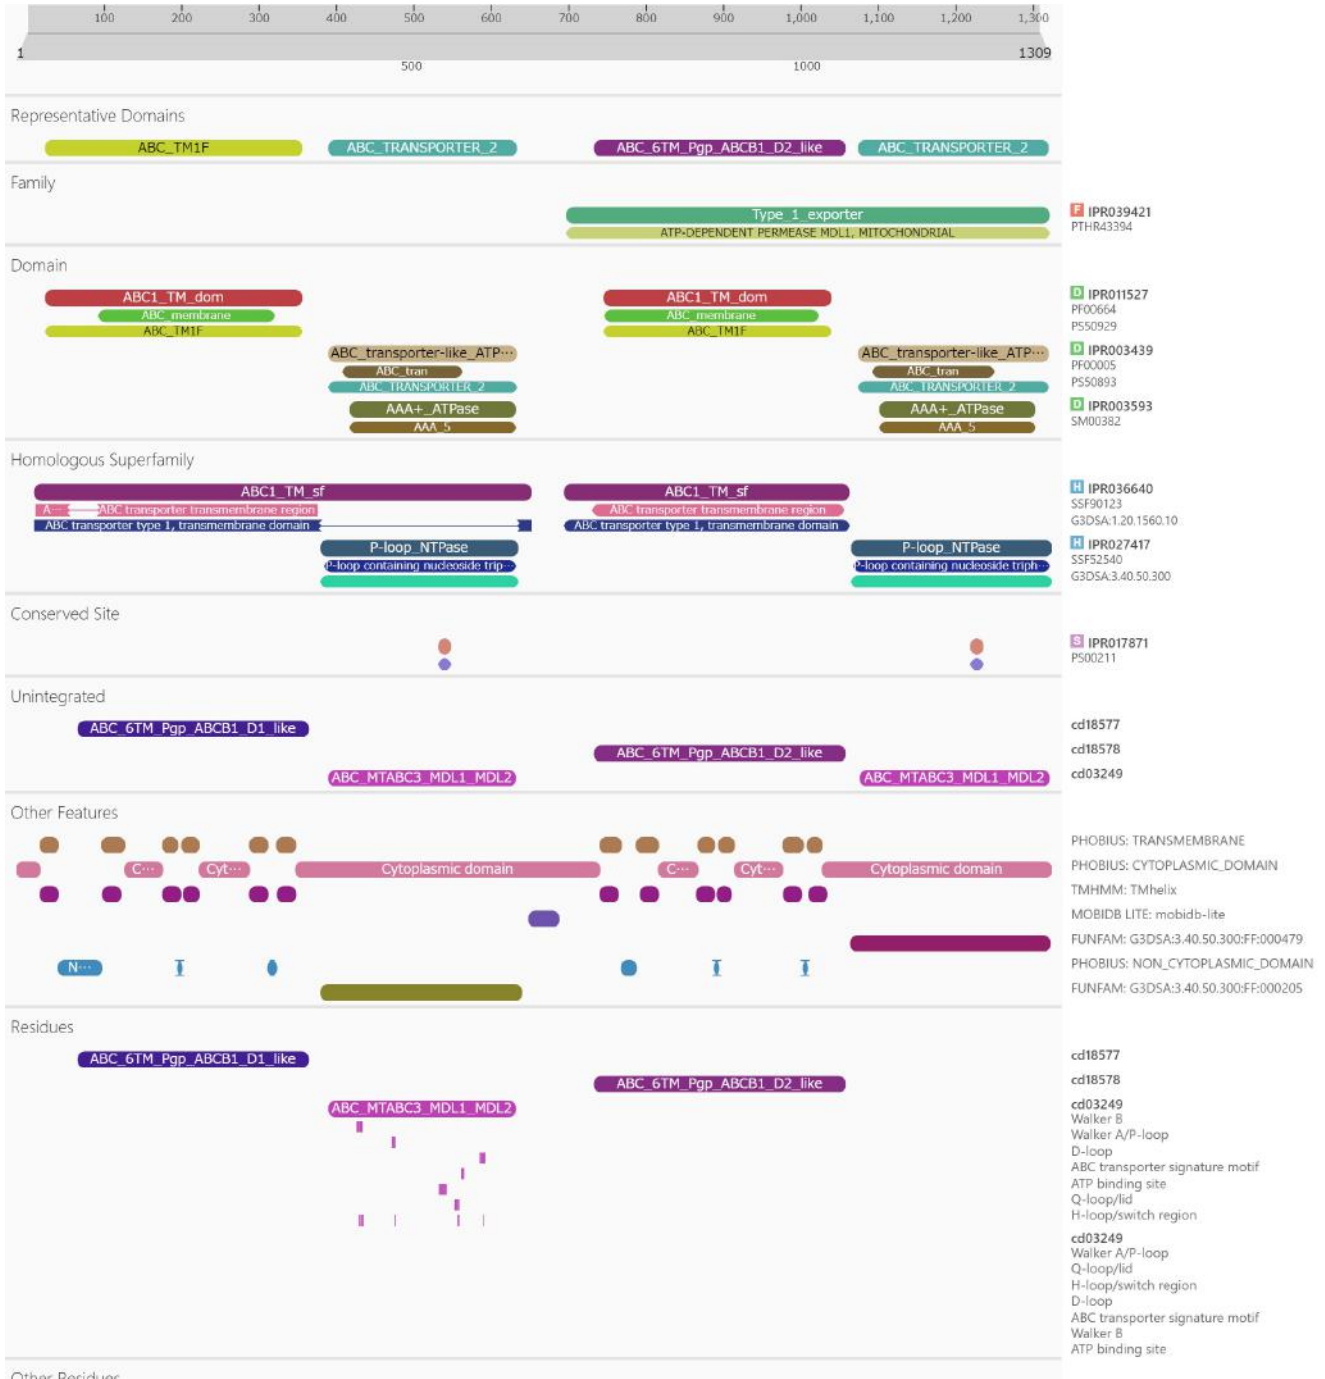

# ABCB3

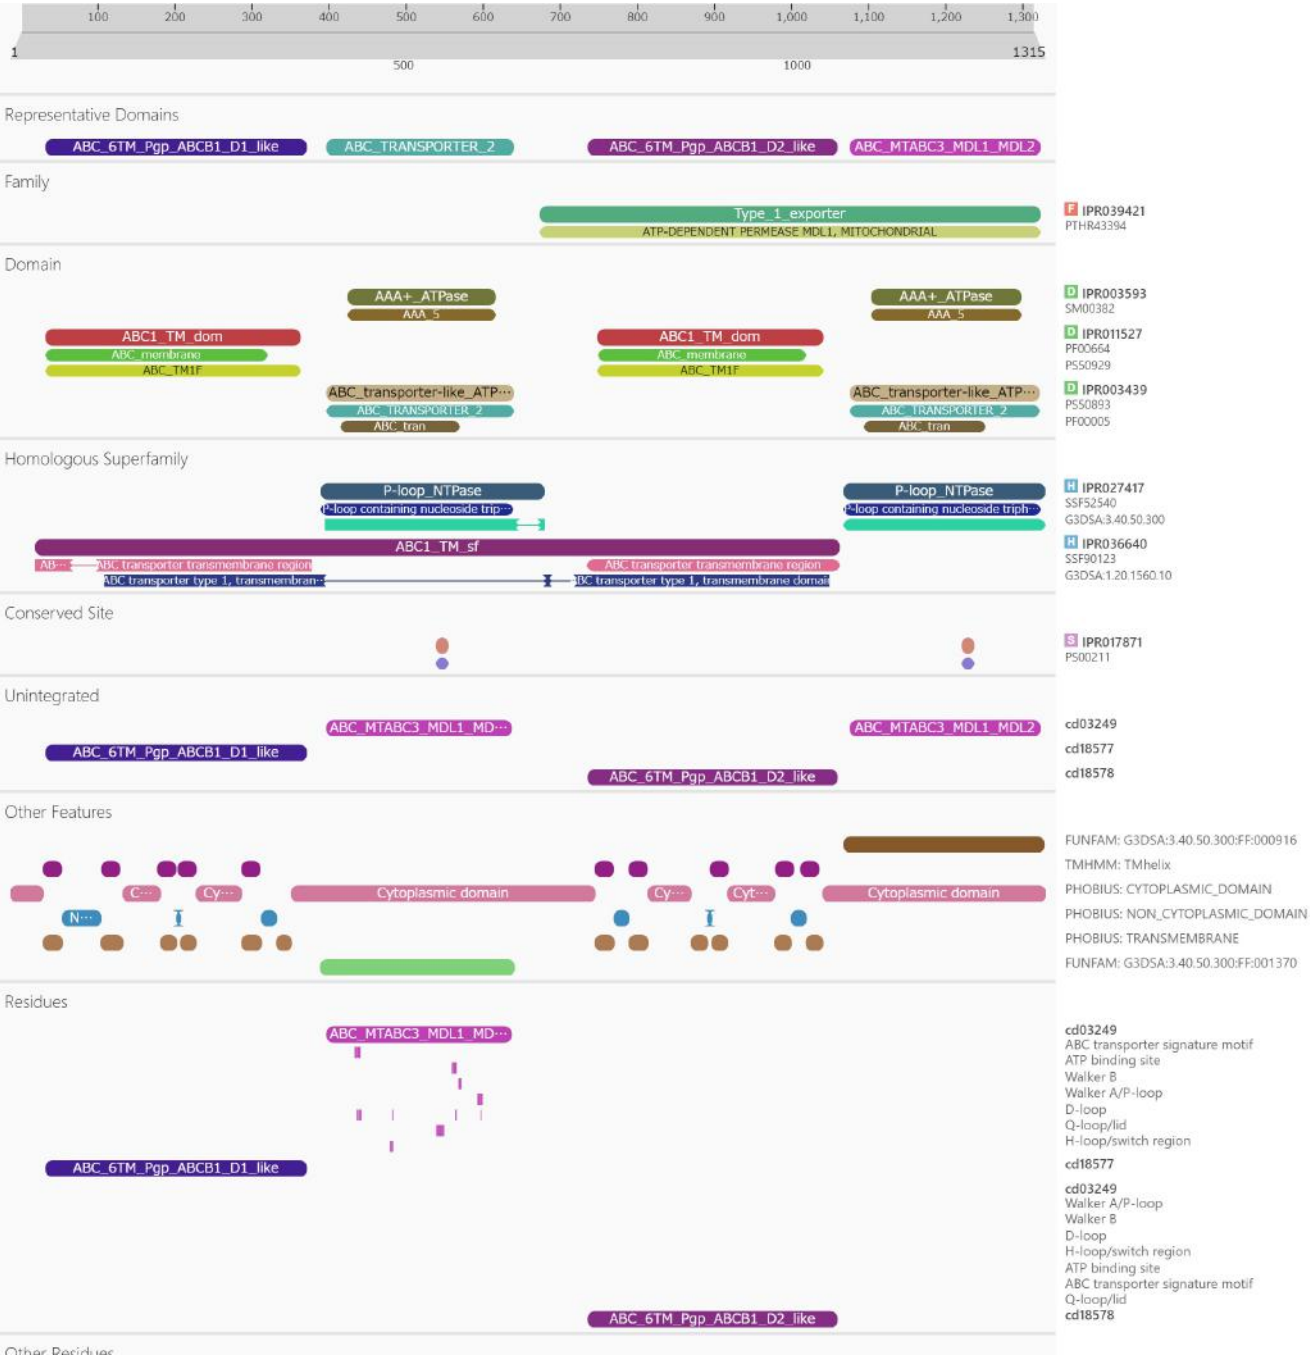

# ABCB4

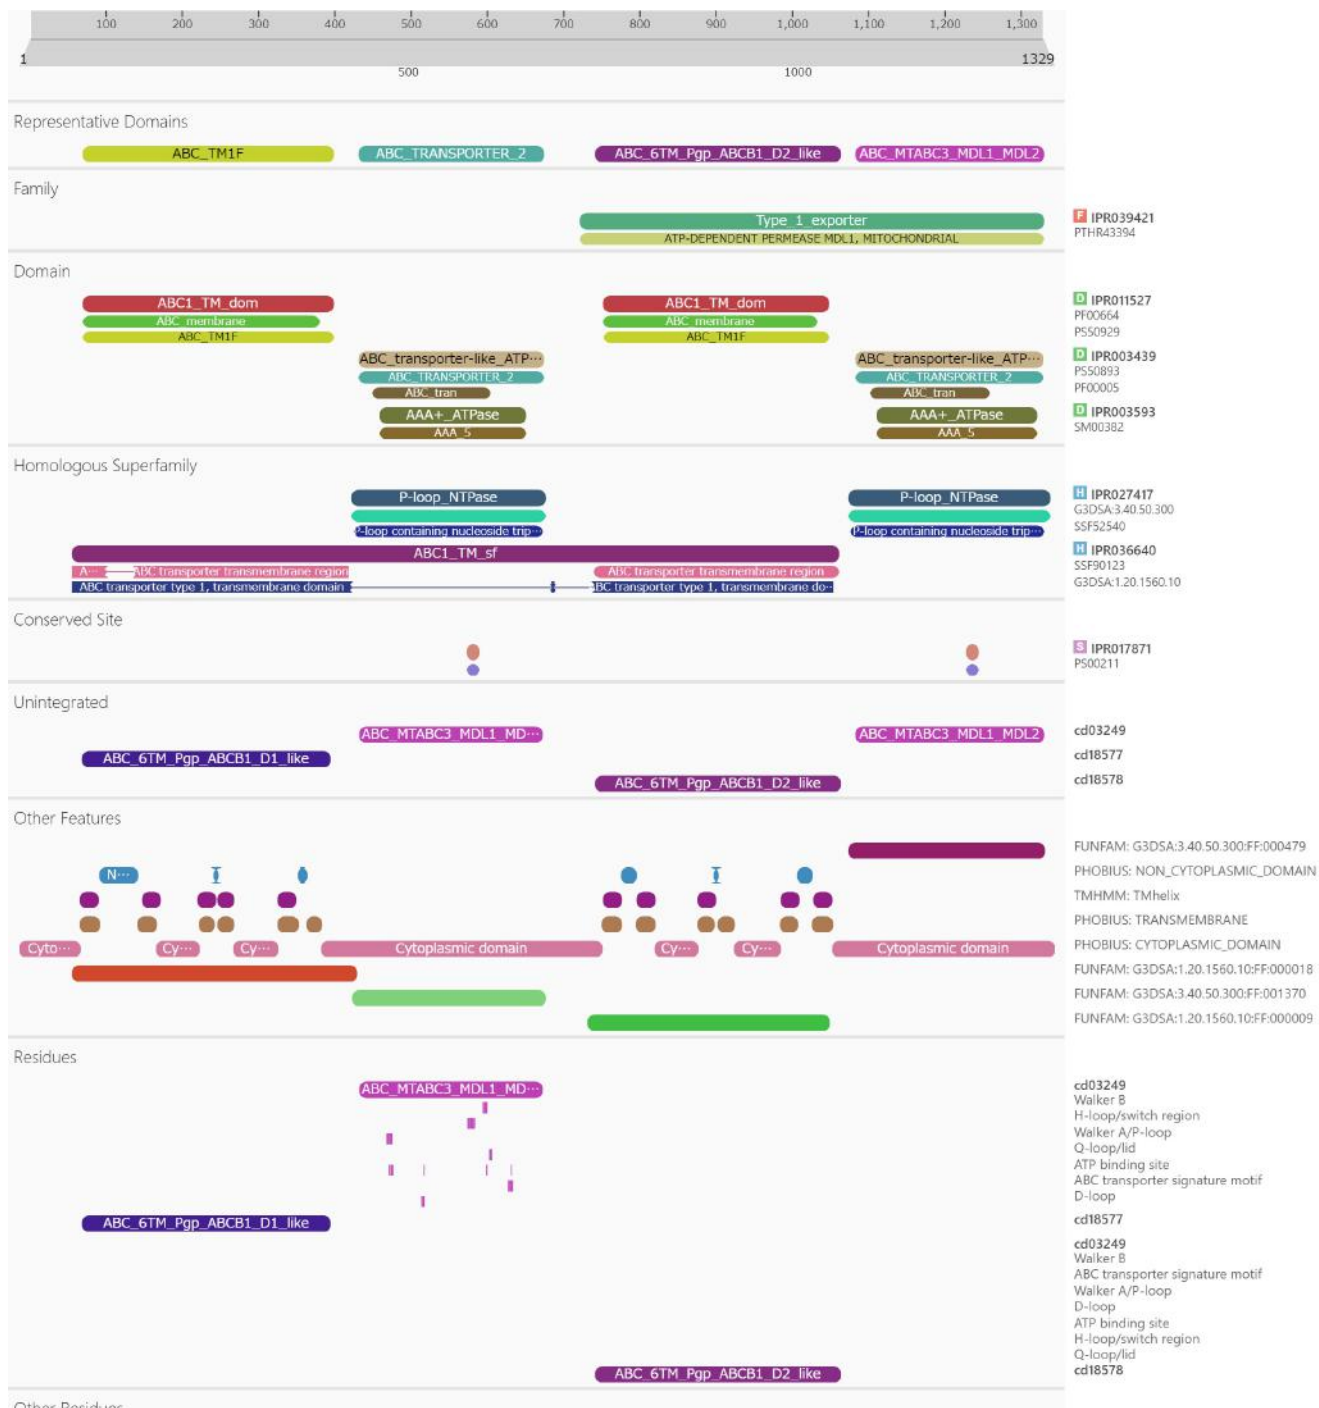

# ABCB5

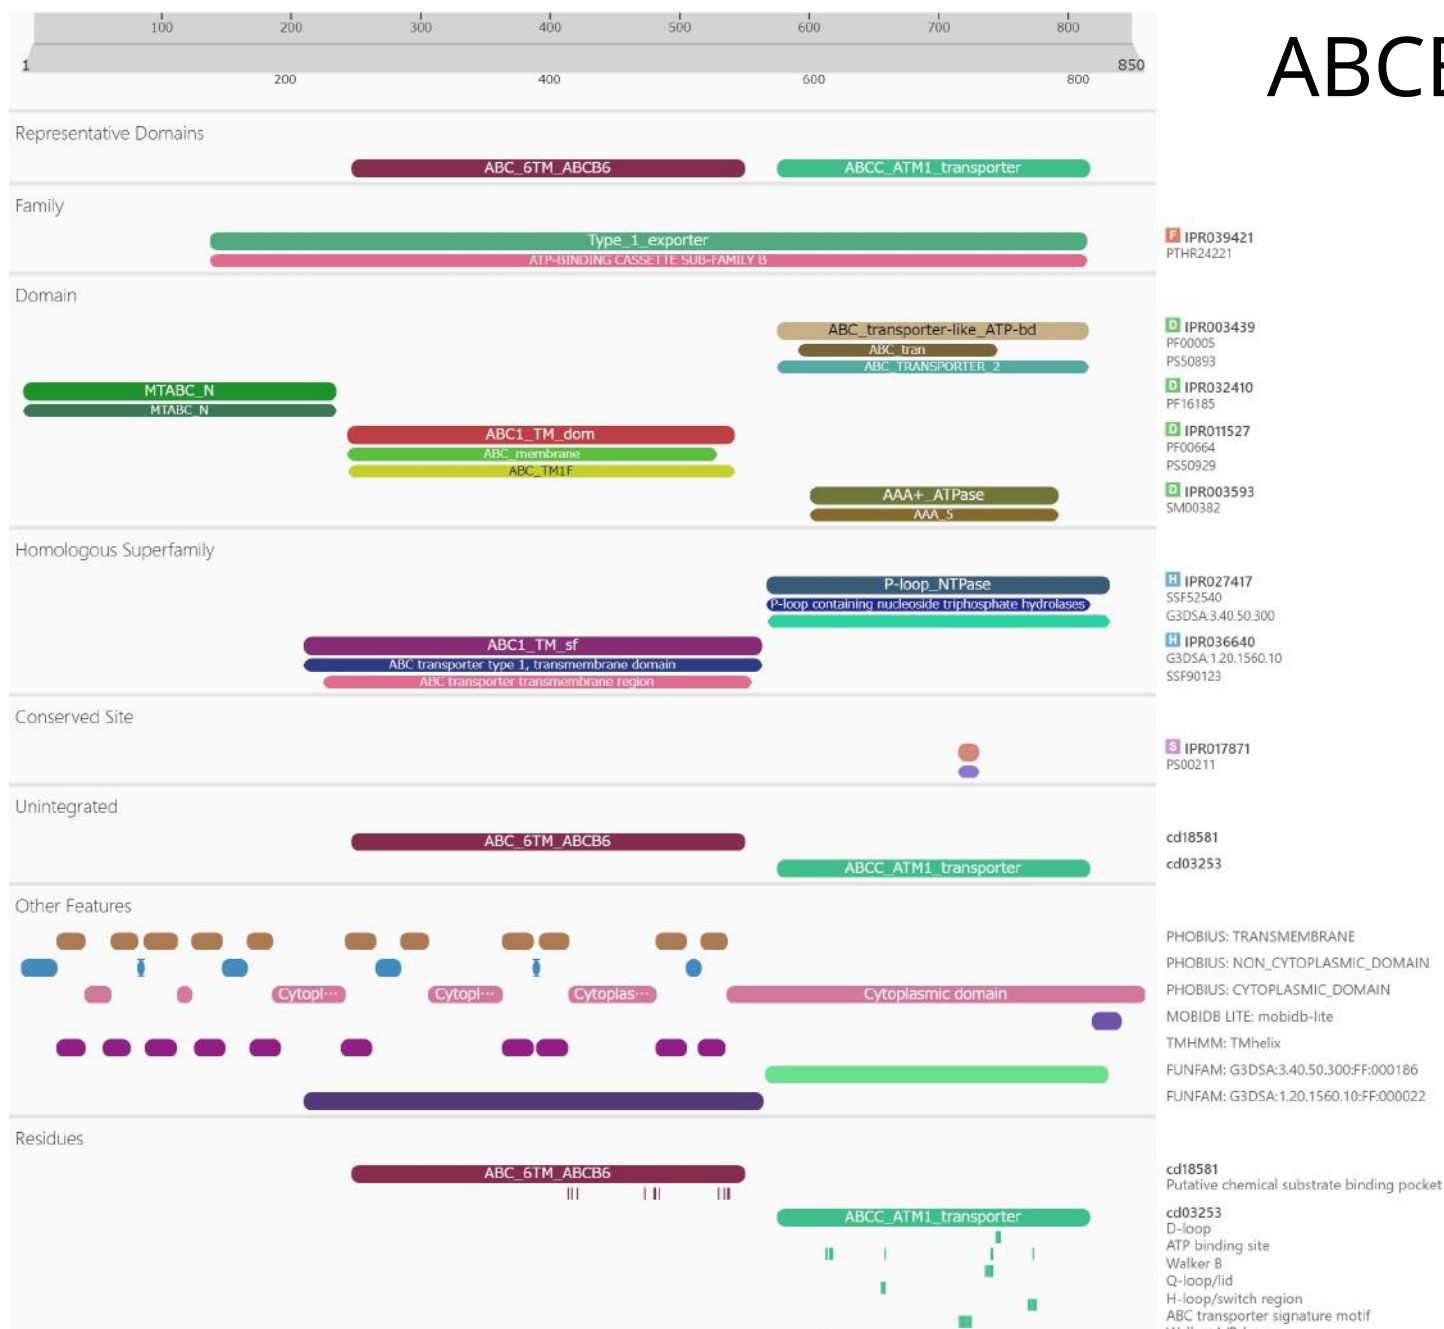

# ABCB6

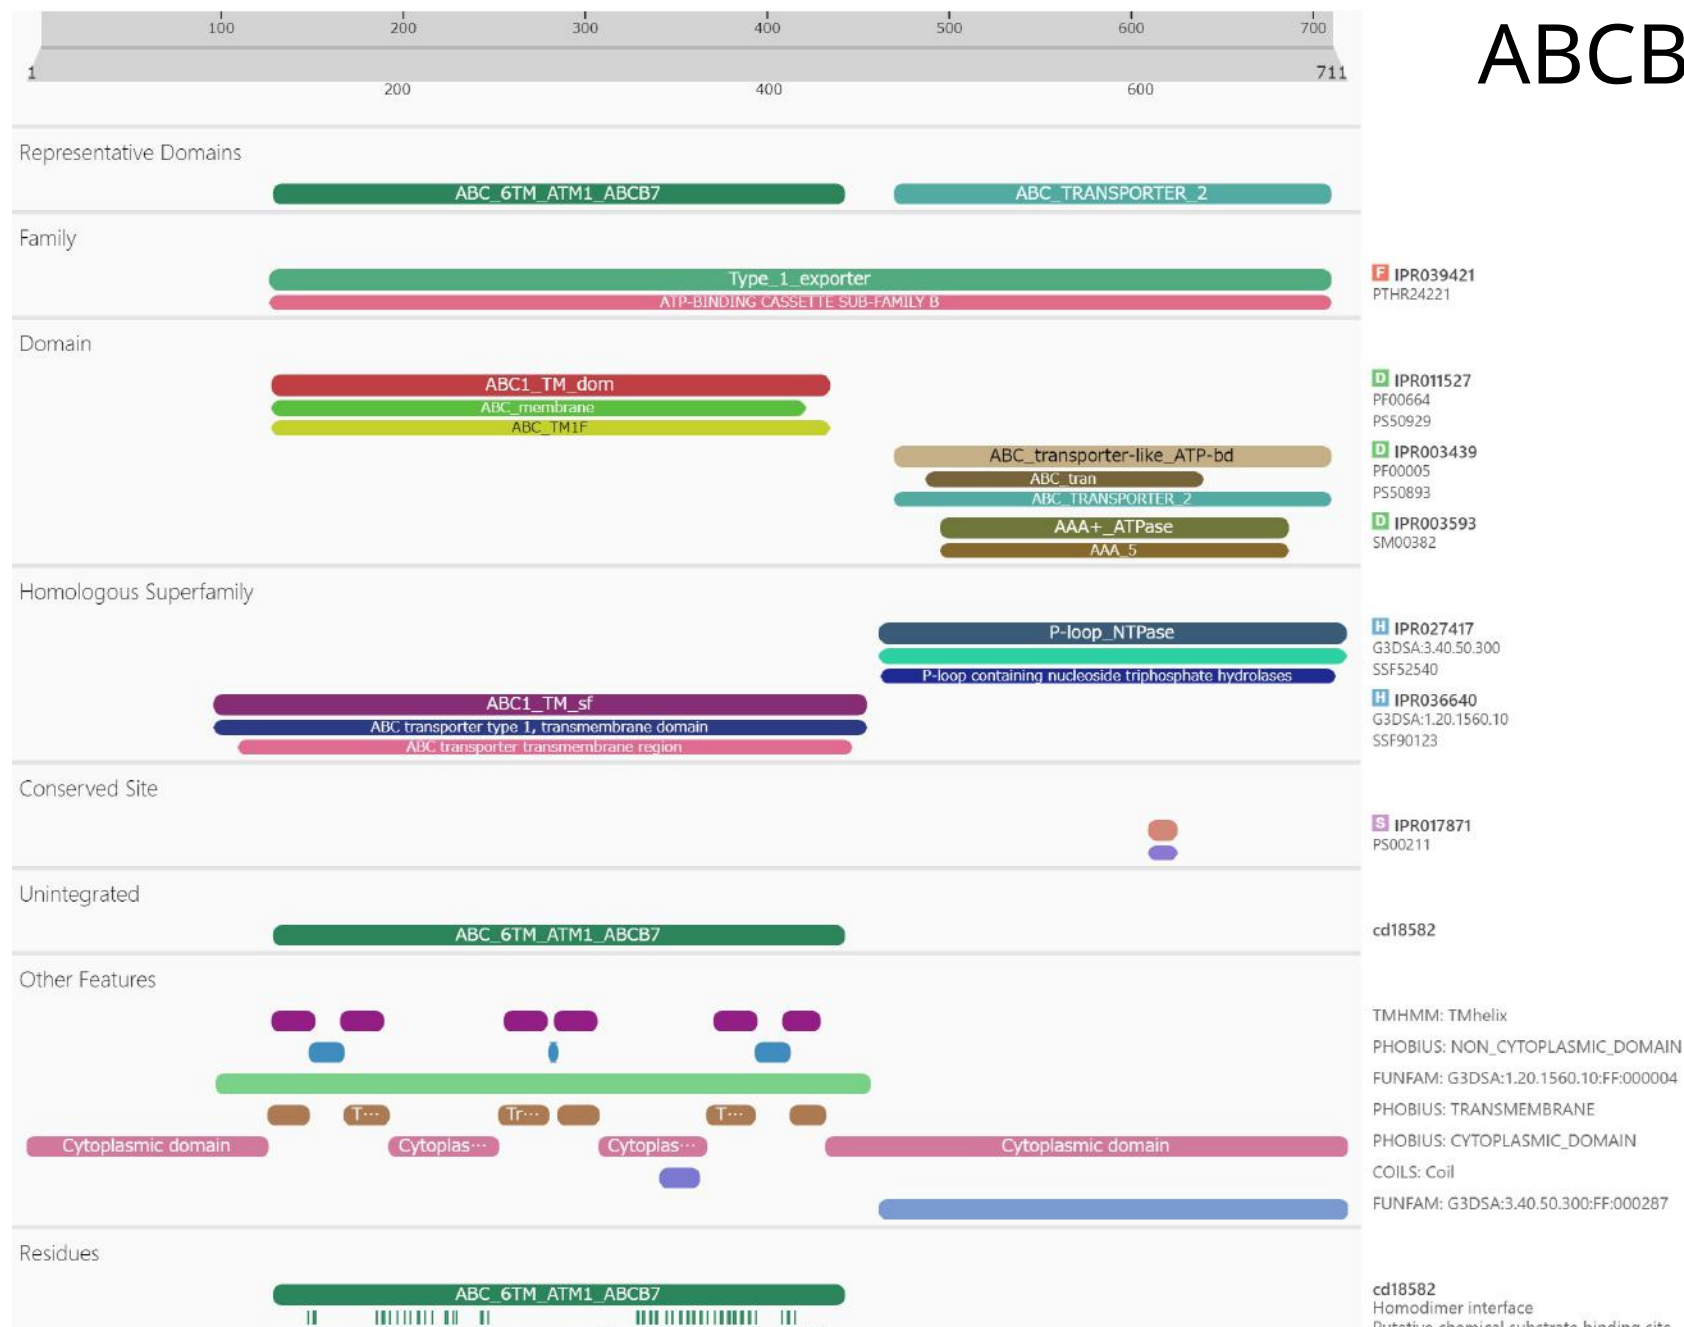

# ABCB7

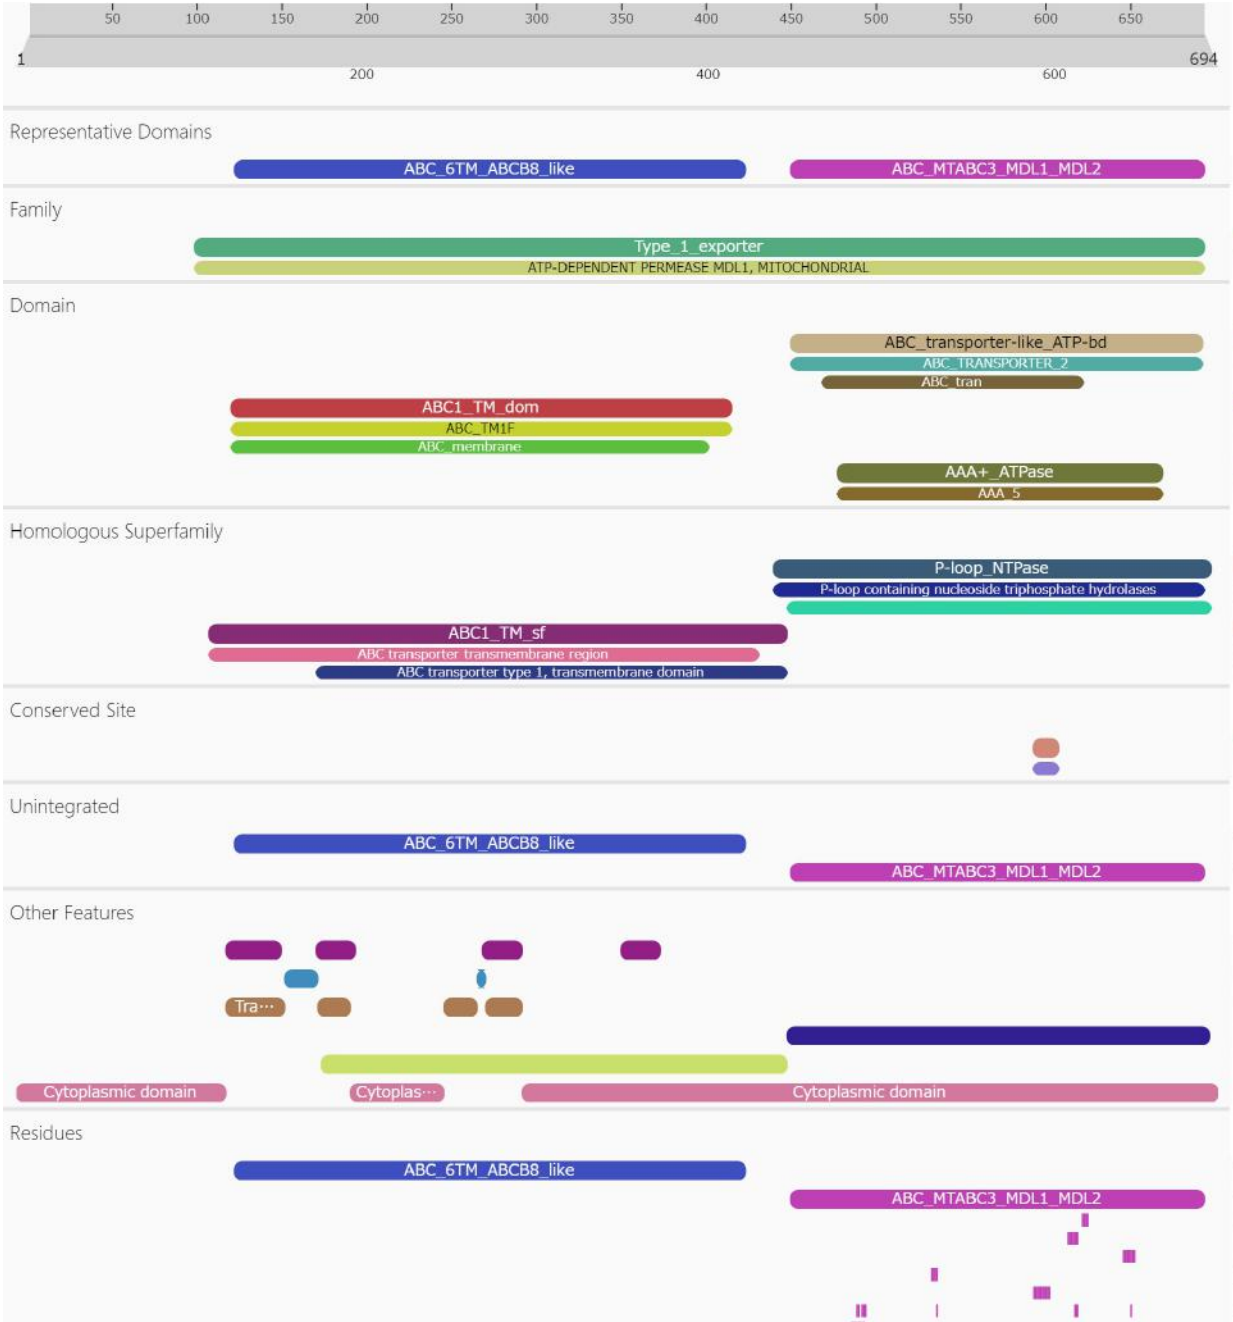

IPR039421  
PTHR43394

IPR003439  
PS50893  
PF00005

IPR011527  
PS50929  
PF00664

IPR003593  
SM00382

IPR027417  
SSF52540  
G3DSA:3.40.50.300

IPR036640  
SSF90123  
G3DSA:1.20.1560.10

IPR017871  
PS00211

cd18574

cd03249

TMHMM: TMhelix  
PHOBIOUS: NON\_CYTOPLASMIC\_DOMAIN  
PHOBIOUS: TRANSMEMBRANE  
FUNFAM: G3DSA:3.40.50.300:FF:000403  
FUNFAM: G3DSA:1.20.1560.10:FF:000016  
PHOBIOUS: CYTOPLASMIC\_DOMAIN

cd18574

cd03249

D-loop  
Walker B  
H-loop/switch region  
Q-loop/lid  
ABC transporter signature motif  
ATP binding site  
Walker A/B loop



# ABCB8

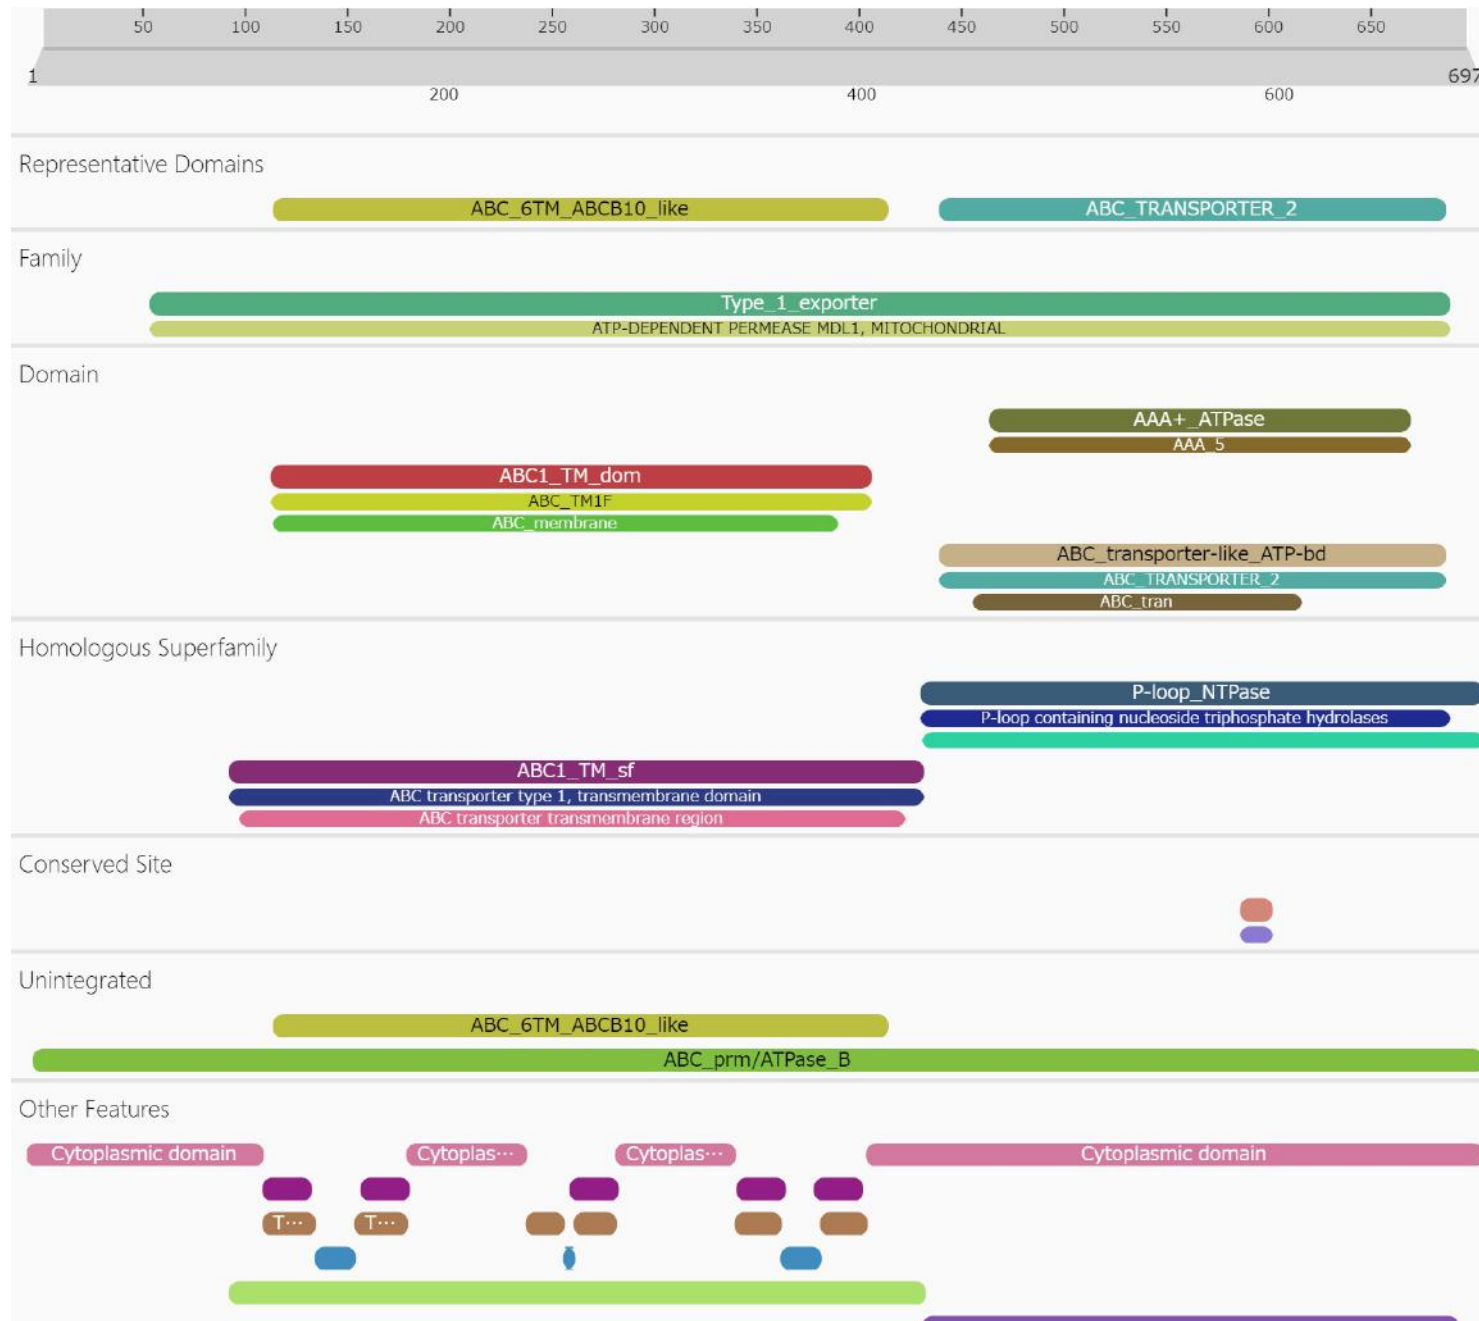

**F** IPR039421  
PTHR43394

**D** IPR003593  
SM00382

**D** IPR011527  
PSS0929  
PF00664

**D** IPR003439  
PSS0893  
PF00005

**H** IPR027417  
SSF52540  
G3DSA:3.40.50.300

**H** IPR036640  
G3DSA:1.20.1560.10  
SSF90123

**S** IPR017871  
PS00211

cd18573  
PIRSF002773

PHOBIUS: CYTOPLASMIC\_DOMAIN  
TMHMM: TMhelix  
PHOBIUS: TRANSMEMBRANE  
PHOBIUS: NON\_CYTOPLASMIC\_DOMAIN  
FUNFAM: G3DSA:1.20.1560.10:FF:000048  
FUNFAM: G3DSA:3.40.50.300:FF:000218



# ABCB9

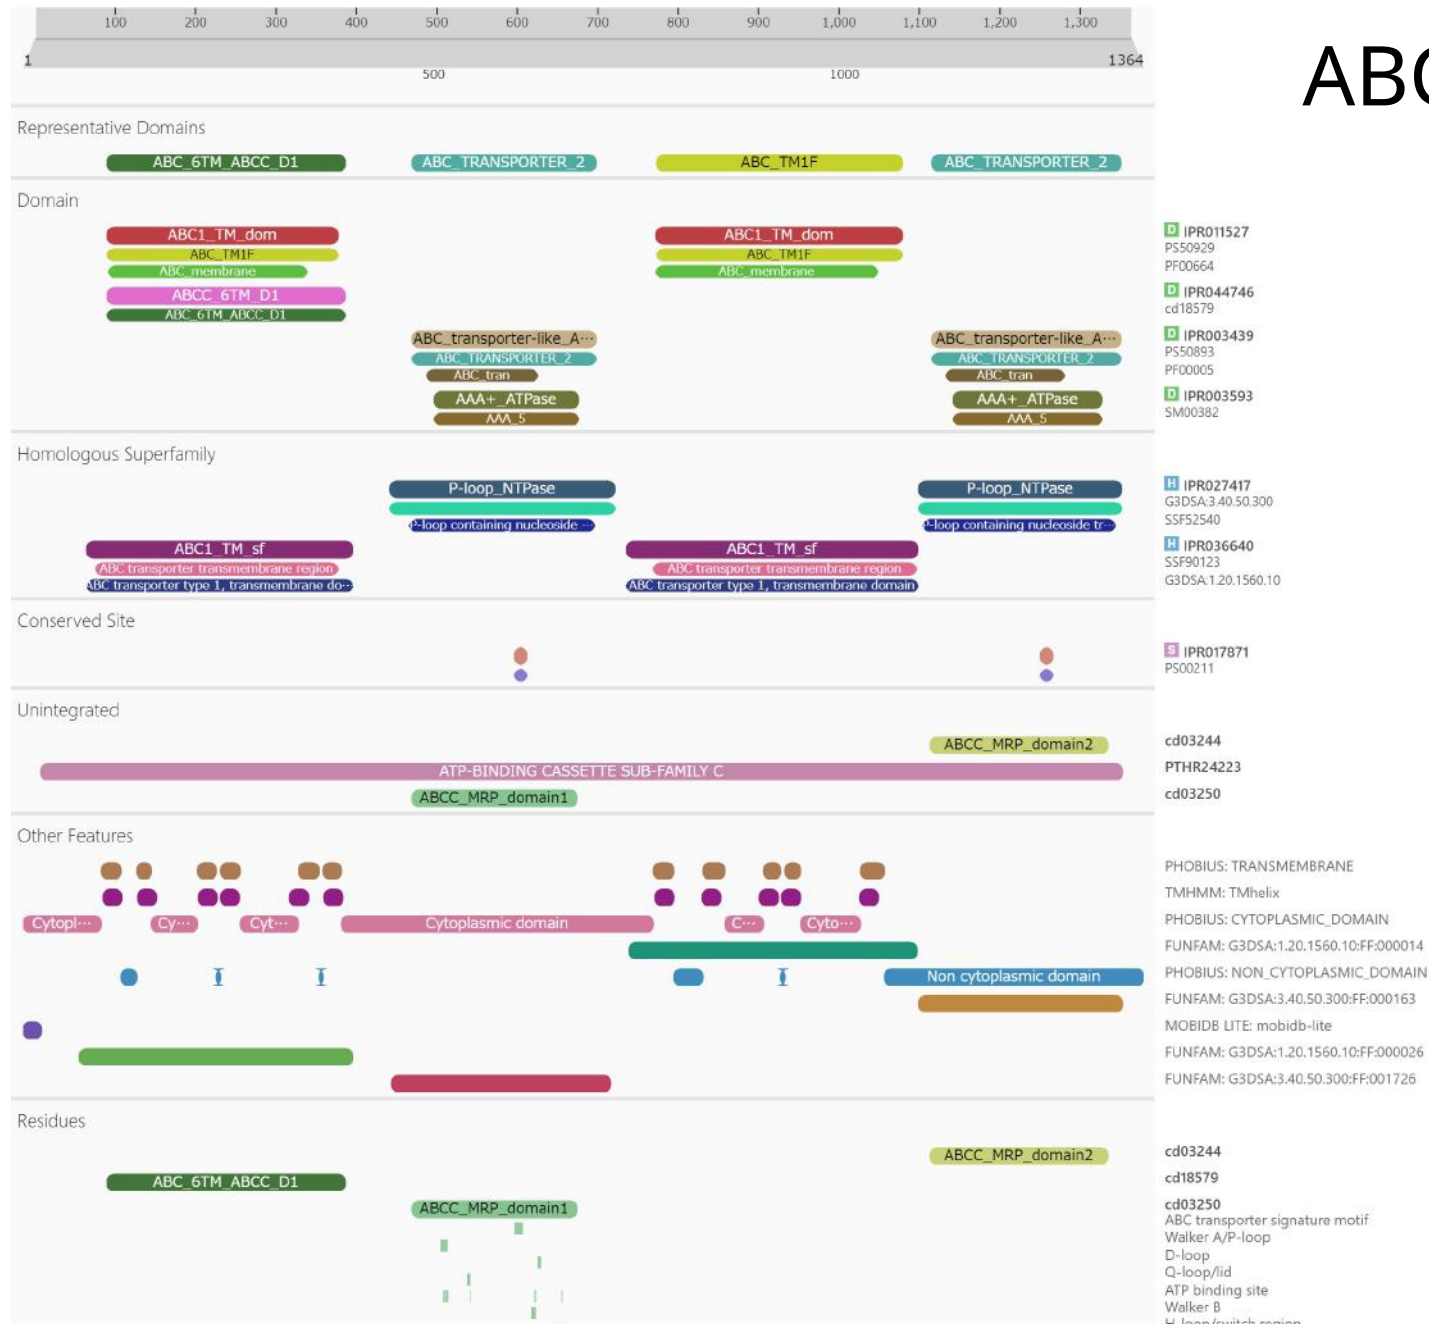

# ABCC3

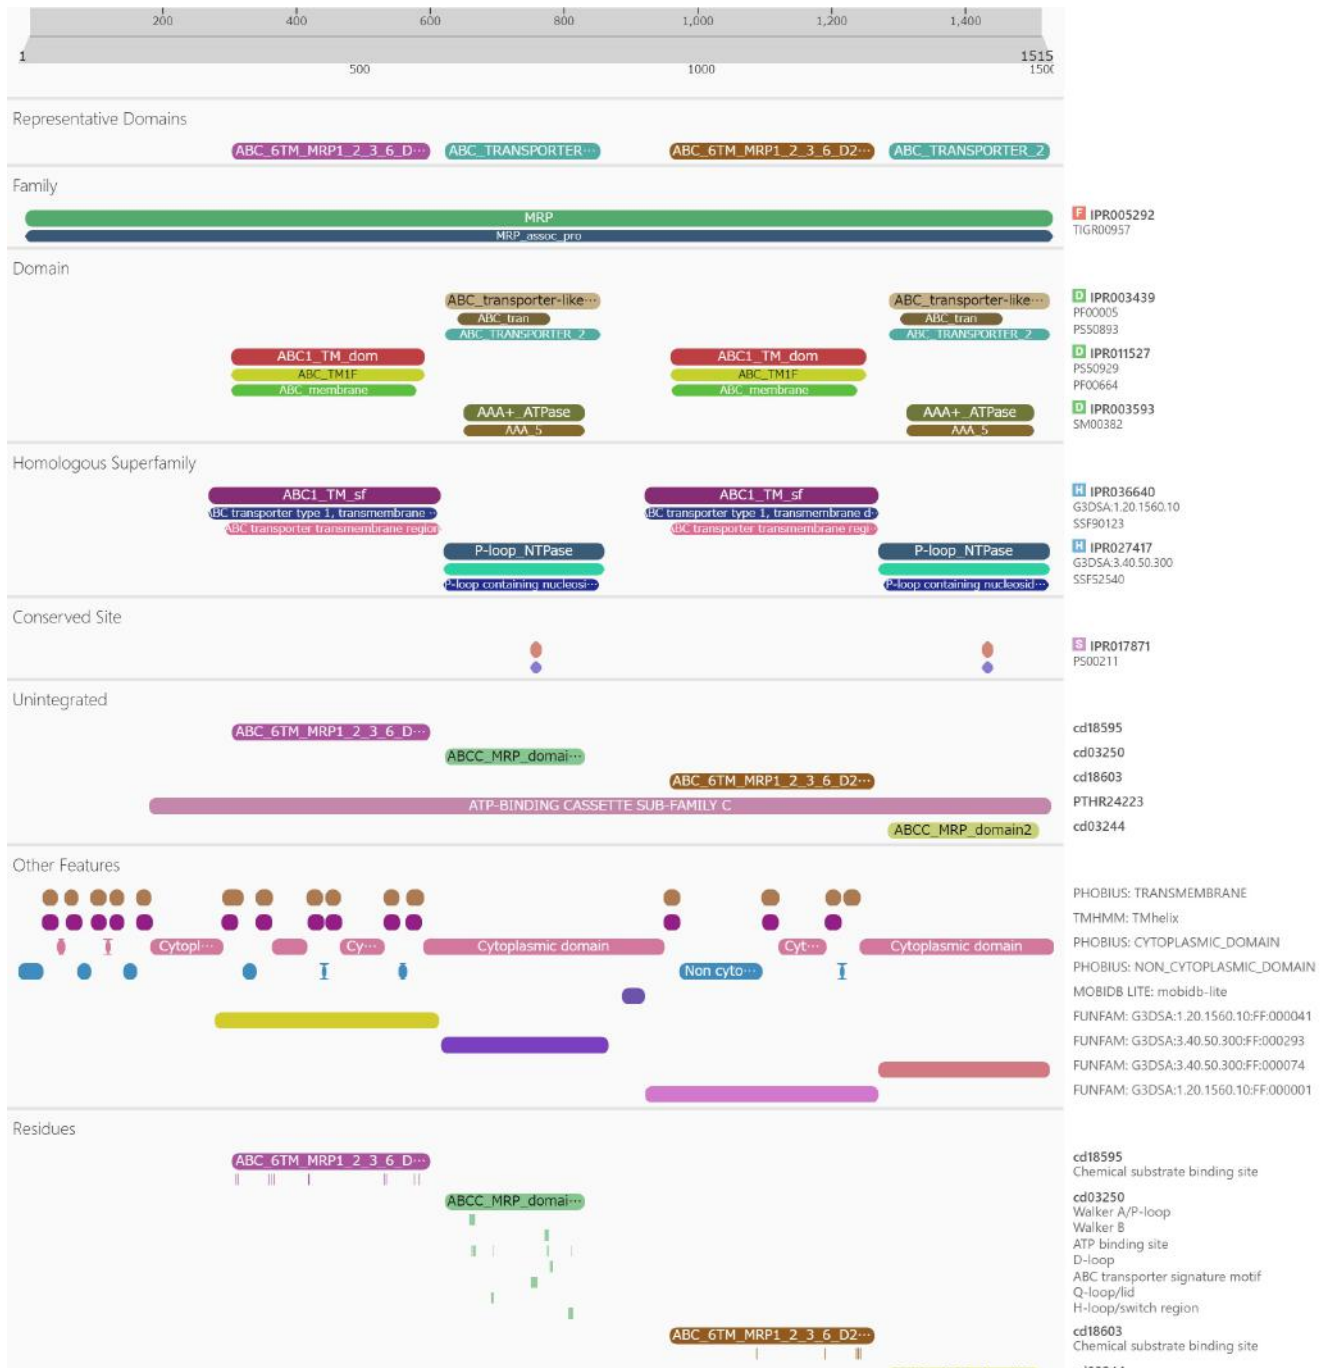

# ABCC1

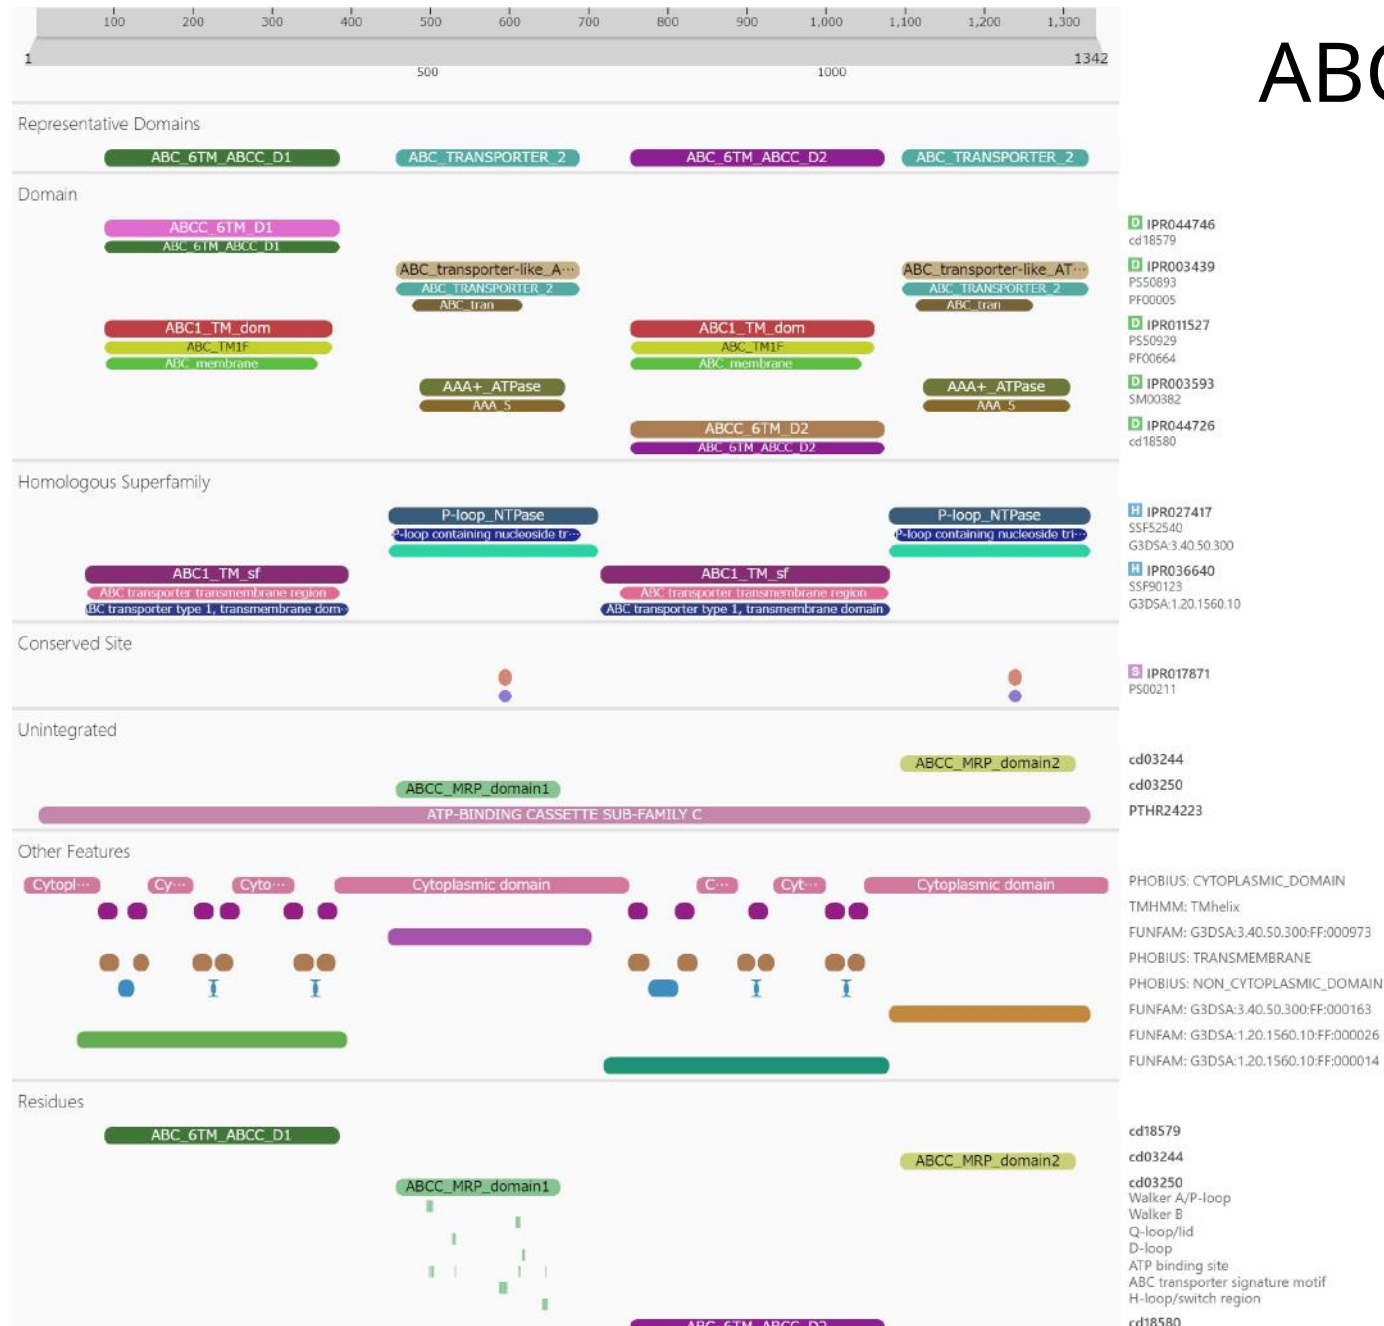

# ABCC2

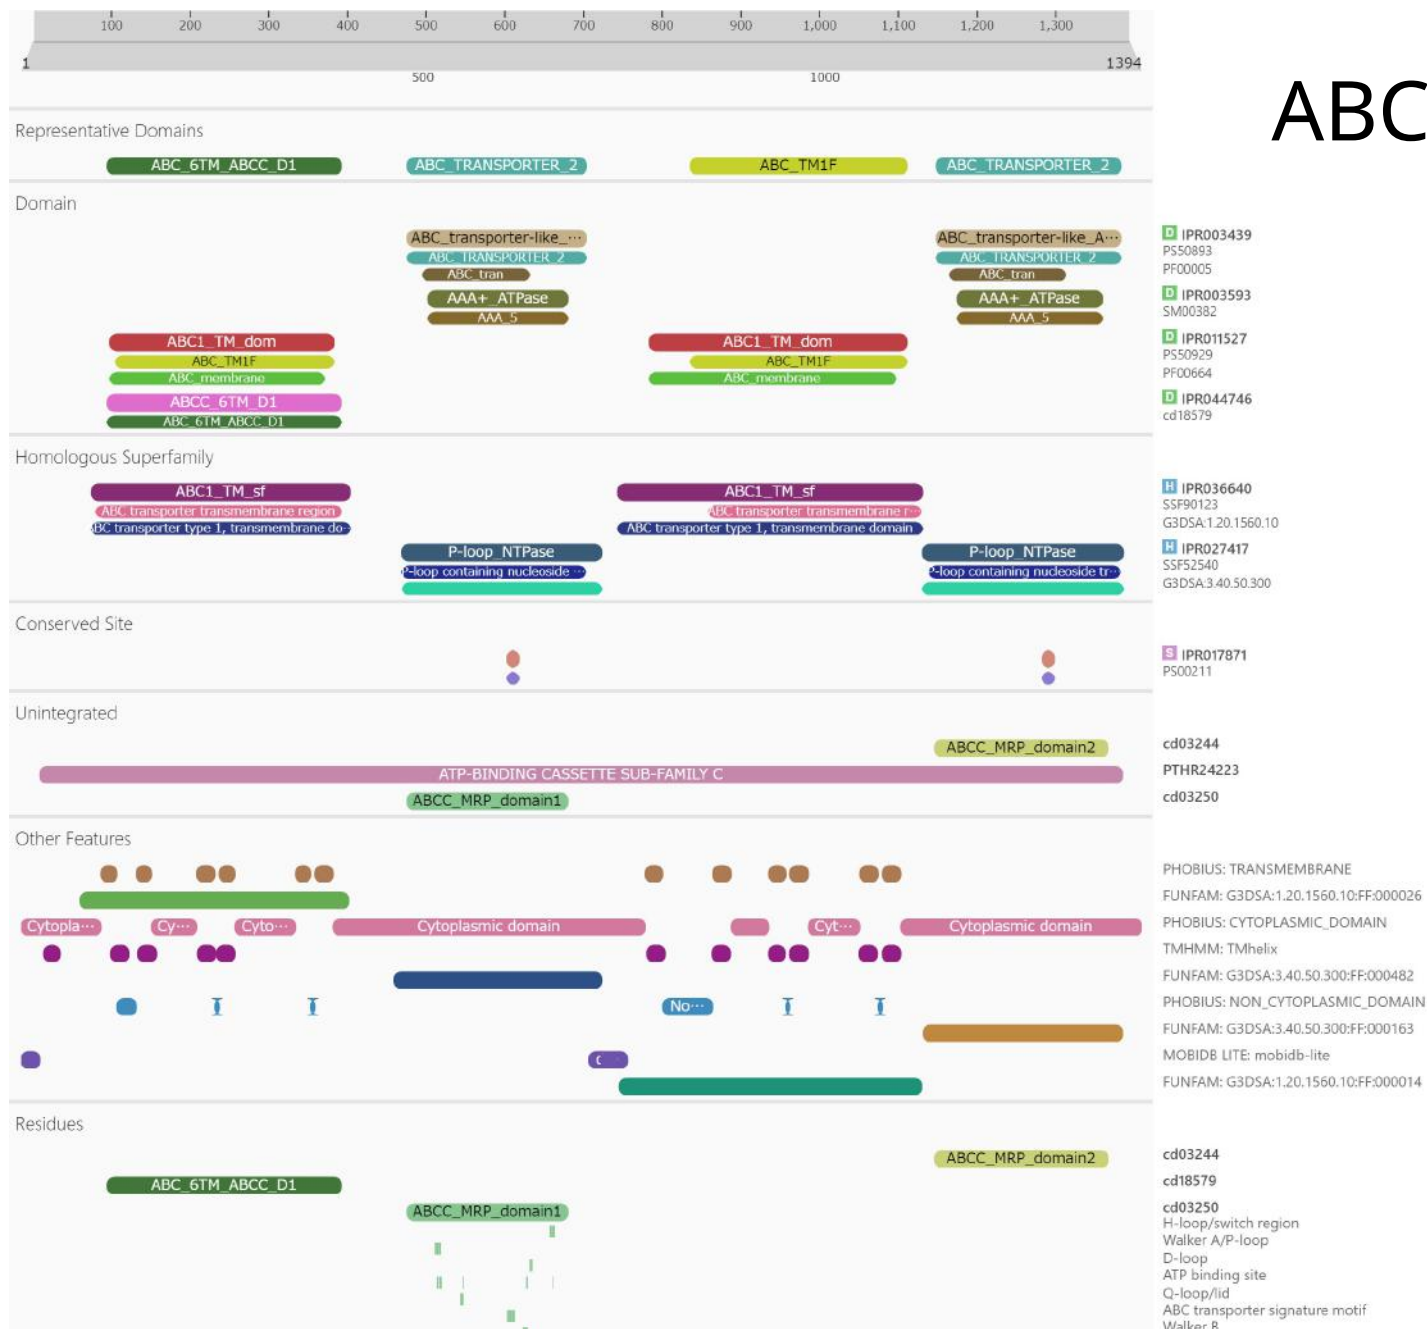

# ABCC5

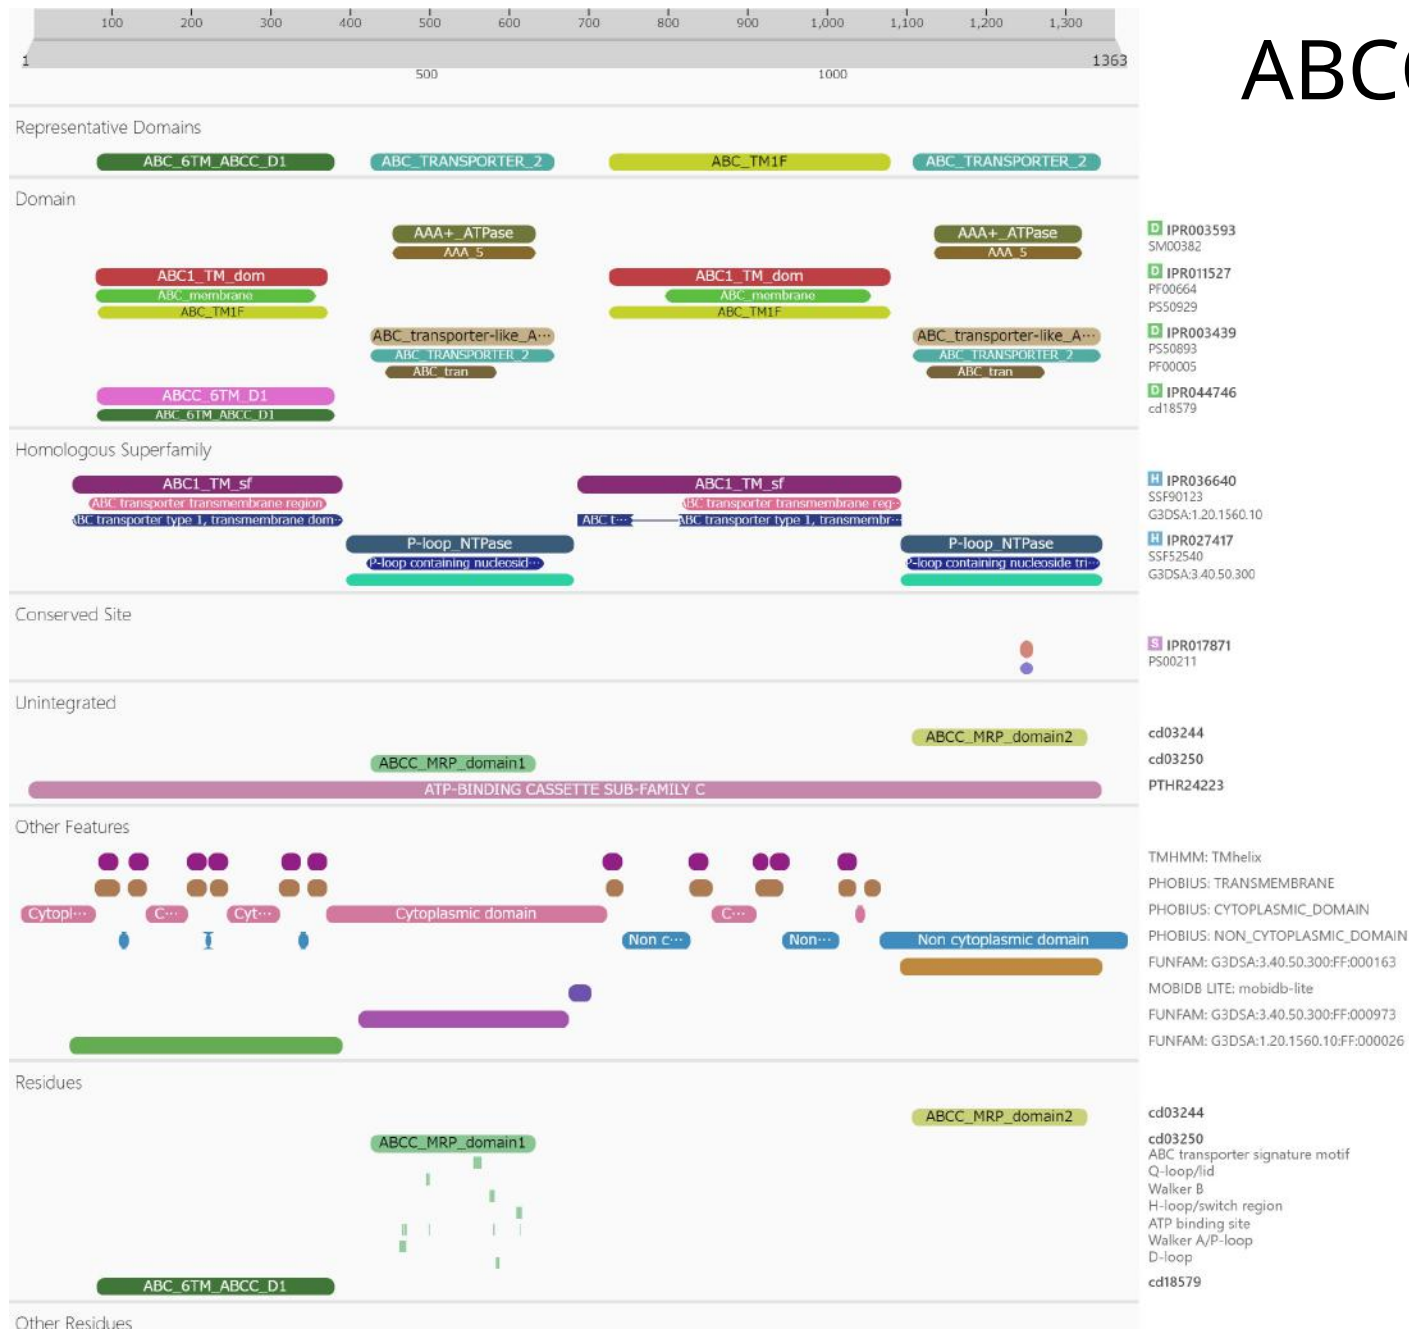



# ABCC4

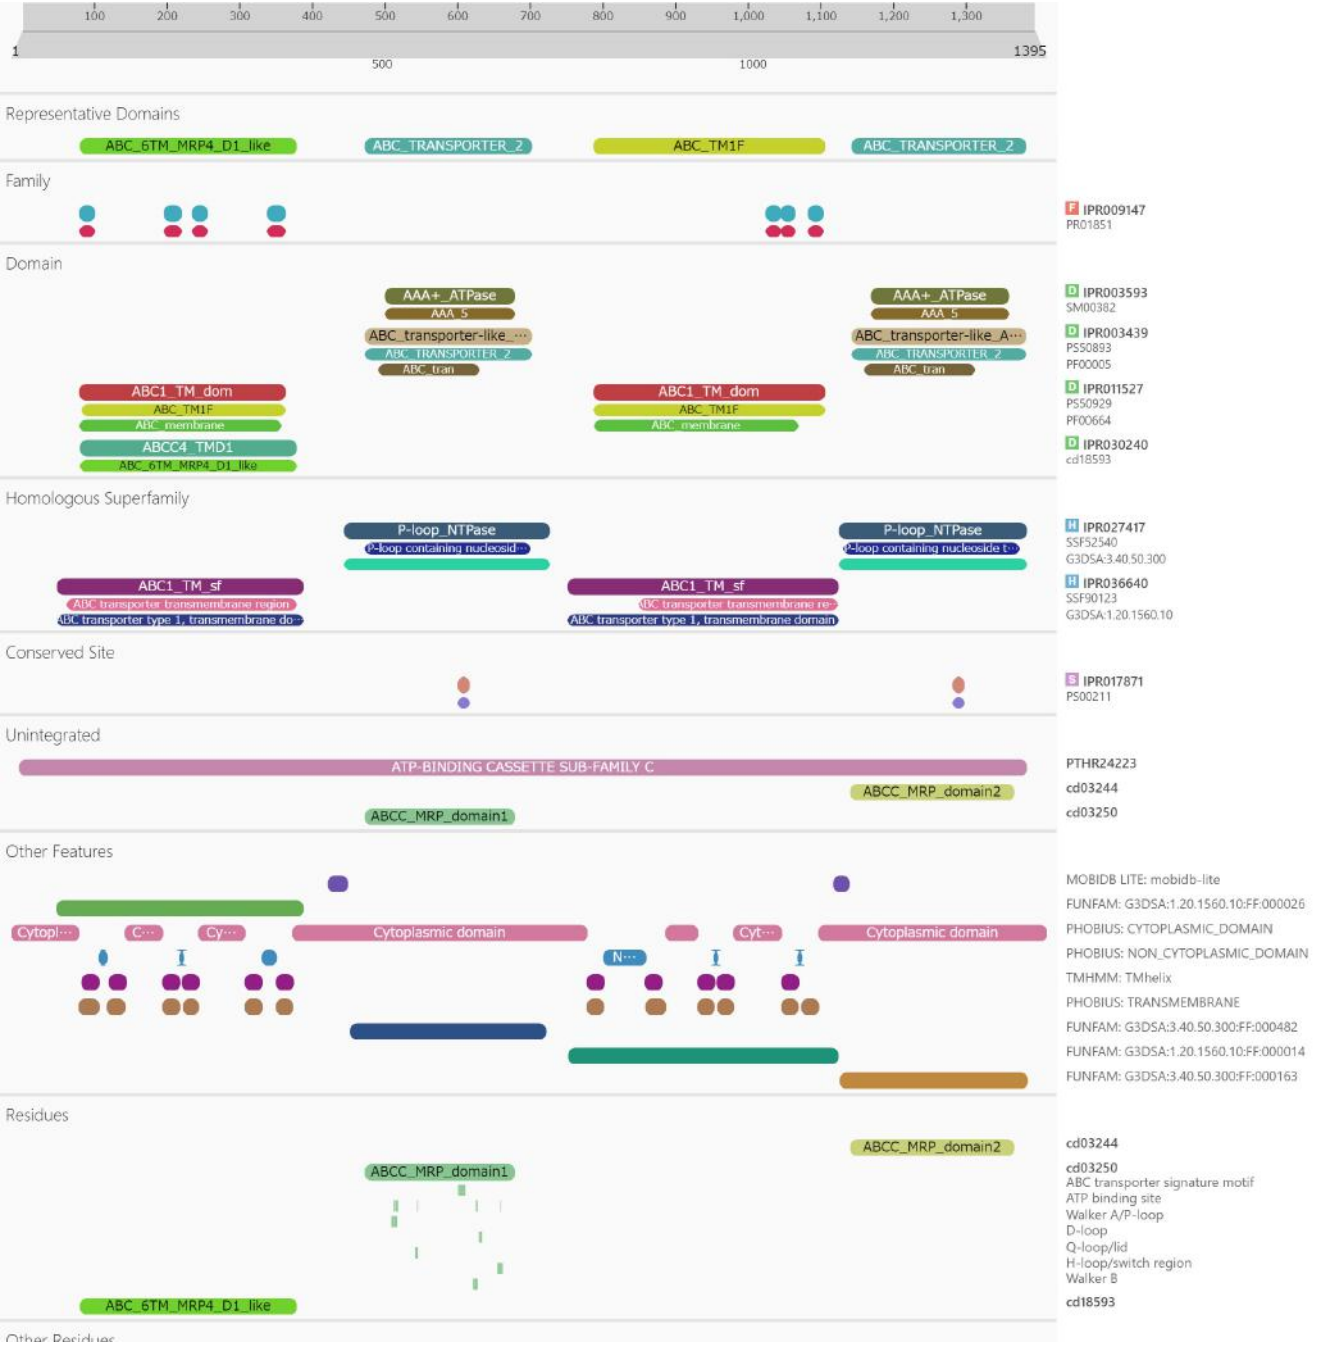

# ABCC4-like1

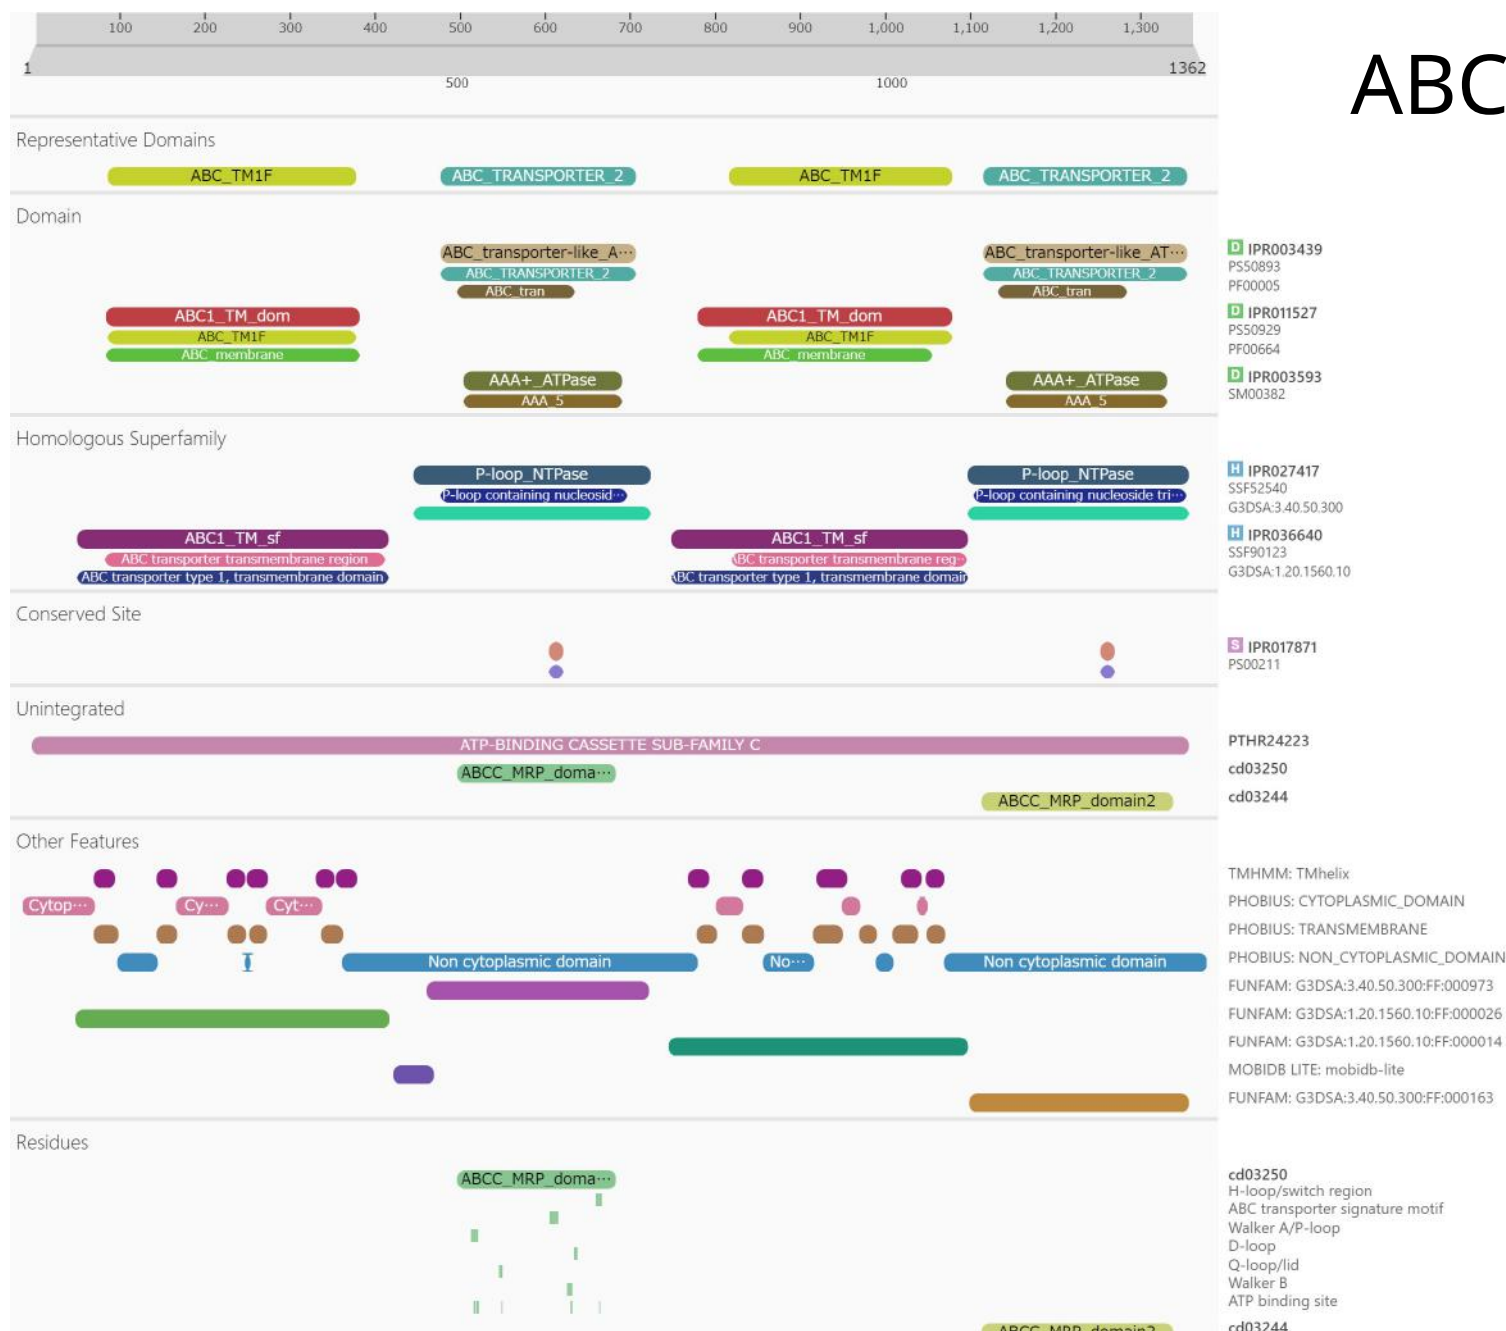



# ABCC4-like2

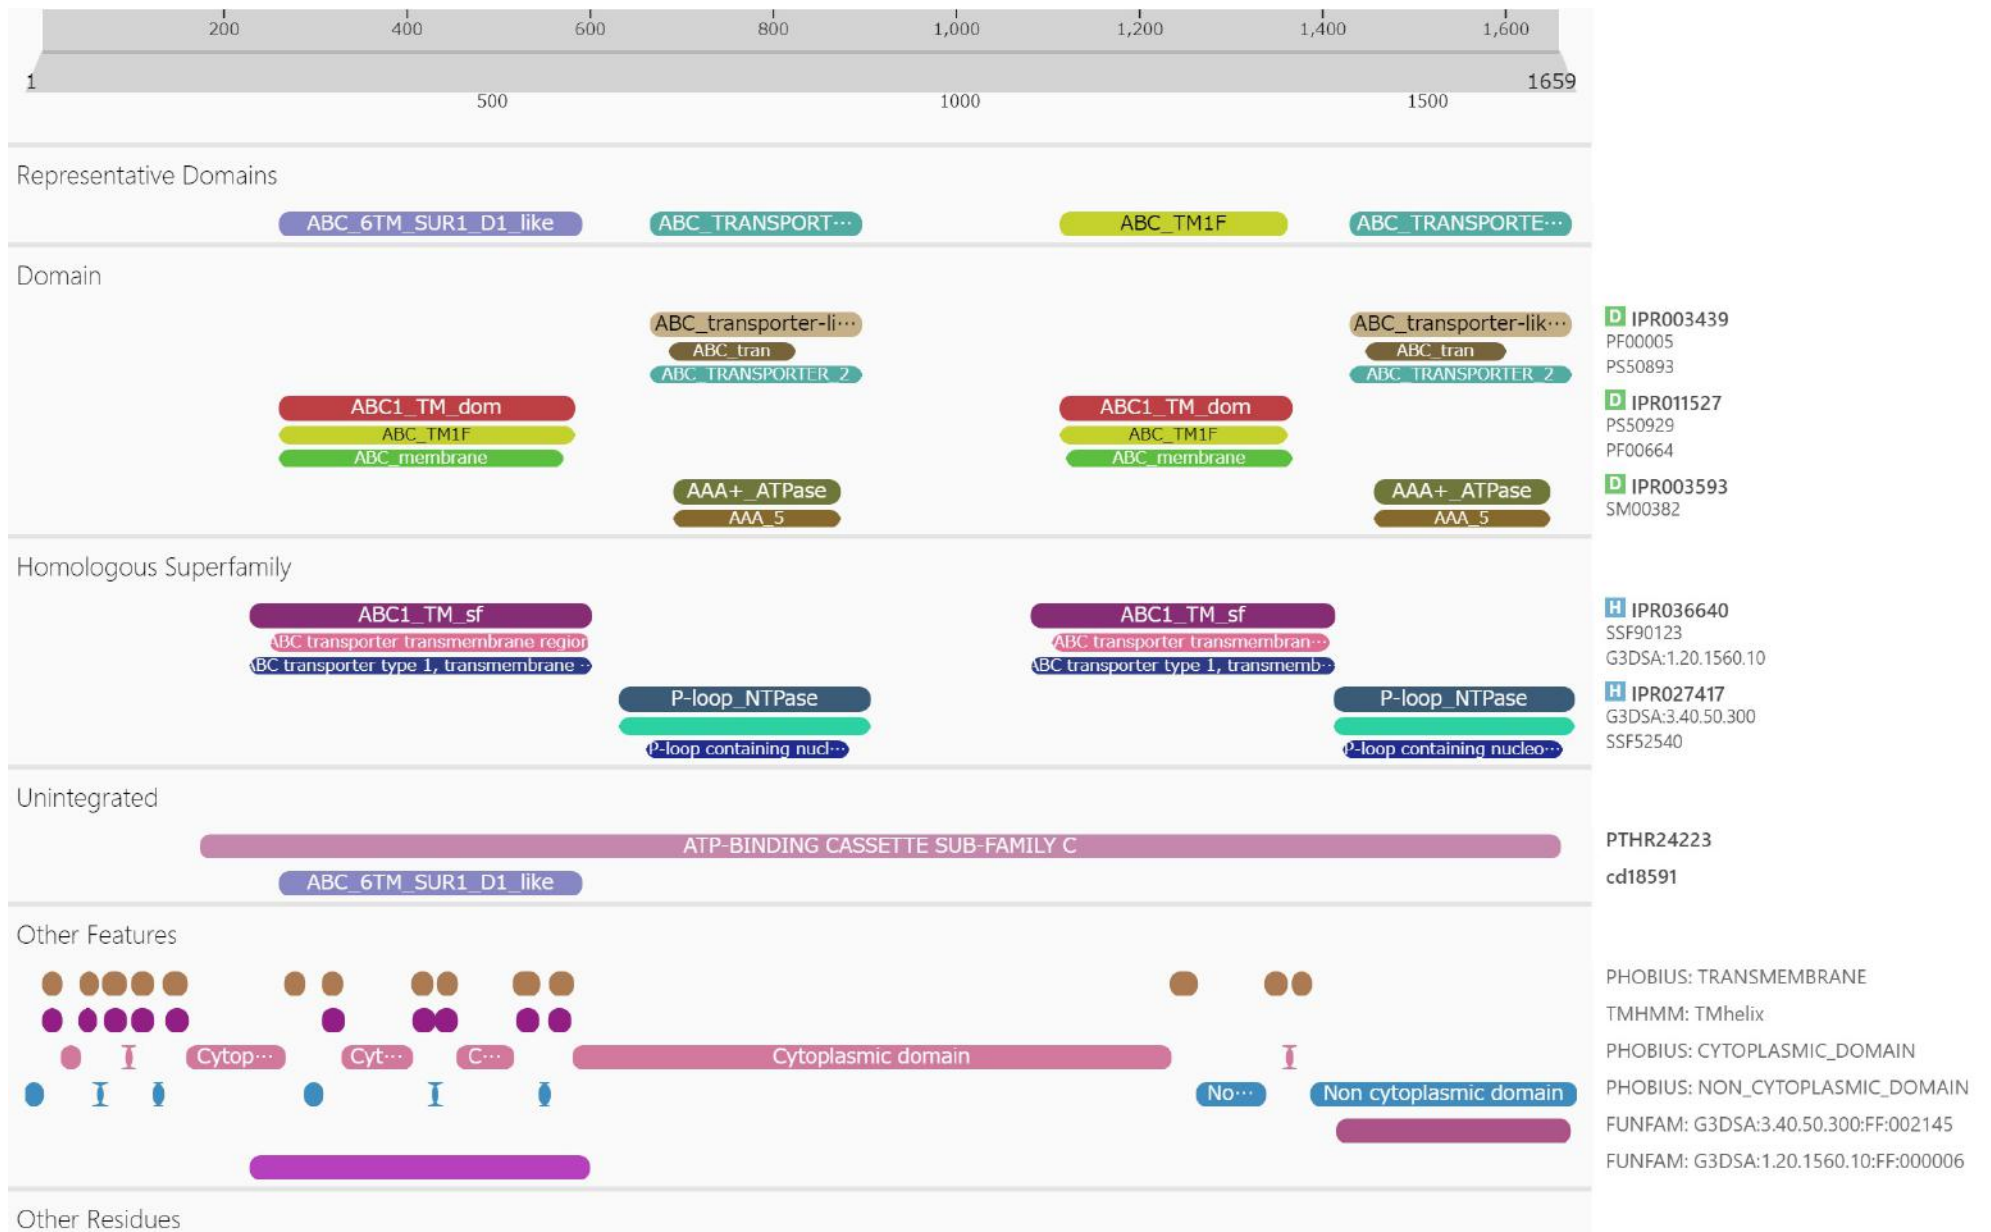

# ABCC9

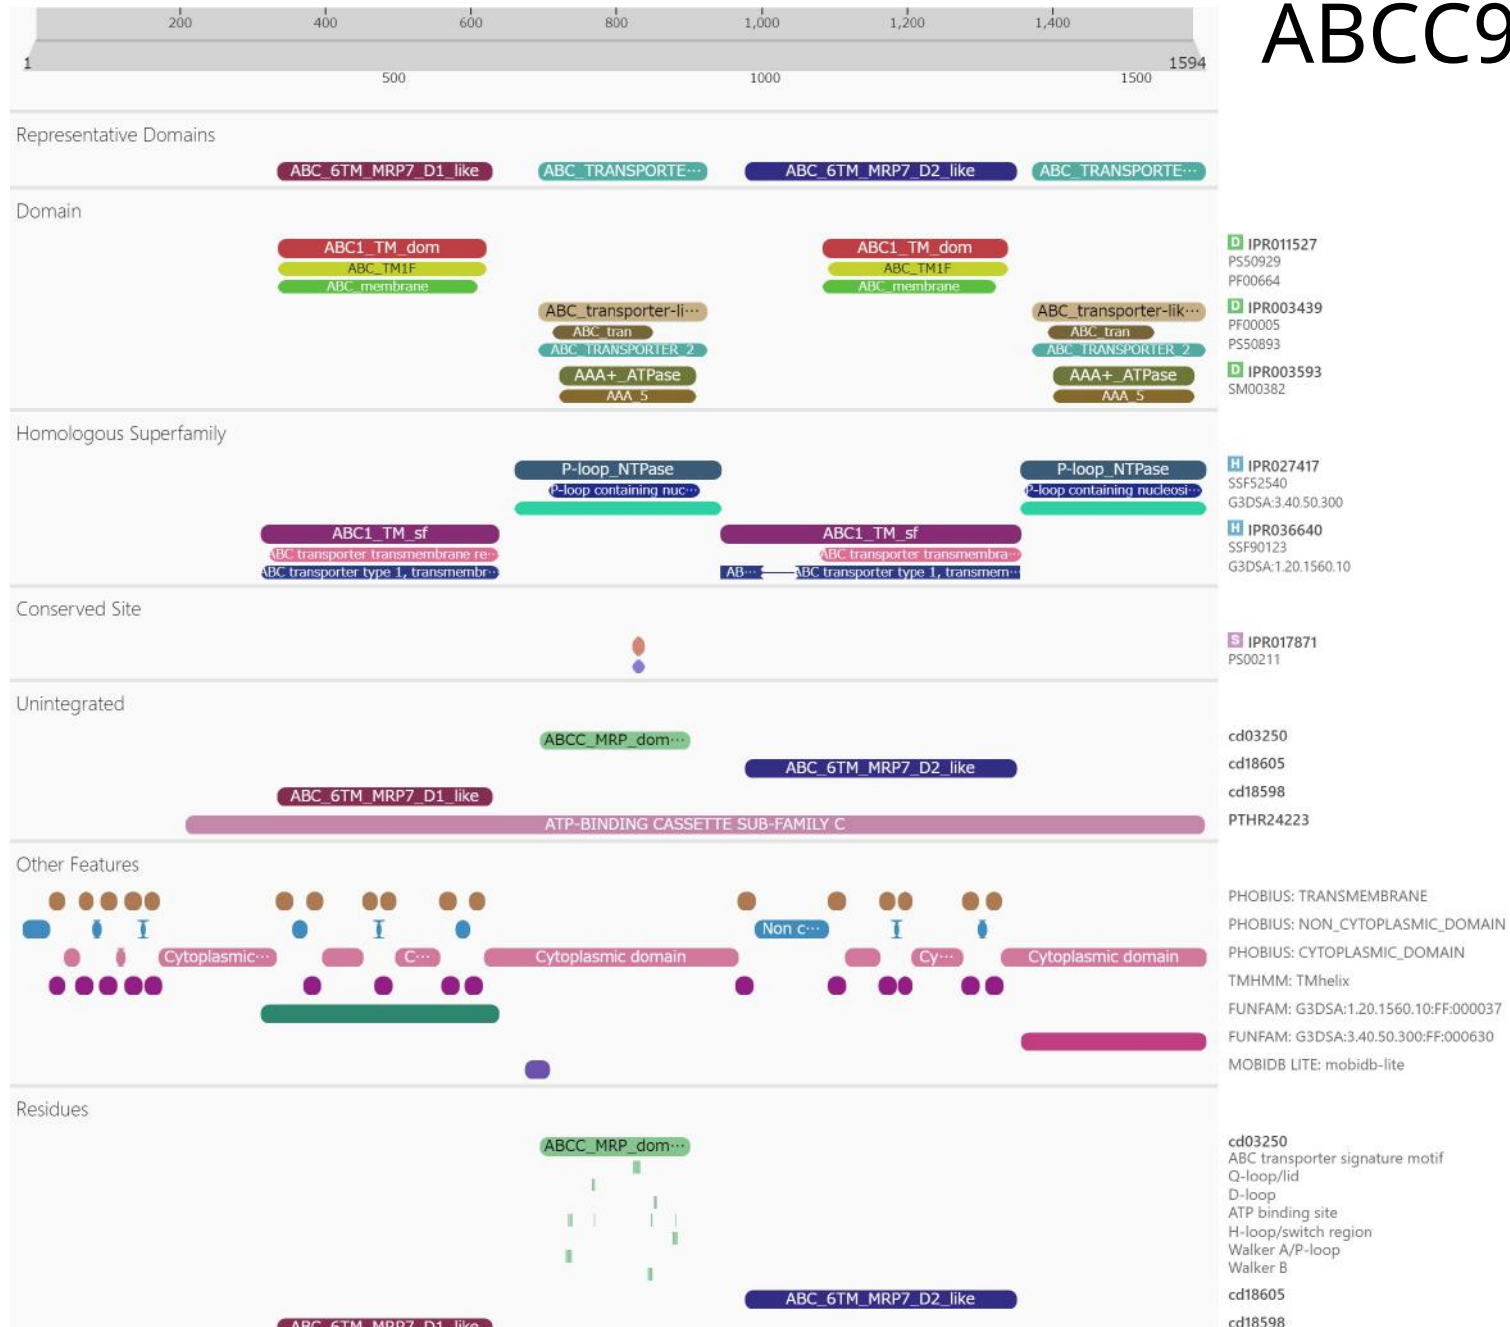

# ABCC10

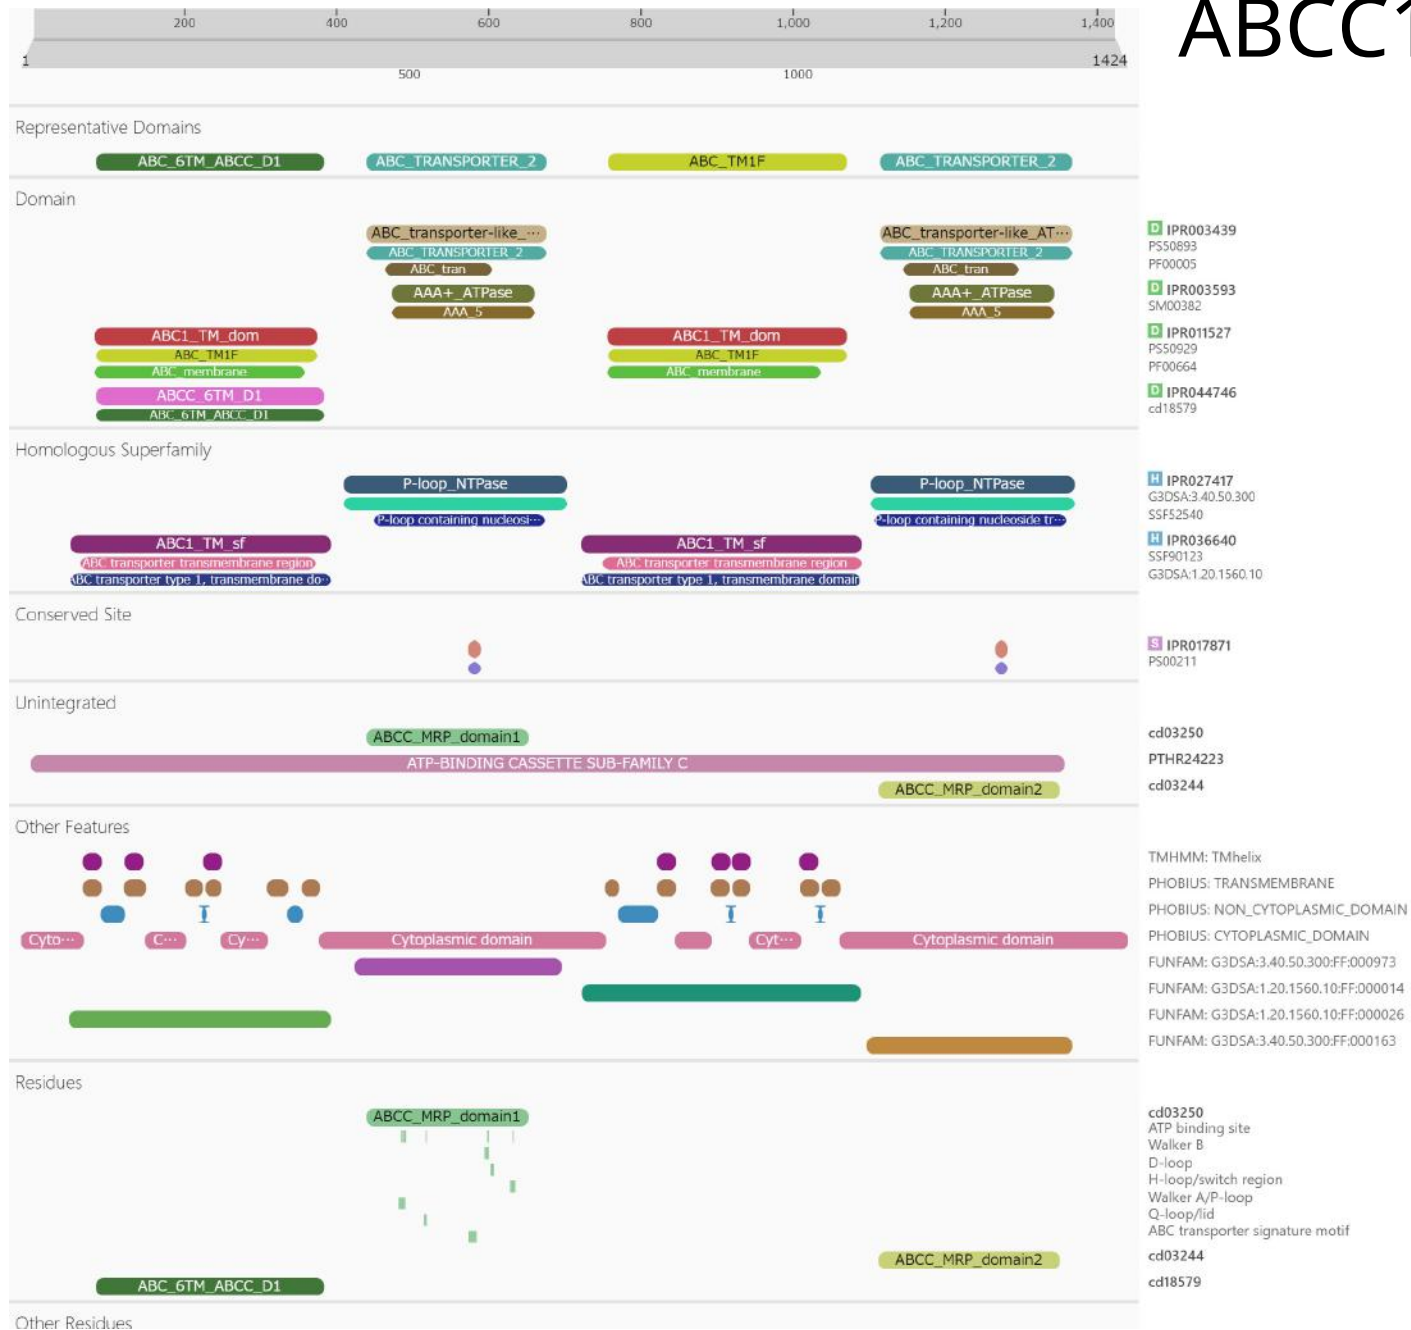

# ABCC11

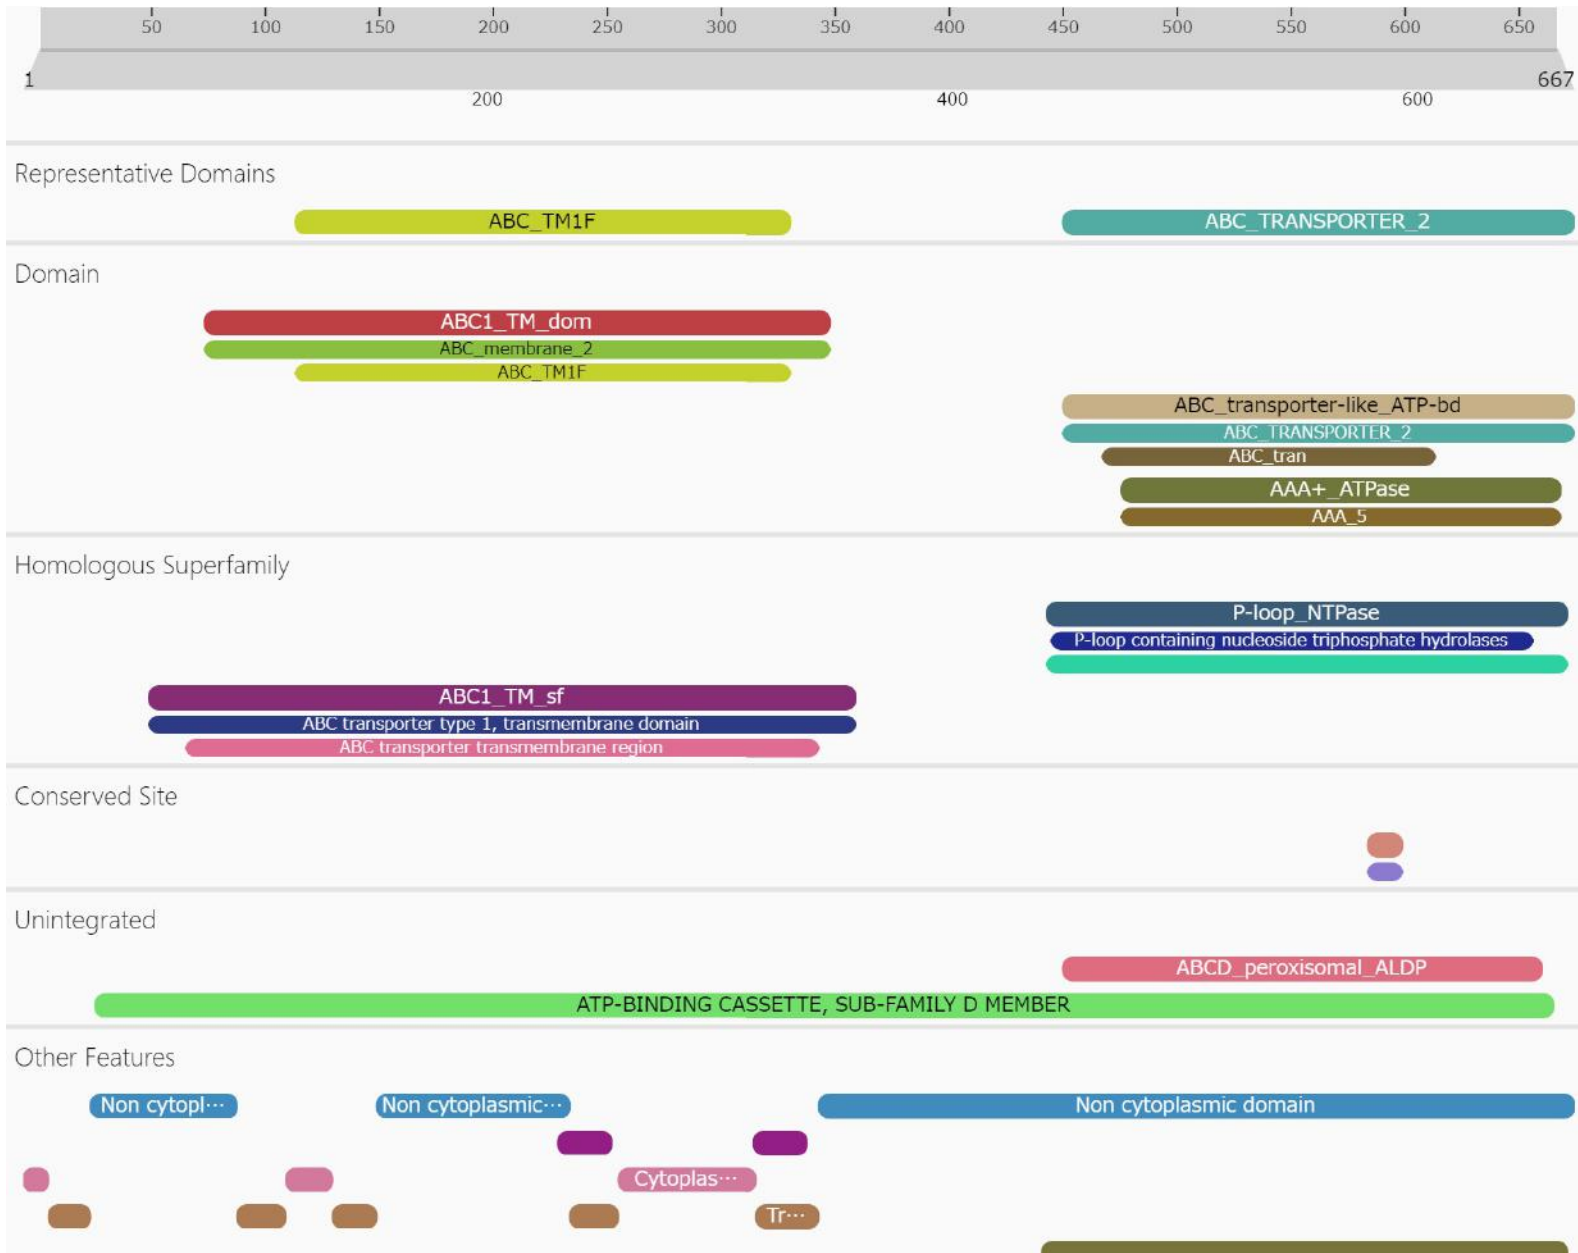

**D** IPR011527  
PF06472  
PS50929

**D** IPR003439  
PS50893  
PF00005

**D** IPR003593  
SM00382

**H** IPR027417  
SSF52540  
G3DSA:3.40.50.300

**H** IPR036640  
G3DSA:1.20.1560.10  
SSF90123

**S** IPR017871  
PS00211

cd03223  
PTHR11384

PHOBIUS: NON\_CYTOPLASMIC\_DOMAIN  
TMHMM: TMhelix  
PHOBIUS: CYTOPLASMIC\_DOMAIN  
PHOBIUS: TRANSMEMBRANE  
FUNFAM: G3DSA:3.40.50.300:FF:000636

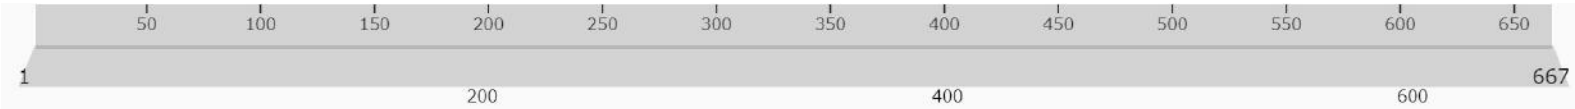

# ABCD1

## Representative Domains

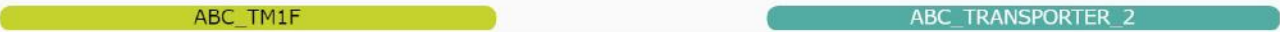

## Domain

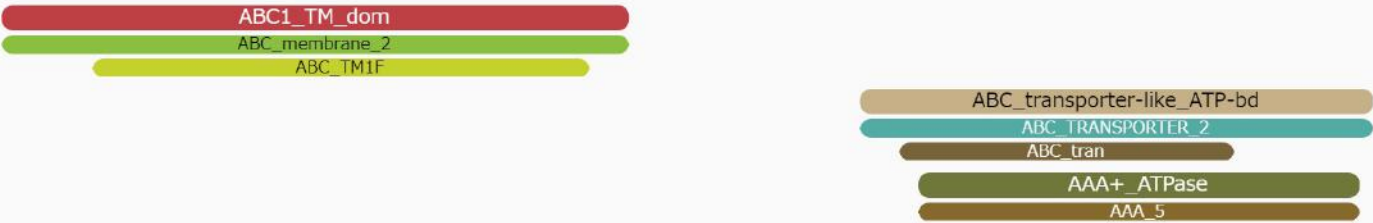

**D** IPR011527  
PF06472  
PS50929

**D** IPR003439  
PS50893  
PF00005

**D** IPR003593  
SM00382

## Homologous Superfamily

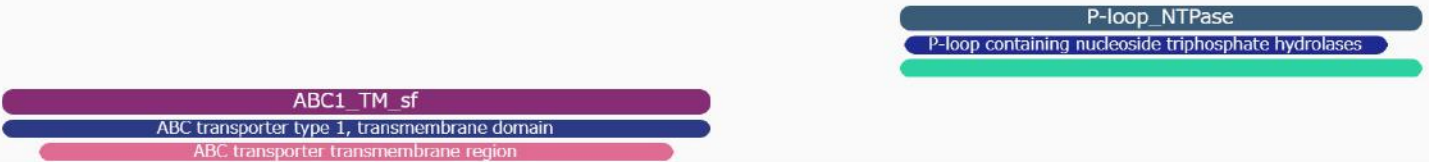

**H** IPR027417  
SSF52540  
G3DSA:3.40.50.300

**H** IPR036640  
G3DSA:1.20.1560.10  
SSF90123

## Conserved Site

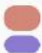

**S** IPR017871  
PS00211

## Unintegrated

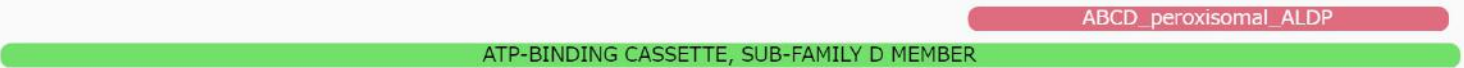

cd03223  
PTHR11384

## Other Features

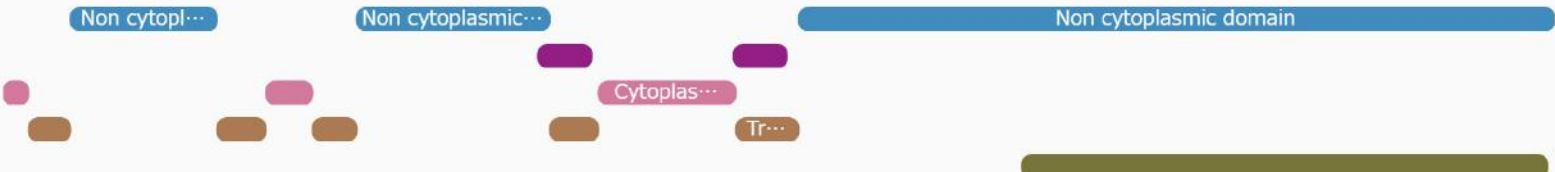

PHOBIUS: NON\_CYTOPLASMIC\_DOMAIN  
TMHMM: TMhelix  
PHOBIUS: CYTOPLASMIC\_DOMAIN  
PHOBIUS: TRANSMEMBRANE  
FUNFAM: G3DSA:3.40.50.300:FF:000636



# ABCD2

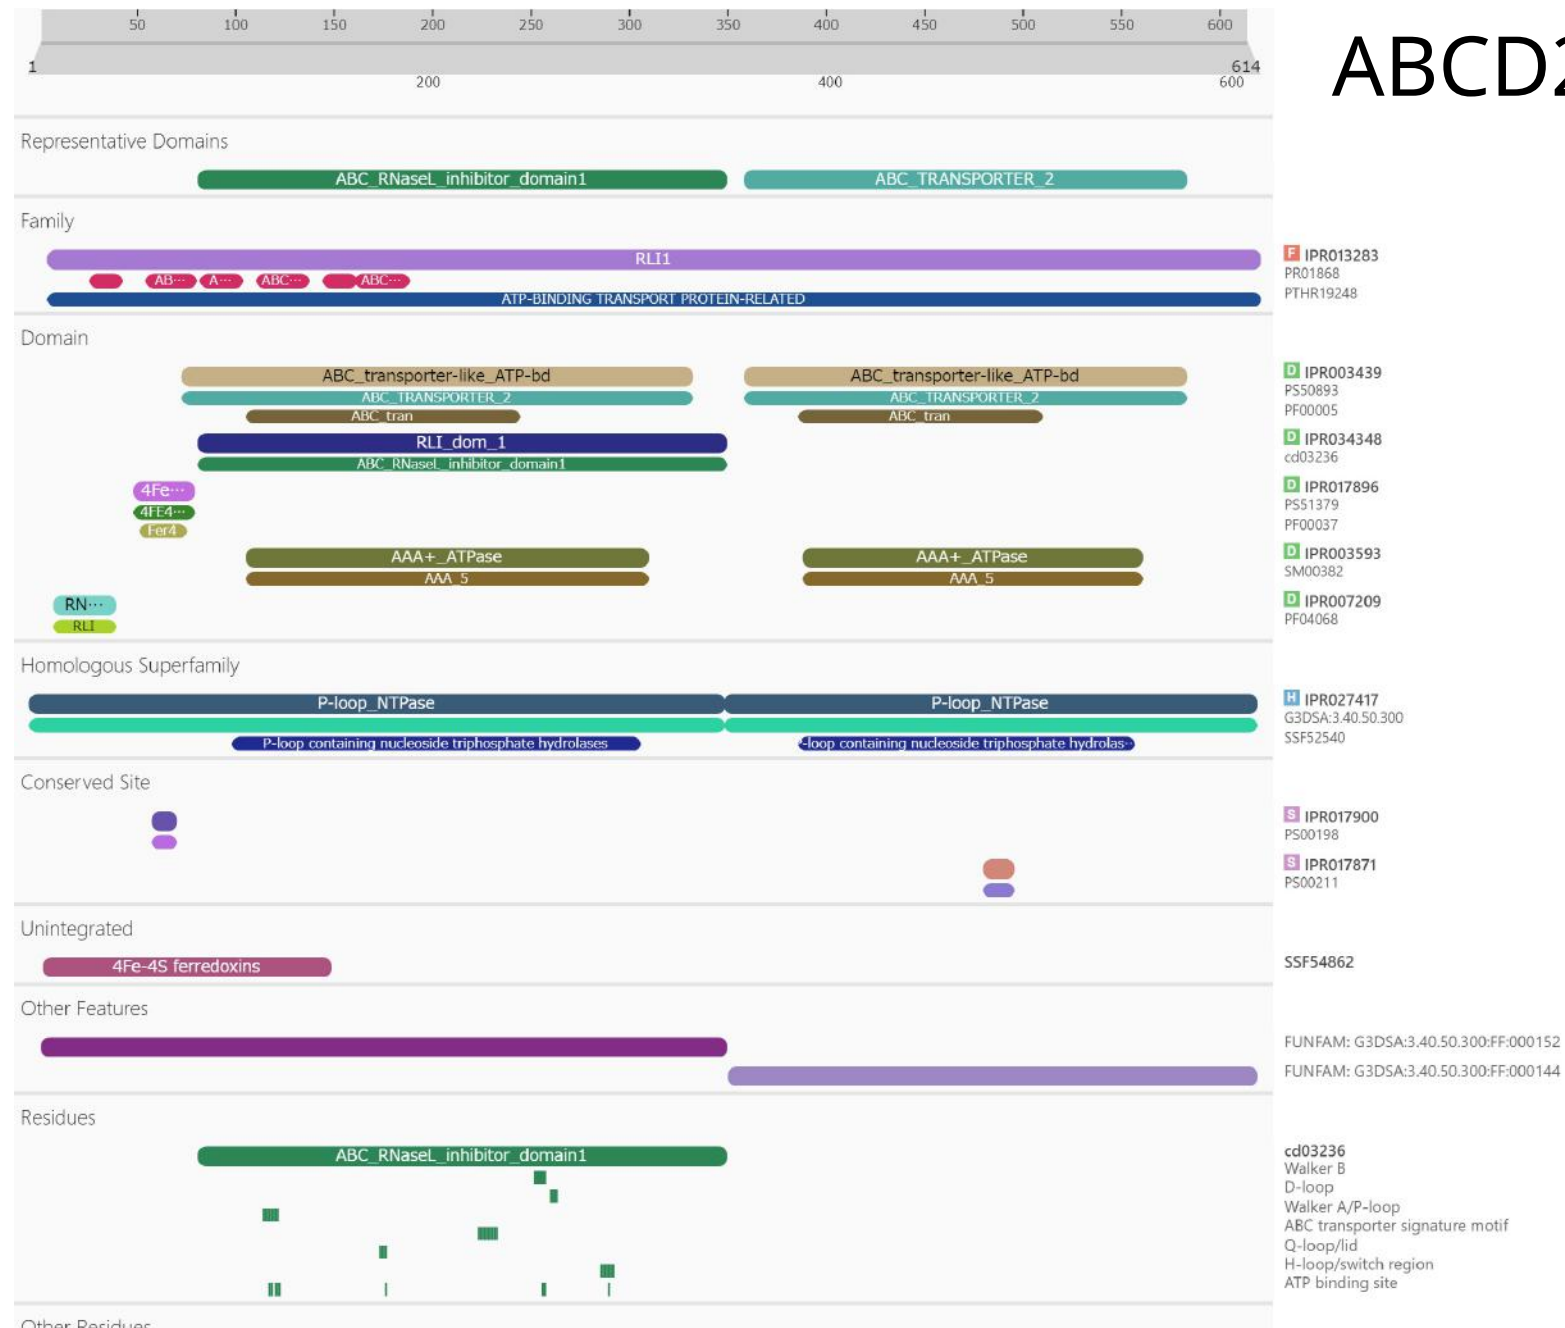

# ABCE1

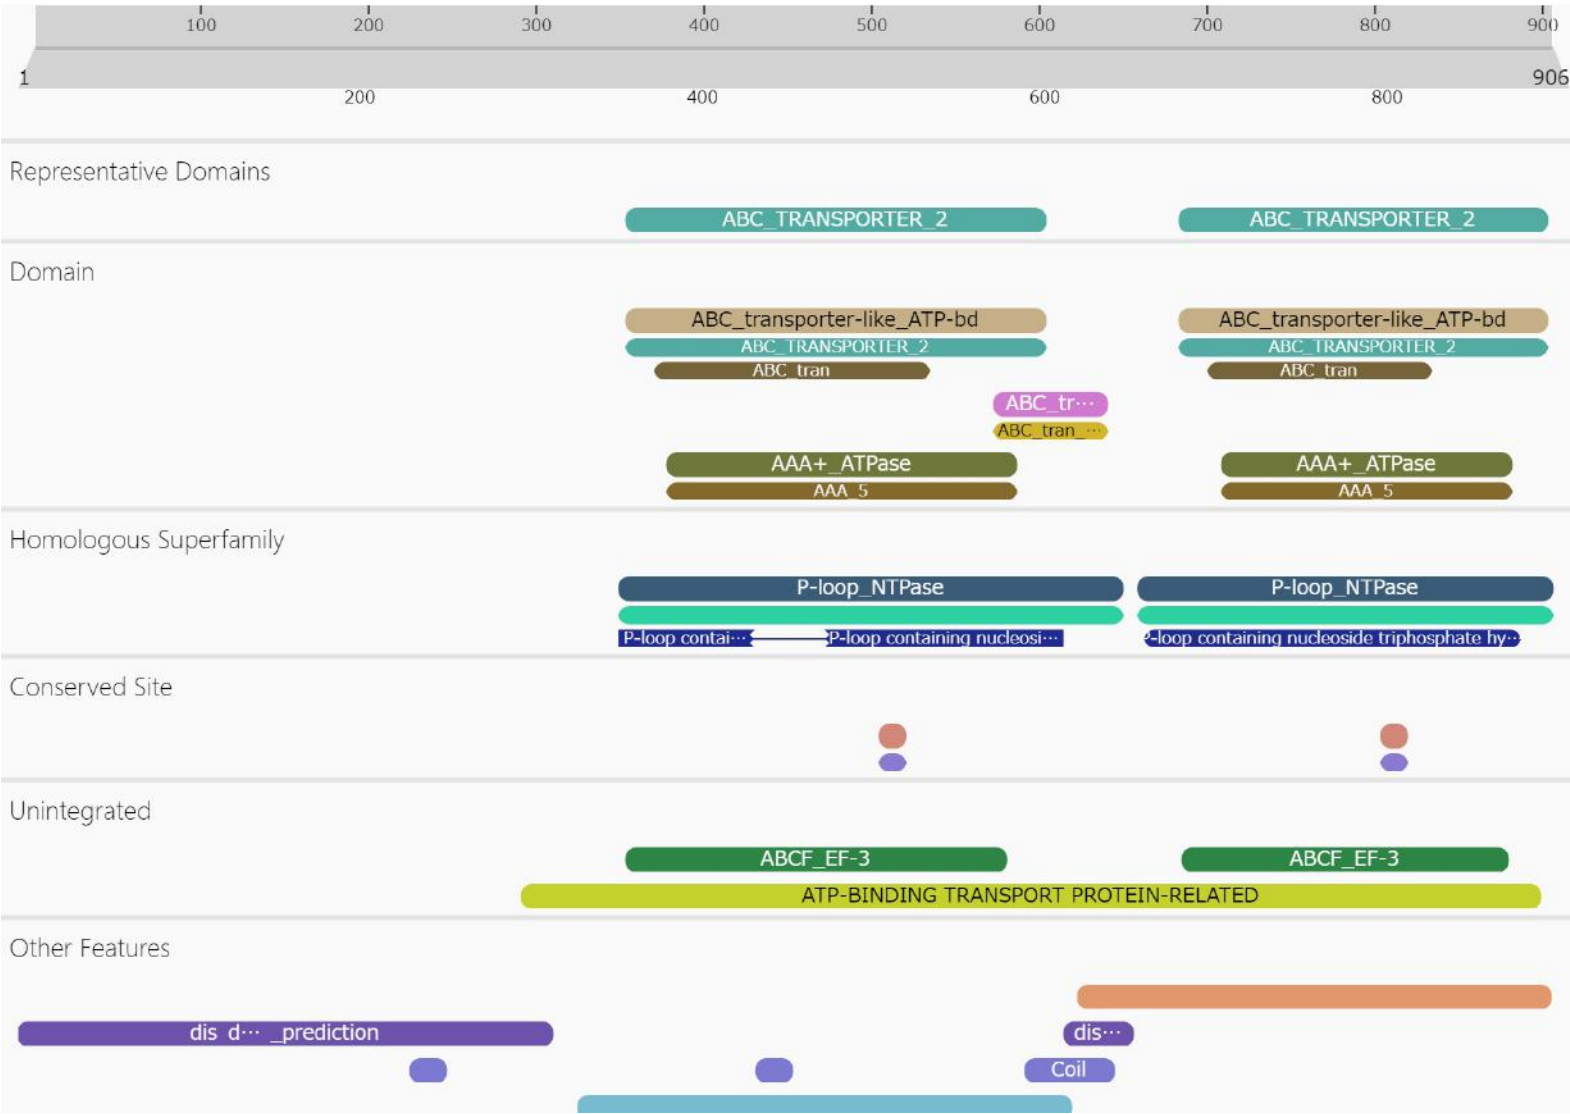

**D** IPR003439  
PS50893  
PF00005

**D** IPR032781  
PF12848

**D** IPR003593  
SM00382

**H** IPR027417  
G3DSA:3.40.50.300  
SSF52540

**S** IPR017871  
PS00211

cd03221  
PTHR19211

FUNFAM: G3DSA:3.40.50.300:FF:000471  
MOBIDB LITE: mobidb-lite  
COILS: Coil  
FUNFAM: G3DSA:3.40.50.300:FF:000472



# ABCF1

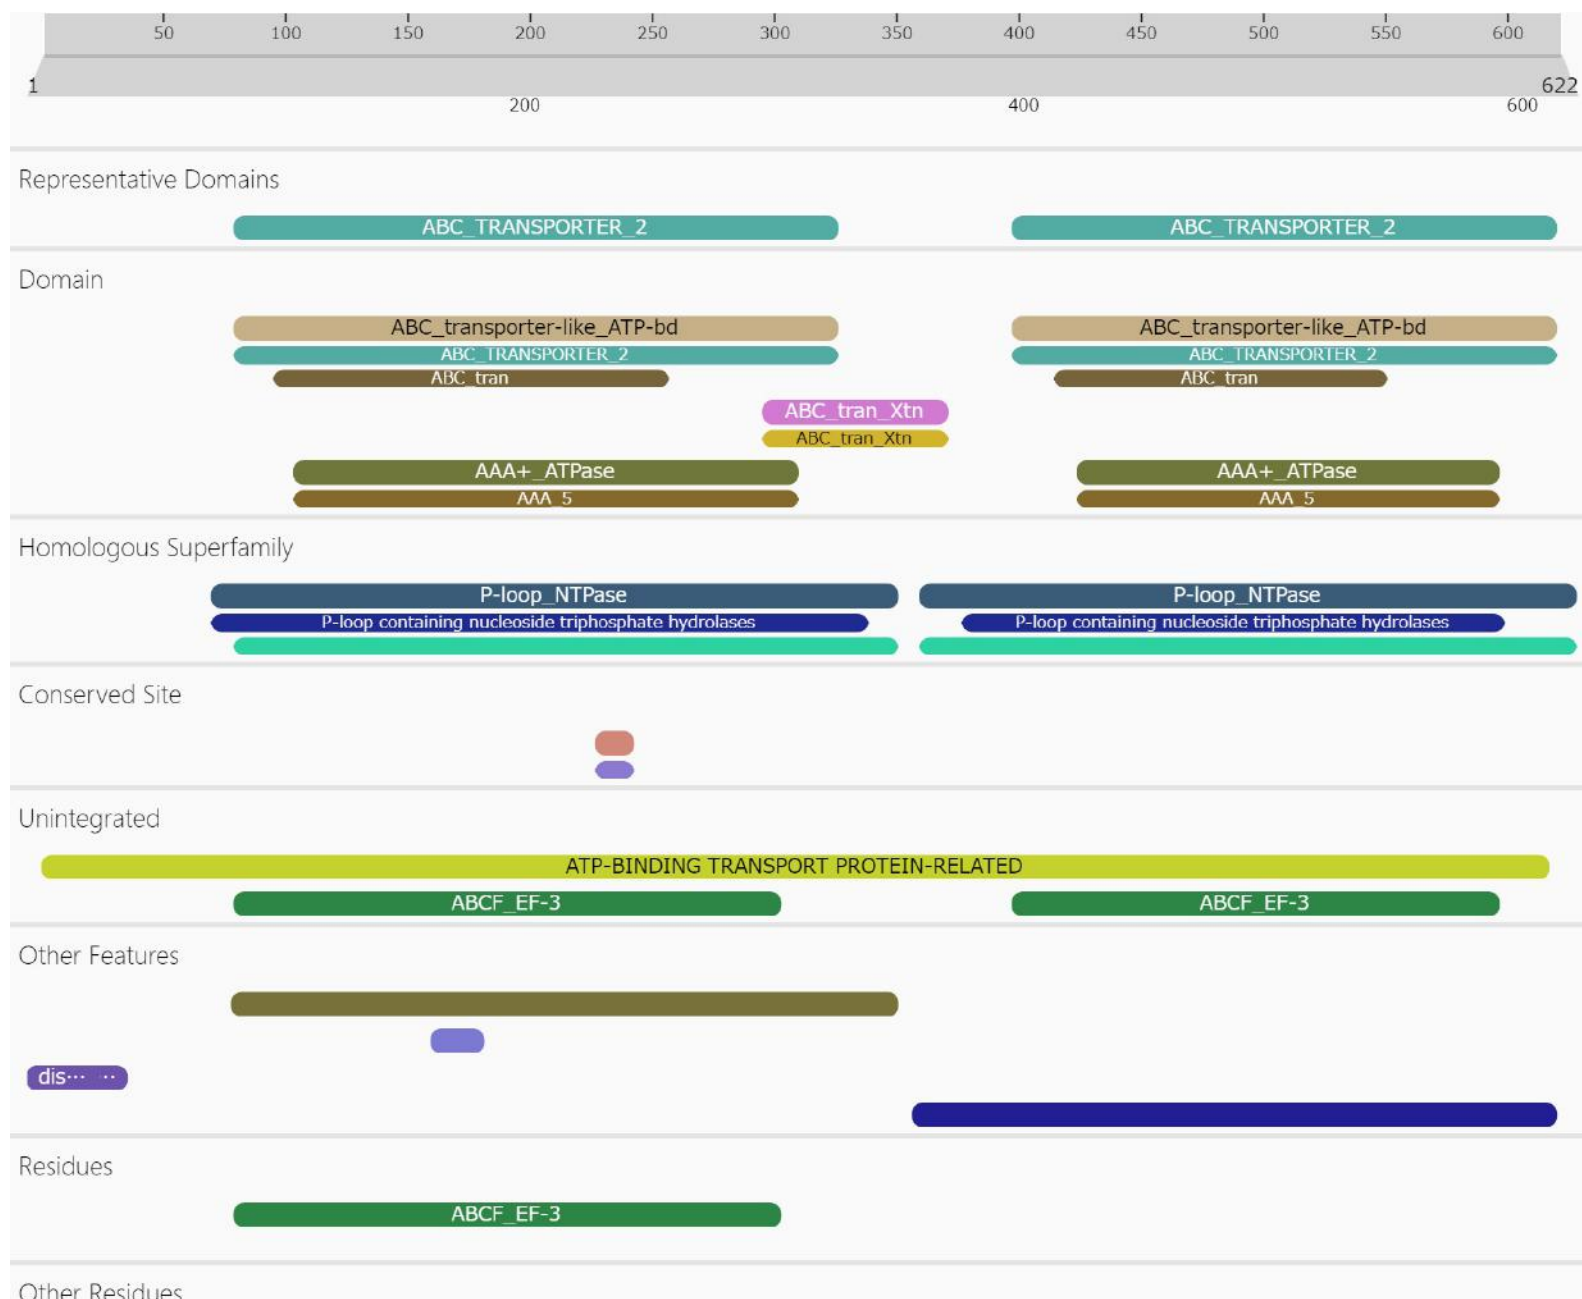

# ABCF2

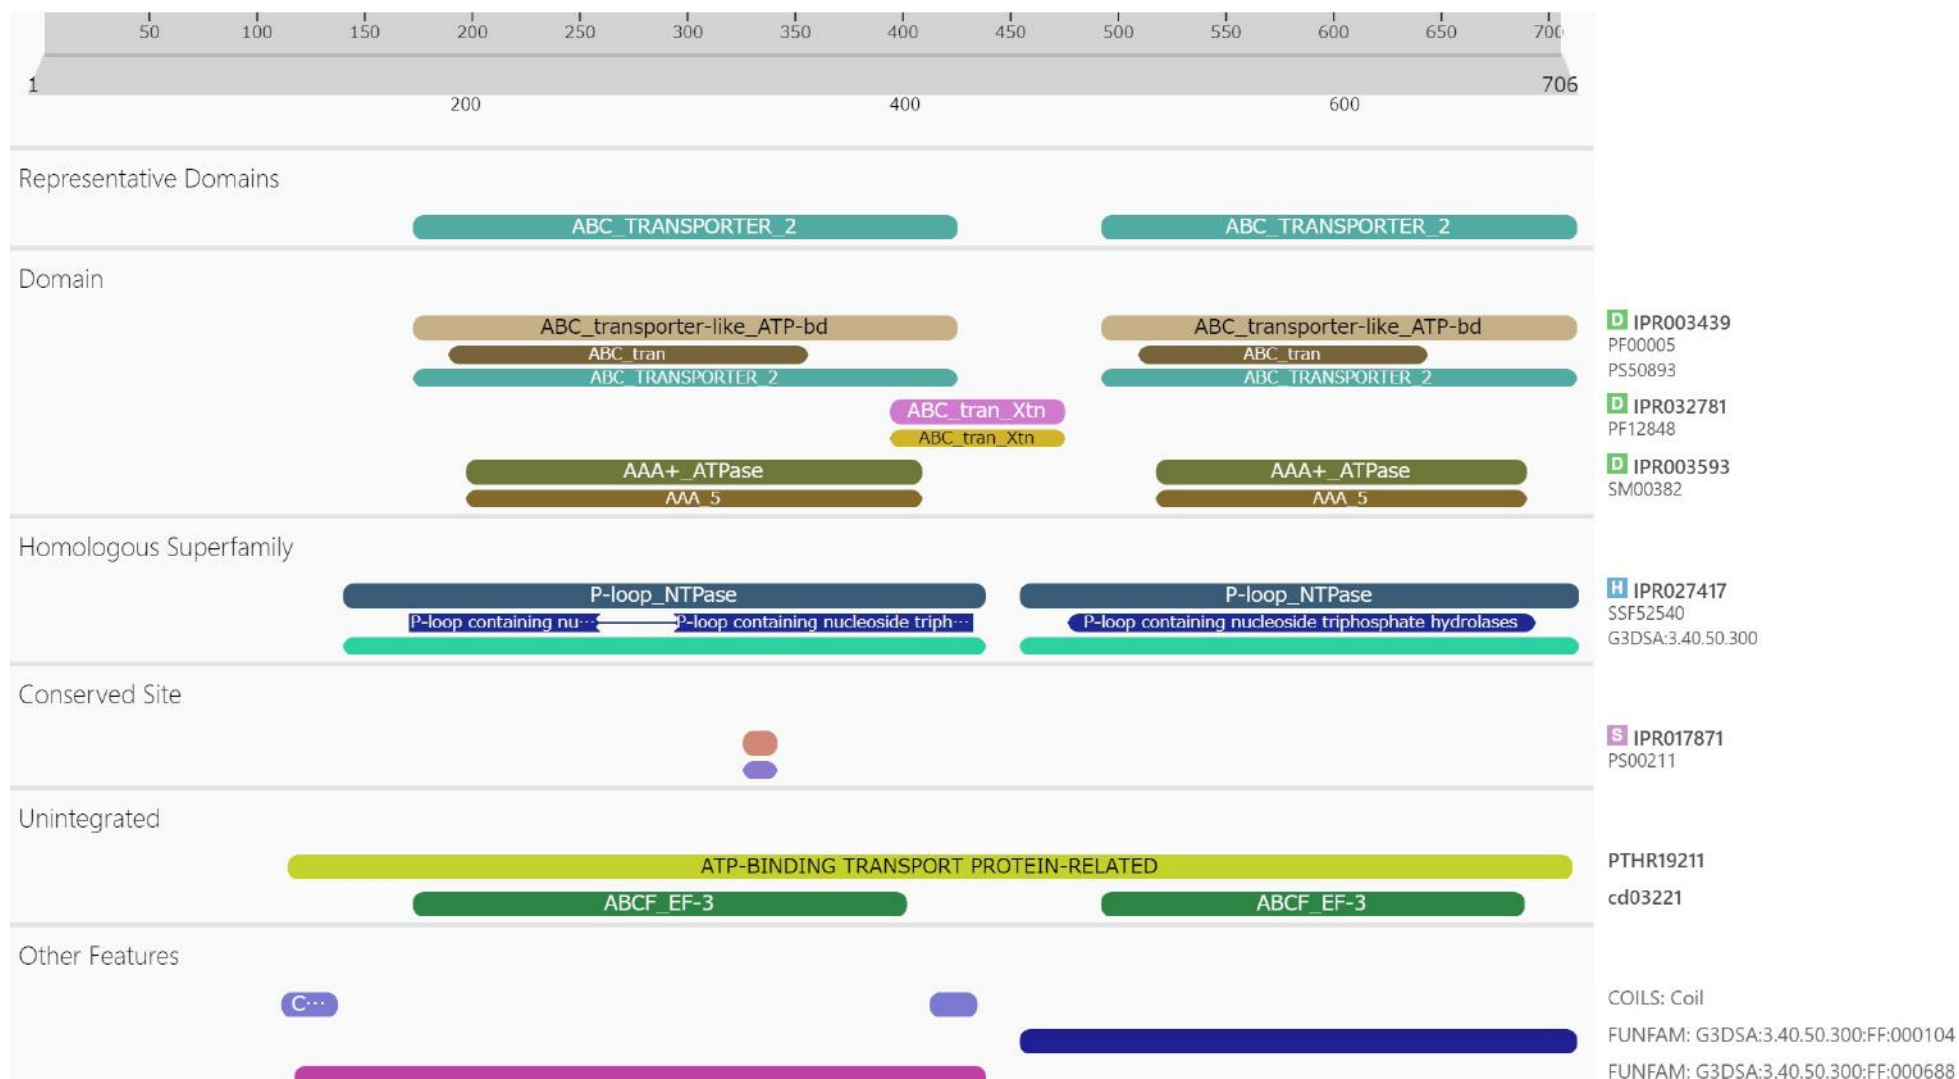

# ABCF3

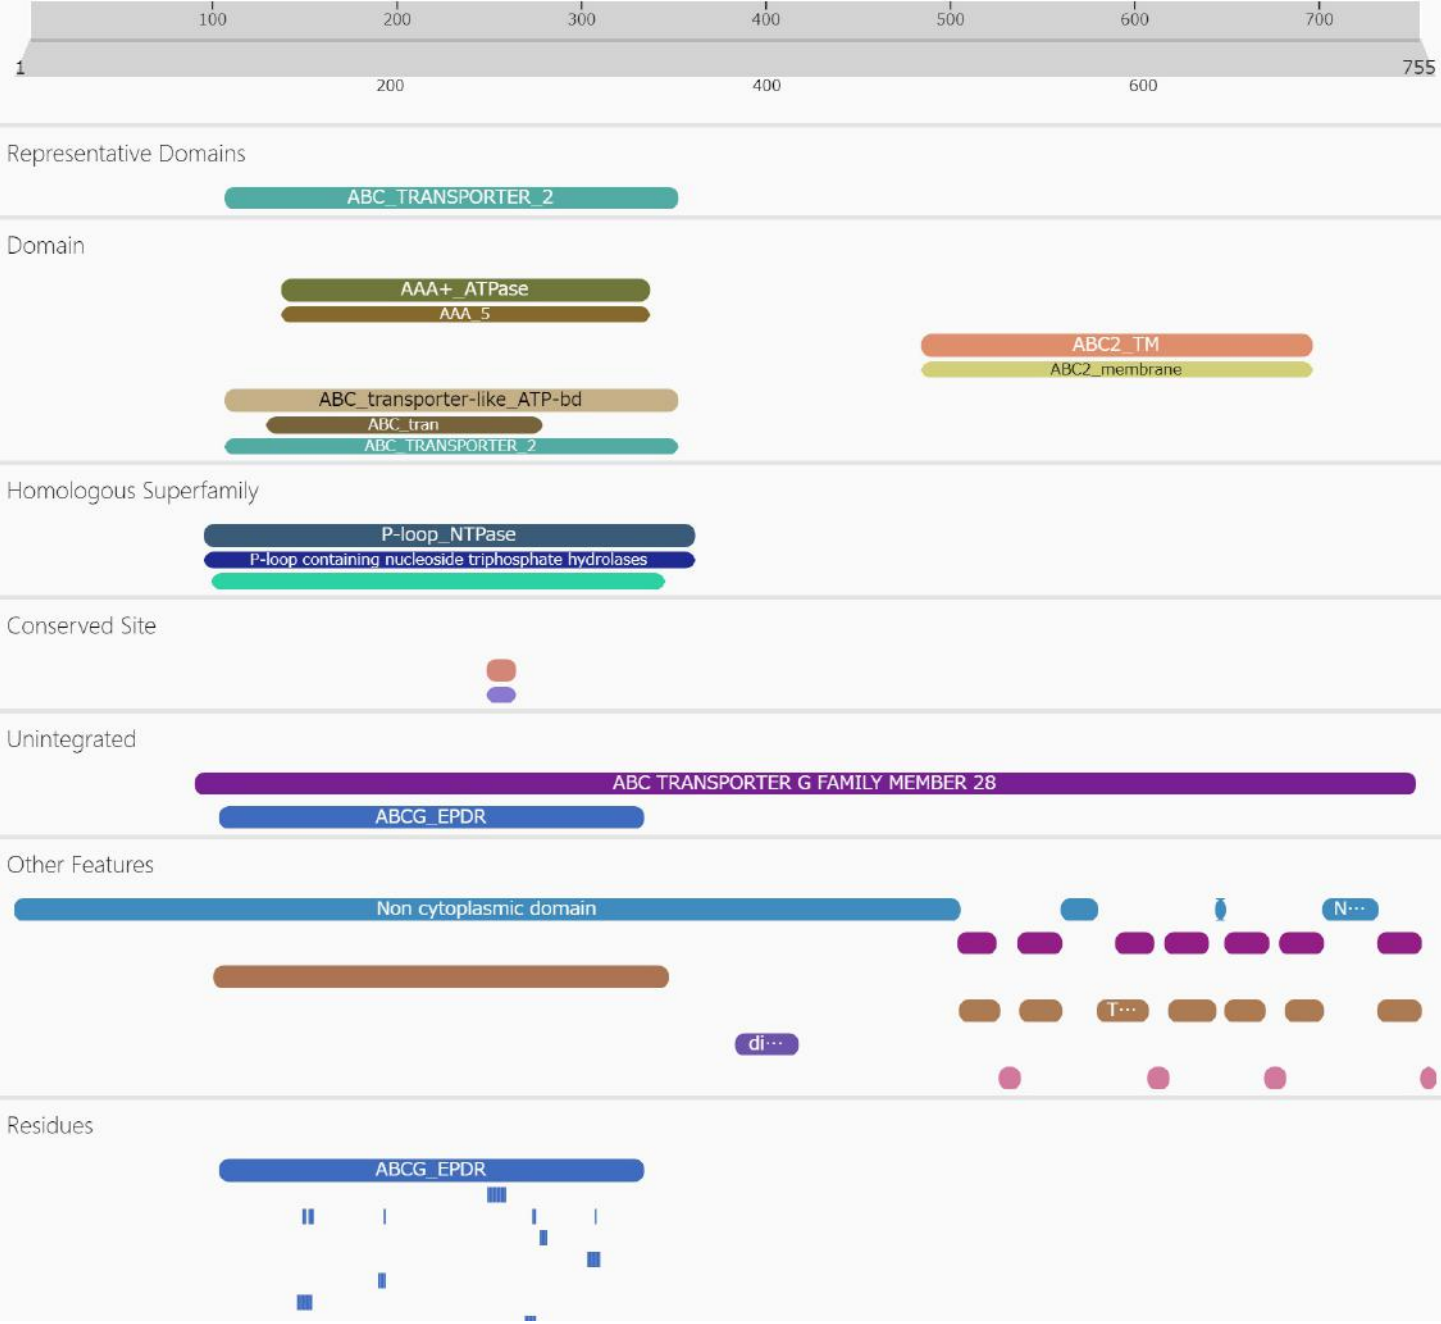

PS50893

**D** IPR003593  
SM00382

**D** IPR013525  
PF01061

**D** IPR003439  
PF00005  
PS50893

**H** IPR027417  
SSF52540  
G3DSA:3.40.50.300

**S** IPR017871  
PS00211

PTHR48041  
cd03213

PHOBIUS: NON\_CYTOPLASMIC\_DOMAIN  
TMHMM: TMhelix  
FUNFAM: G3DSA:3.40.50.300:FF:000891  
PHOBIUS: TRANSMEMBRANE  
MOBIDB LITE: mobidb-lite  
PHOBIUS: CYTOPLASMIC\_DOMAIN

cd03213  
ABC transporter signature motif  
ATP binding site  
D-loop  
H-loop/switch region  
Q-loop/lid  
Walker A/P-loop  
Walker B

# ABCG1

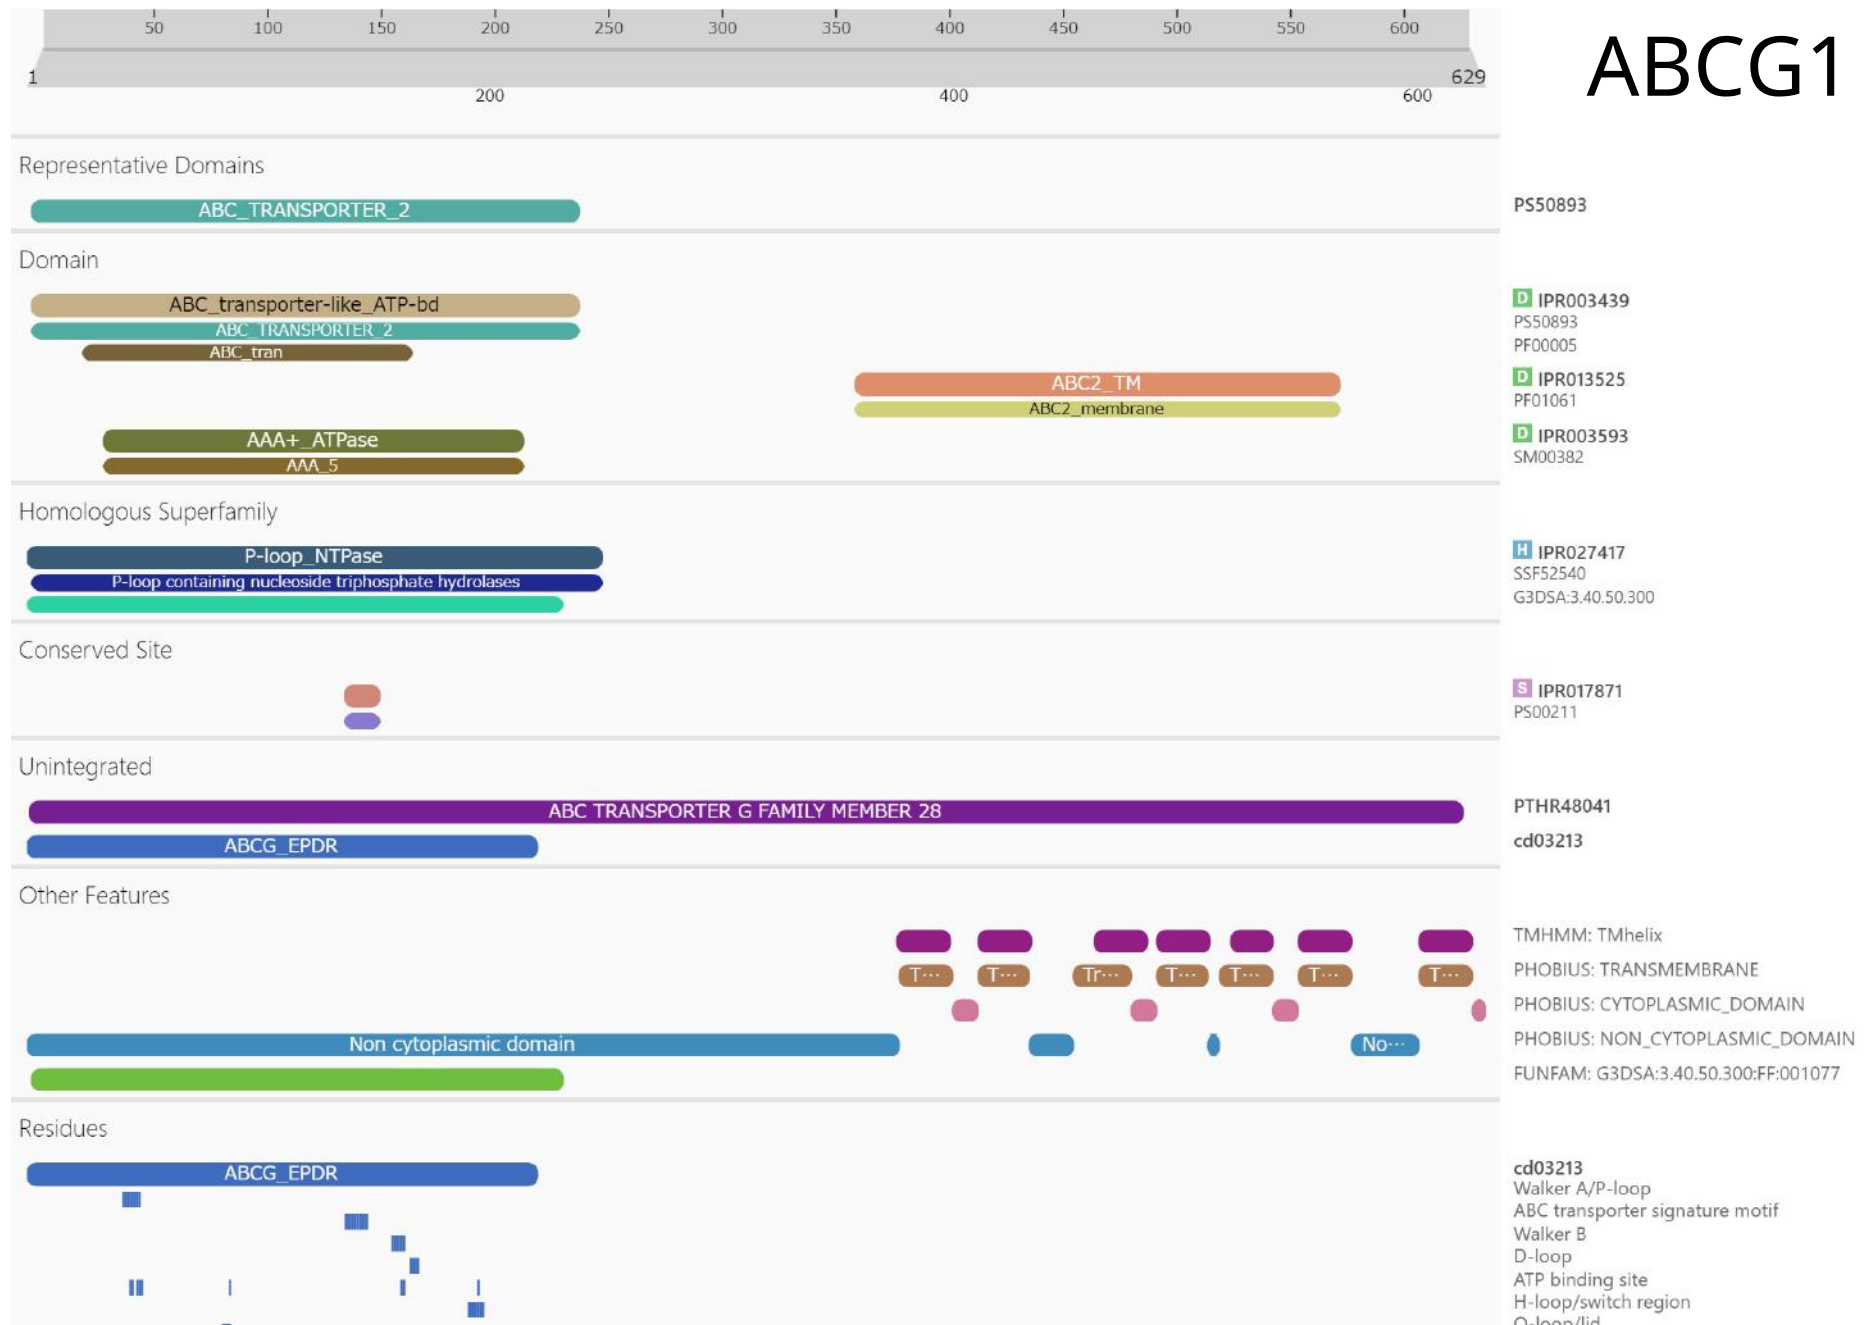

# ABCG2

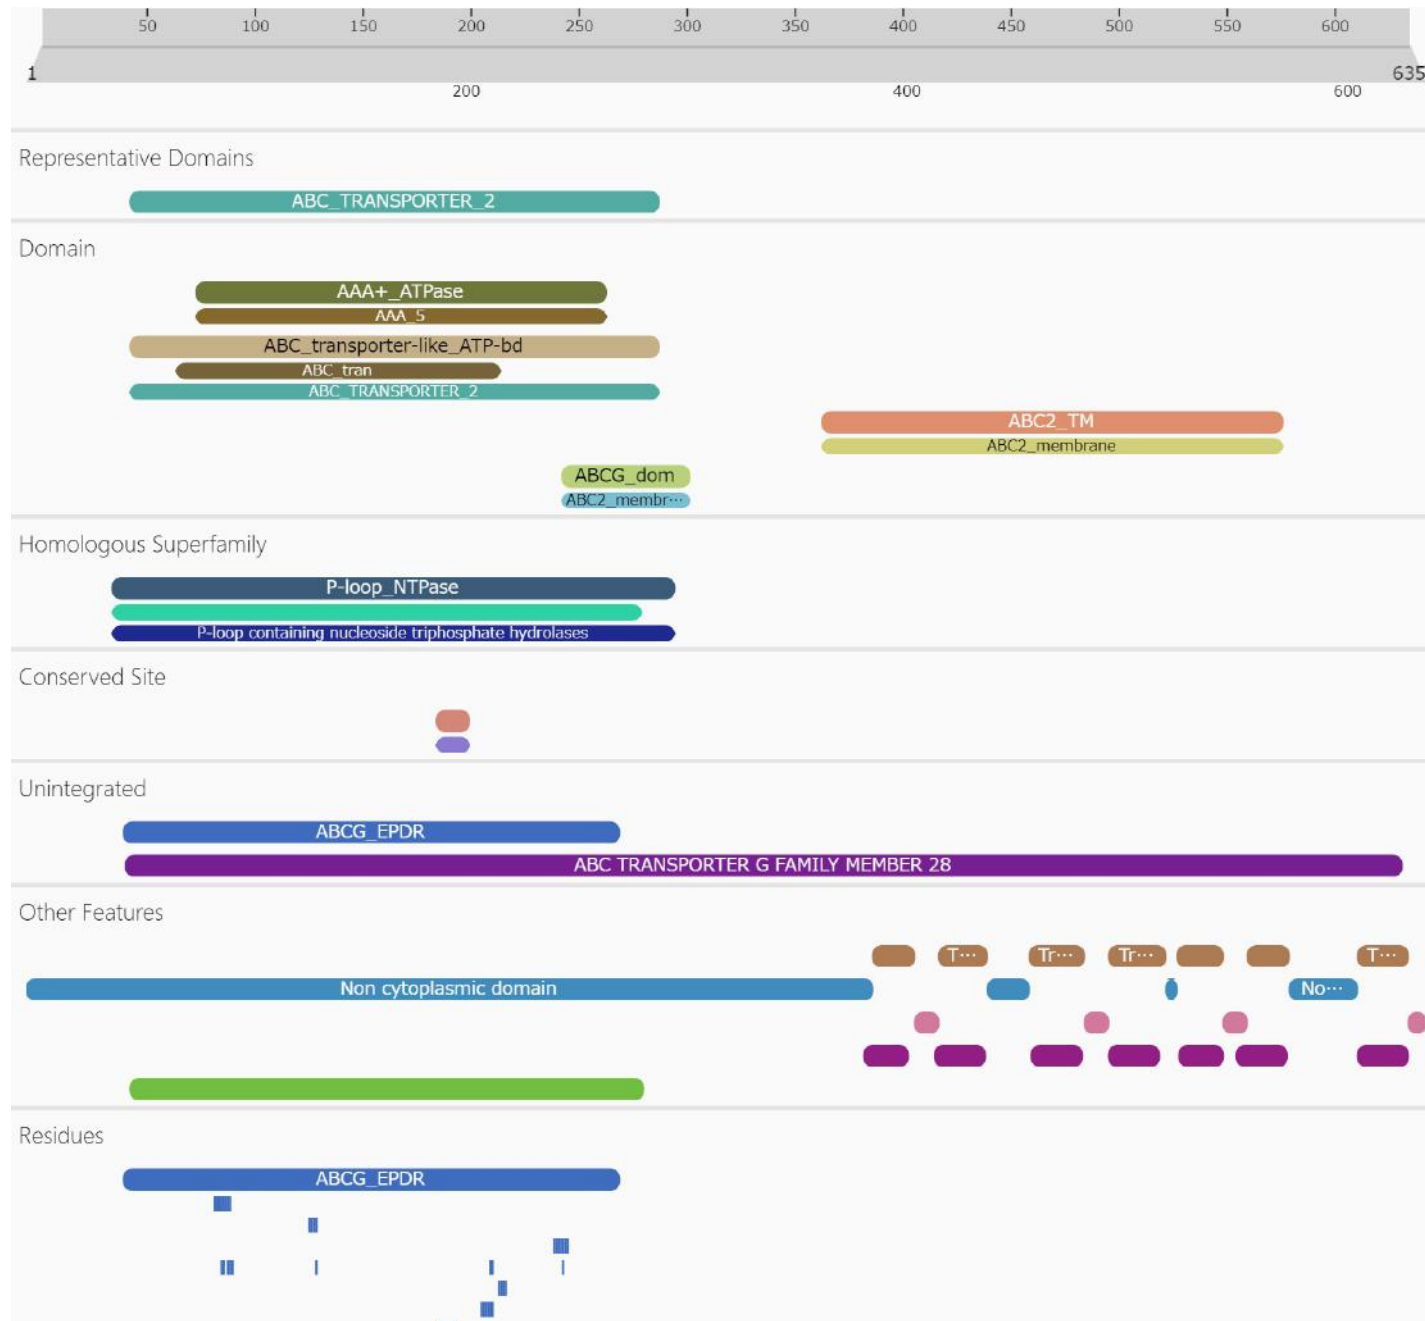

PS50893

**D** IPR003593  
SM00382

**D** IPR003439  
PF00005  
PS50893

**D** IPR013525  
PF01061

**D** IPR043926  
PF19055

**H** IPR027417  
G3DSA:3.40.50.300  
SSF52540

**S** IPR017871  
PS00211

cd03213

PTHR48041

PHOBIUS: TRANSMEMBRANE  
PHOBIUS: NON\_CYTOPLASMIC\_DOMAIN  
PHOBIUS: CYTOPLASMIC\_DOMAIN  
TMHMM: TMhelix  
FUNFAM: G3DSA:3.40.50.300:FF:001077

cd03213  
Walker A/P-loop  
Q-loop/lid  
H-loop/switch region  
ATP binding site  
D-loop  
Walker B  
ABC transporter signature motif

# ABCG3

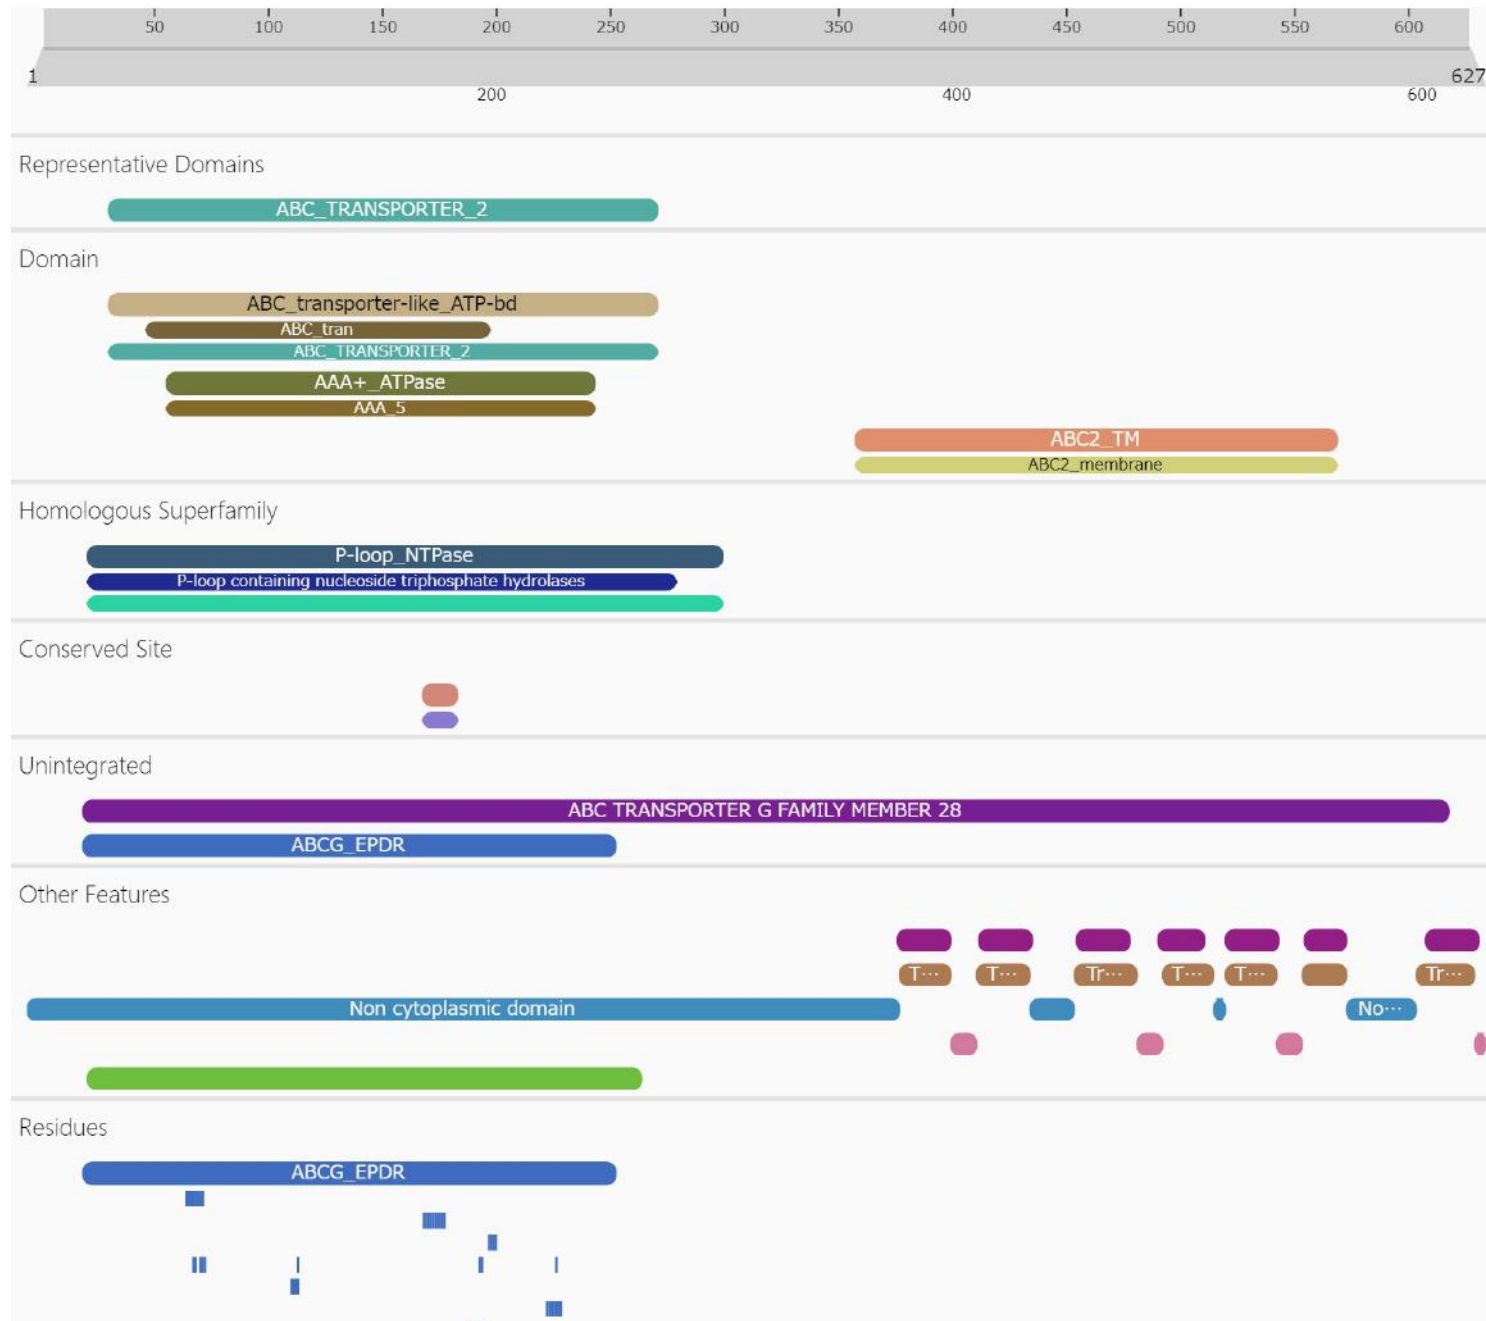

PS50893

**D** IPR003439

PF00005

PS50893

**D** IPR003593

SM00382

**D** IPR013525

PF01061

**H** IPR027417

SSF52540

G3DSA:3.40.50.300

**S** IPR017871

PS00211

PTHR48041

cd03213

TMHMM: TMhelix

PHOBIUS: TRANSMEMBRANE

PHOBIUS: NON\_CYTOPLASMIC\_DOMAIN

PHOBIUS: CYTOPLASMIC\_DOMAIN

FUNFAM: G3DSA:3.40.50.300:FF:001077

cd03213

Walker A/P-loop

ABC transporter signature motif

D-loop

ATP binding site

Q-loop/lid

H-loop/switch region

Walker B

# ABCG4

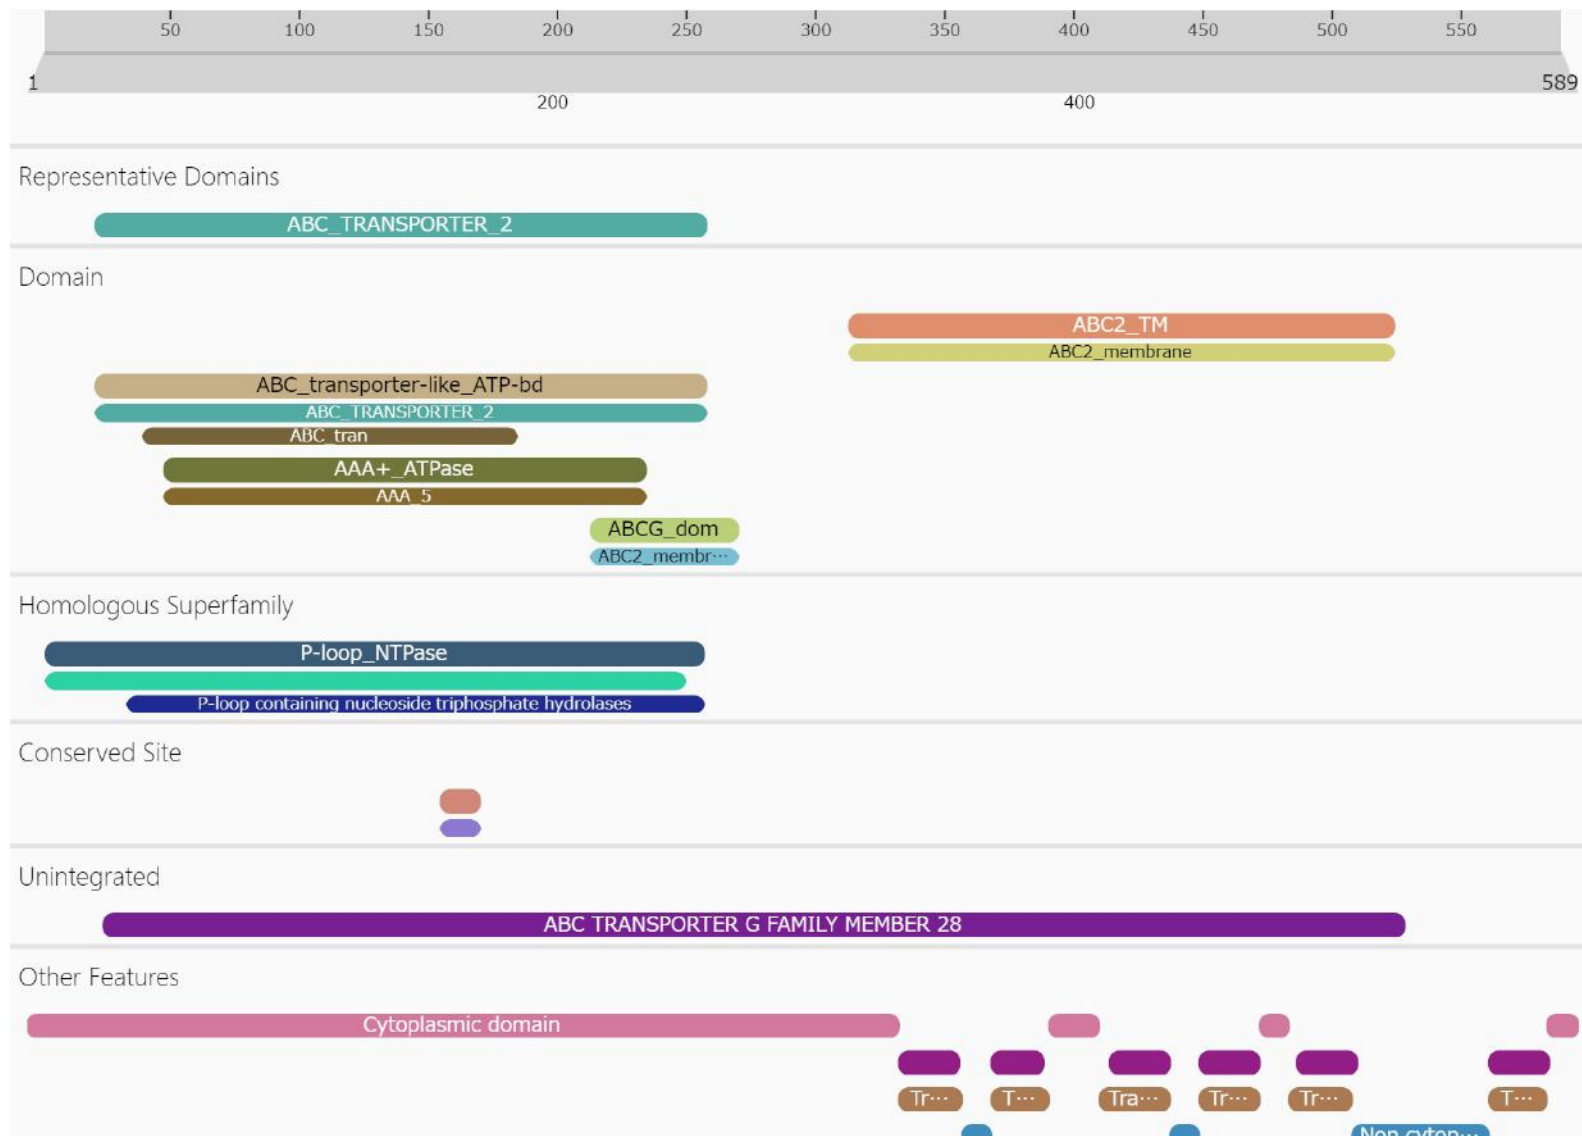

PS50893

**D** IPR013525  
PF01061

**D** IPR003439  
PS50893  
PF00005

**D** IPR003593  
SM00382

**D** IPR043926  
PF19055

**H** IPR027417  
G3DSA:3.40.50.300  
SSF52540

**S** IPR017871  
PS00211

PTHR48041

PHOBIUS: CYTOPLASMIC\_DOMAIN  
TMHMM: TMhelix  
PHOBIUS: TRANSMEMBRANE  
PHOBIUS: NON\_CYTOPLASMIC\_DOMAIN



# ABCG5

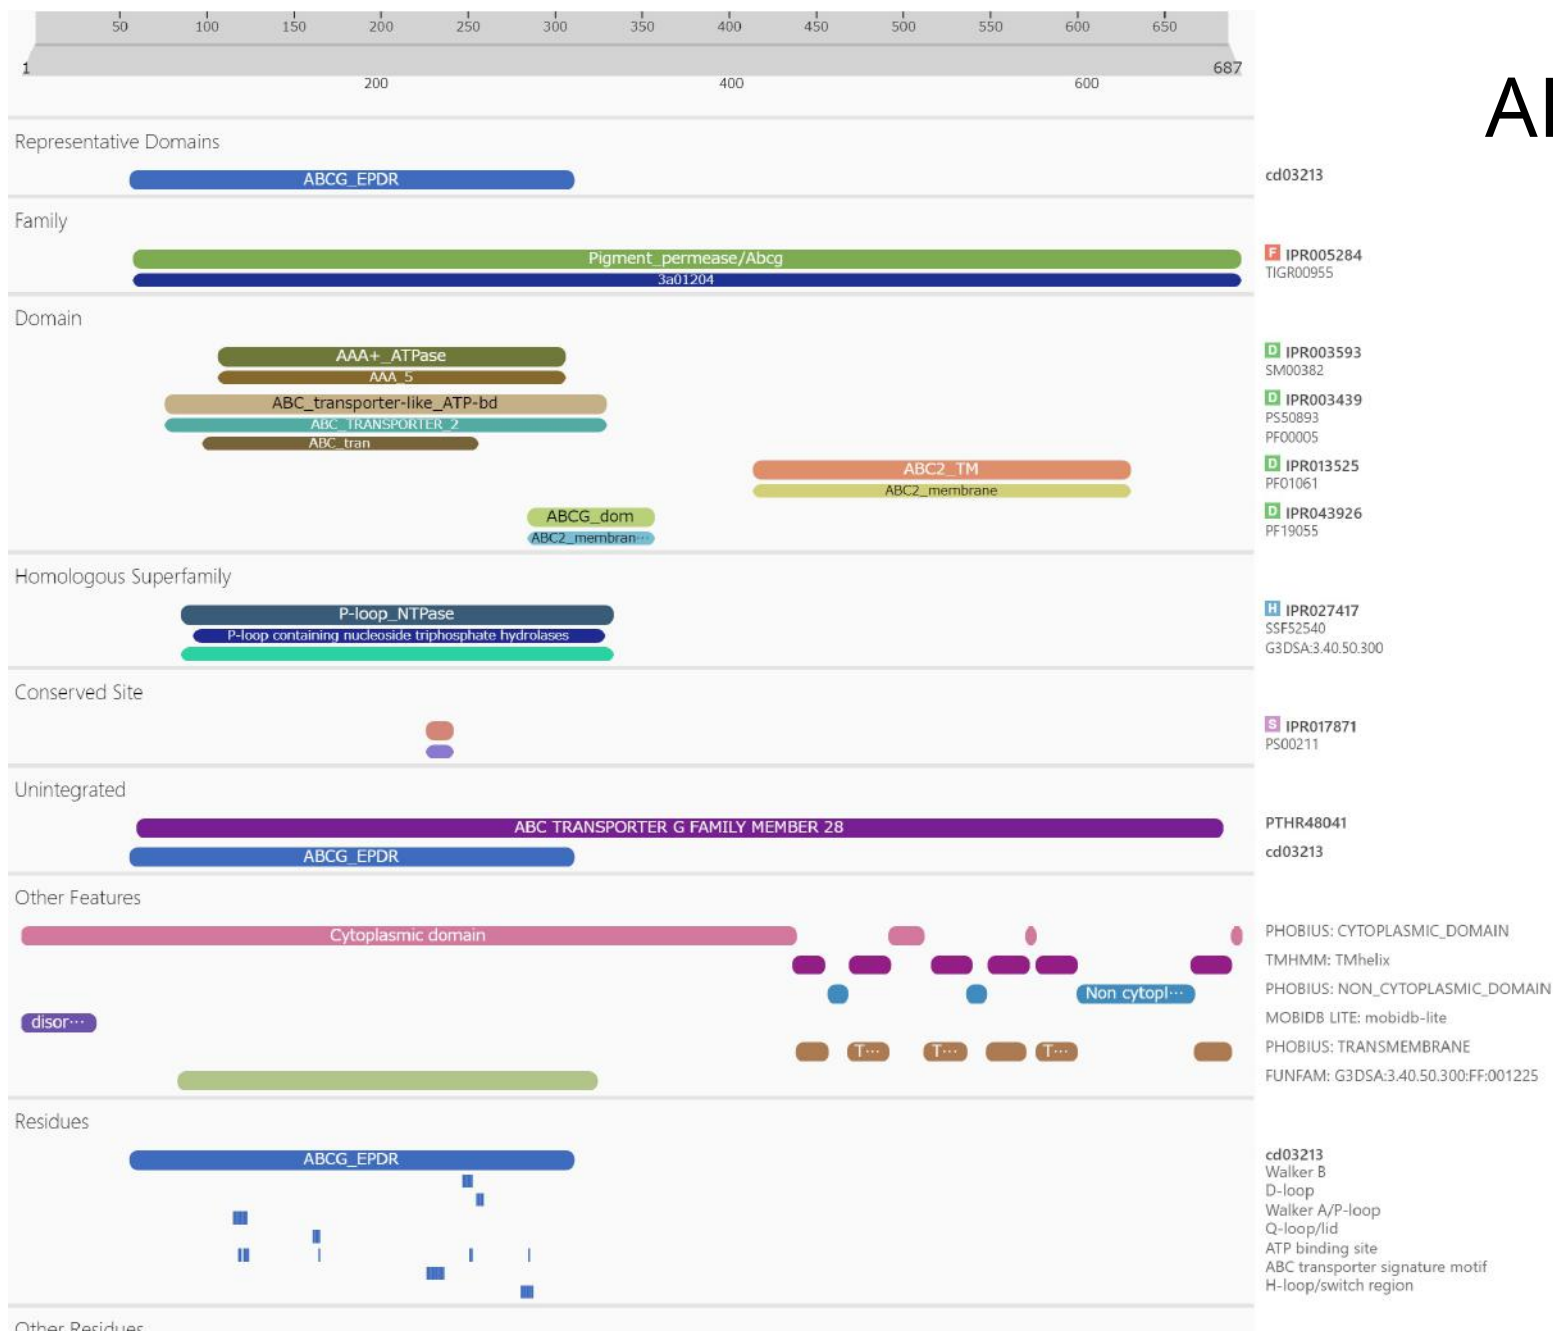

# ABCG6

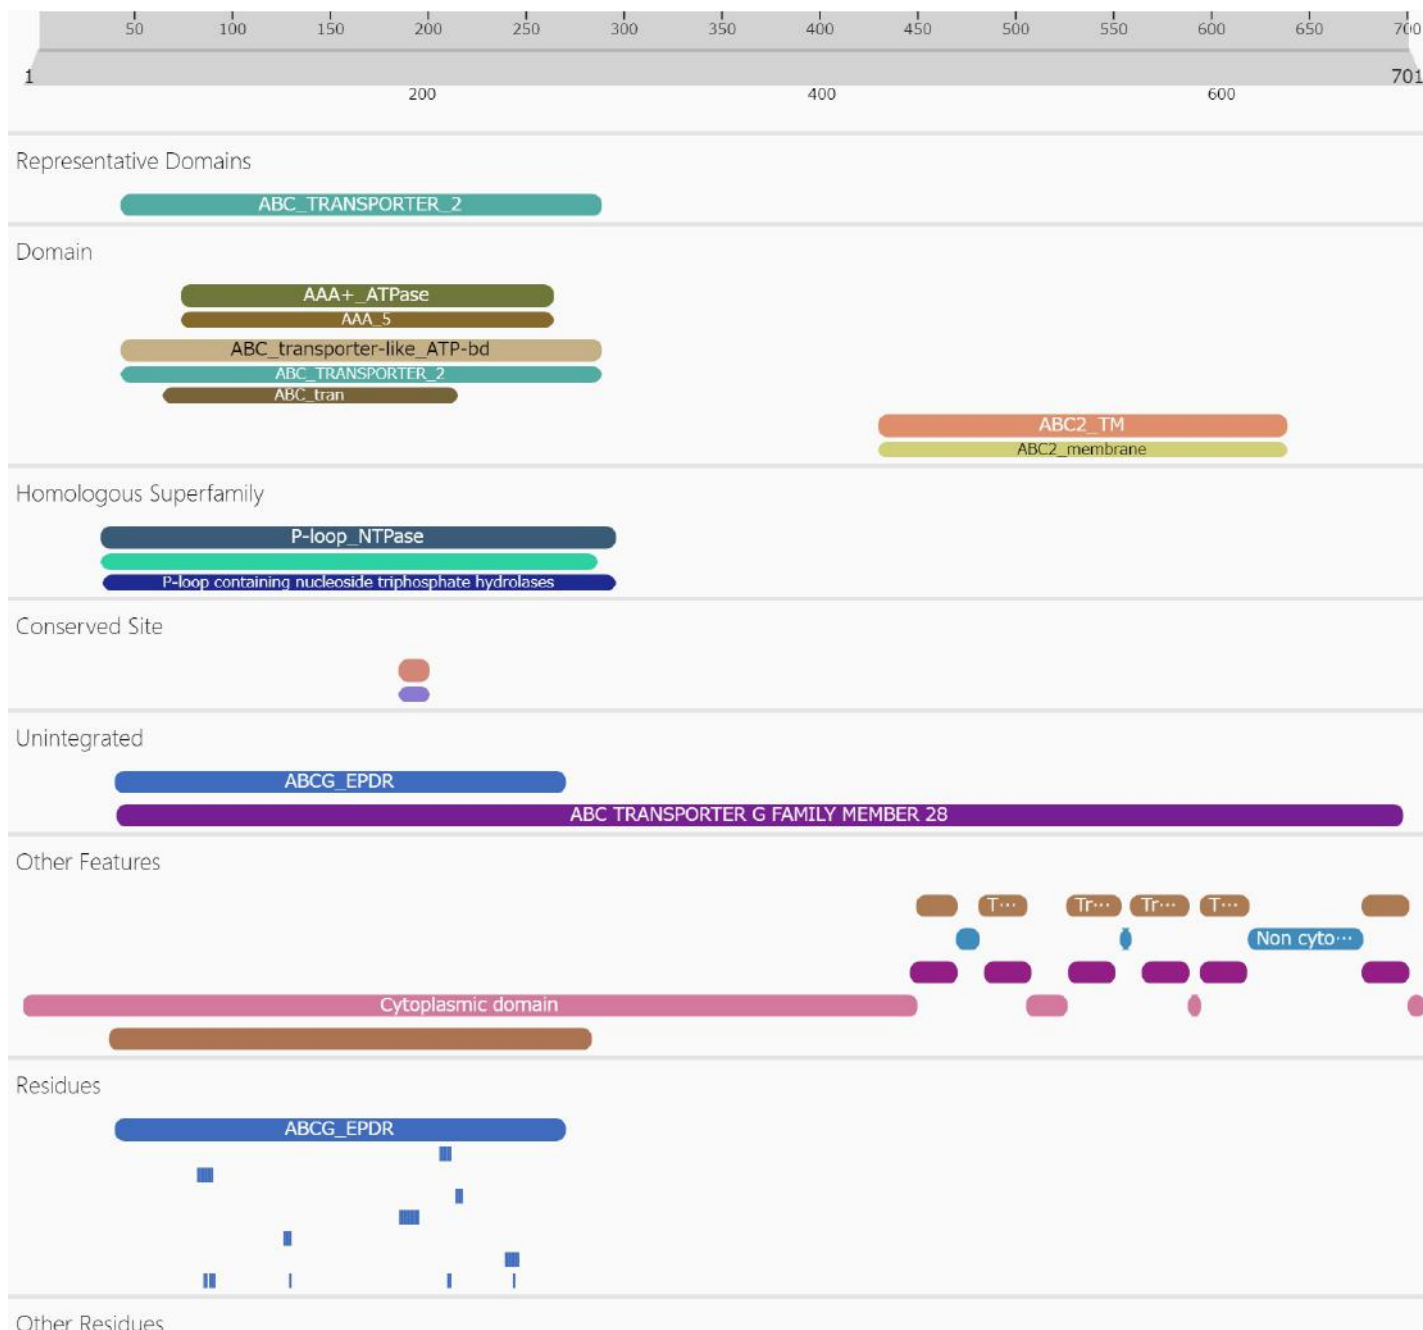

PS50893

**D** IPR003593  
SM00382

**D** IPR003439  
PS50893  
PF00005

**D** IPR013525  
PF01061

**H** IPR027417  
G3DSA:3.40.50.300  
SSF52540

**S** IPR017871  
PS00211

cd03213

PTHR48041

PHOBIUS: TRANSMEMBRANE  
PHOBIUS: NON\_CYTOPLASMIC\_DOMAIN  
TMHMM: TMhelix  
PHOBIUS: CYTOPLASMIC\_DOMAIN  
FUNFAM: G3DSA:3.40.50.300:FF:000891

cd03213  
Walker B  
Walker A/P-loop  
D-loop  
ABC transporter signature motif  
Q-loop/lid  
H-loop/switch region  
ATP binding site

# ABCG7

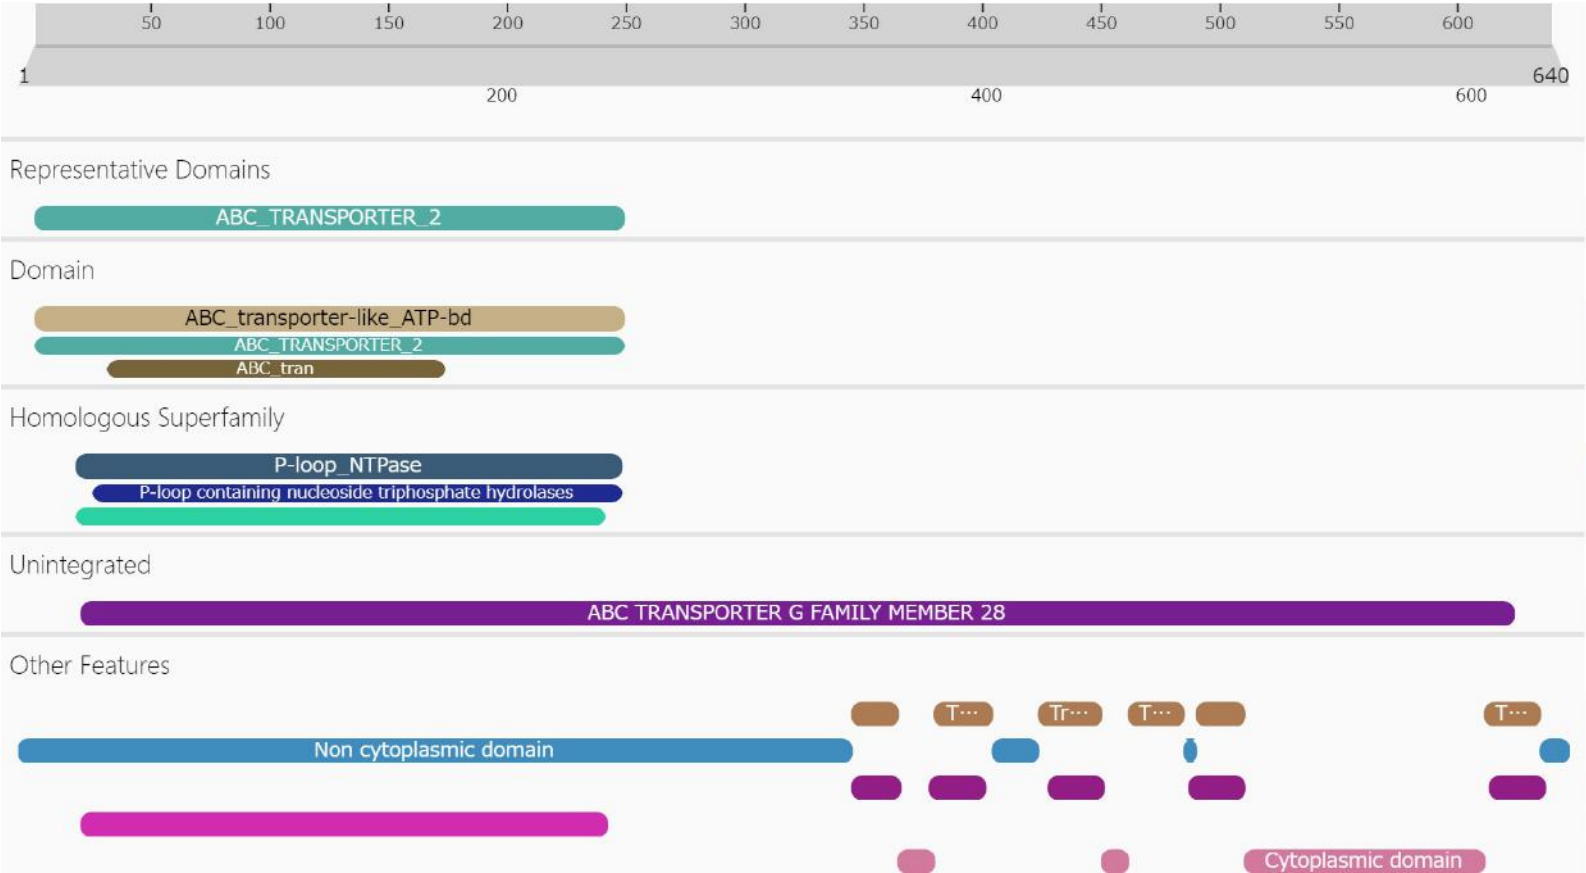

# ABCG8

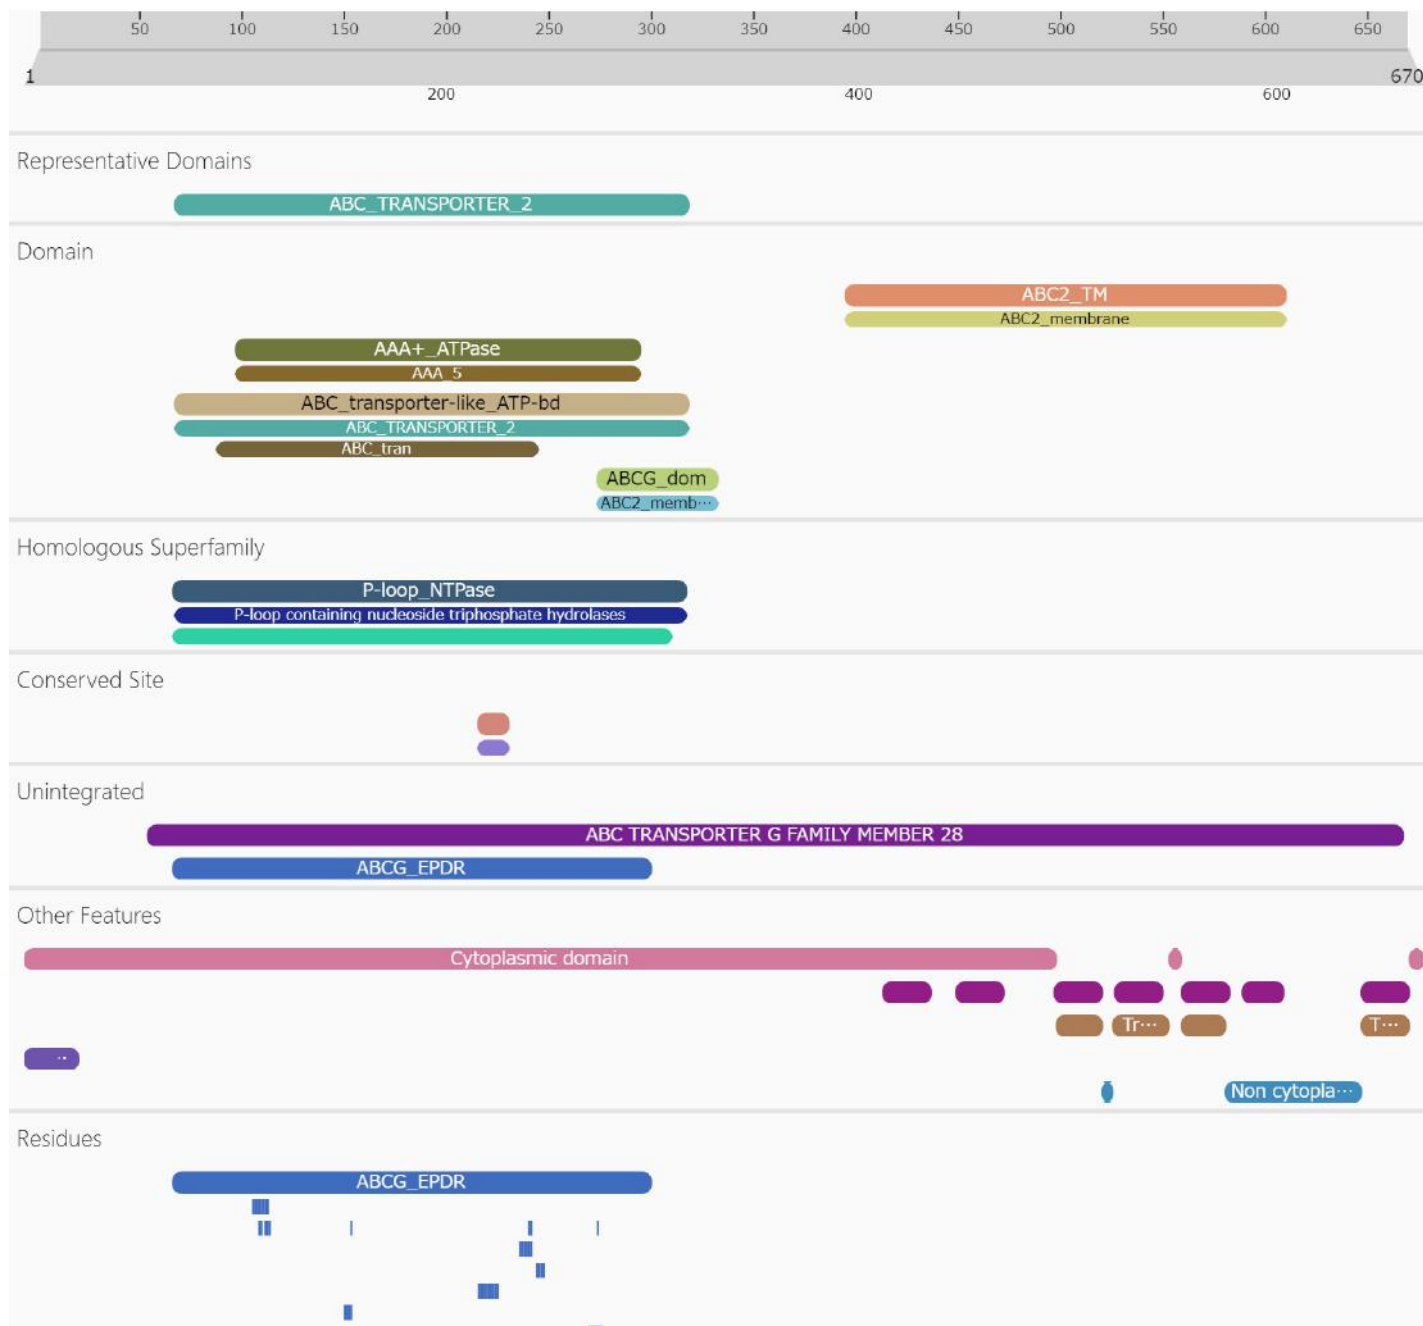

PS50893

**D** IPR013525  
PF01061

**D** IPR003593  
SM00382

**D** IPR003439  
PS50893  
PF00005

**D** IPR043926  
PF19055

**H** IPR027417  
SSF52540  
G3DSA:3.40.50.300

**S** IPR017871  
PS00211

PTHR48041  
cd03213

PHOBIUS: CYTOPLASMIC\_DOMAIN  
TMHMM: TMhelix  
PHOBIUS: TRANSMEMBRANE  
MOBIDB LITE: mobidb-lite  
PHOBIUS: NON\_CYTOPLASMIC\_DOMAIN

cd03213  
Walker A/P-loop  
ATP binding site  
Walker B  
D-loop  
ABC transporter signature motif  
Q-loop/lid  
H-loop/switch region

# ABCG9

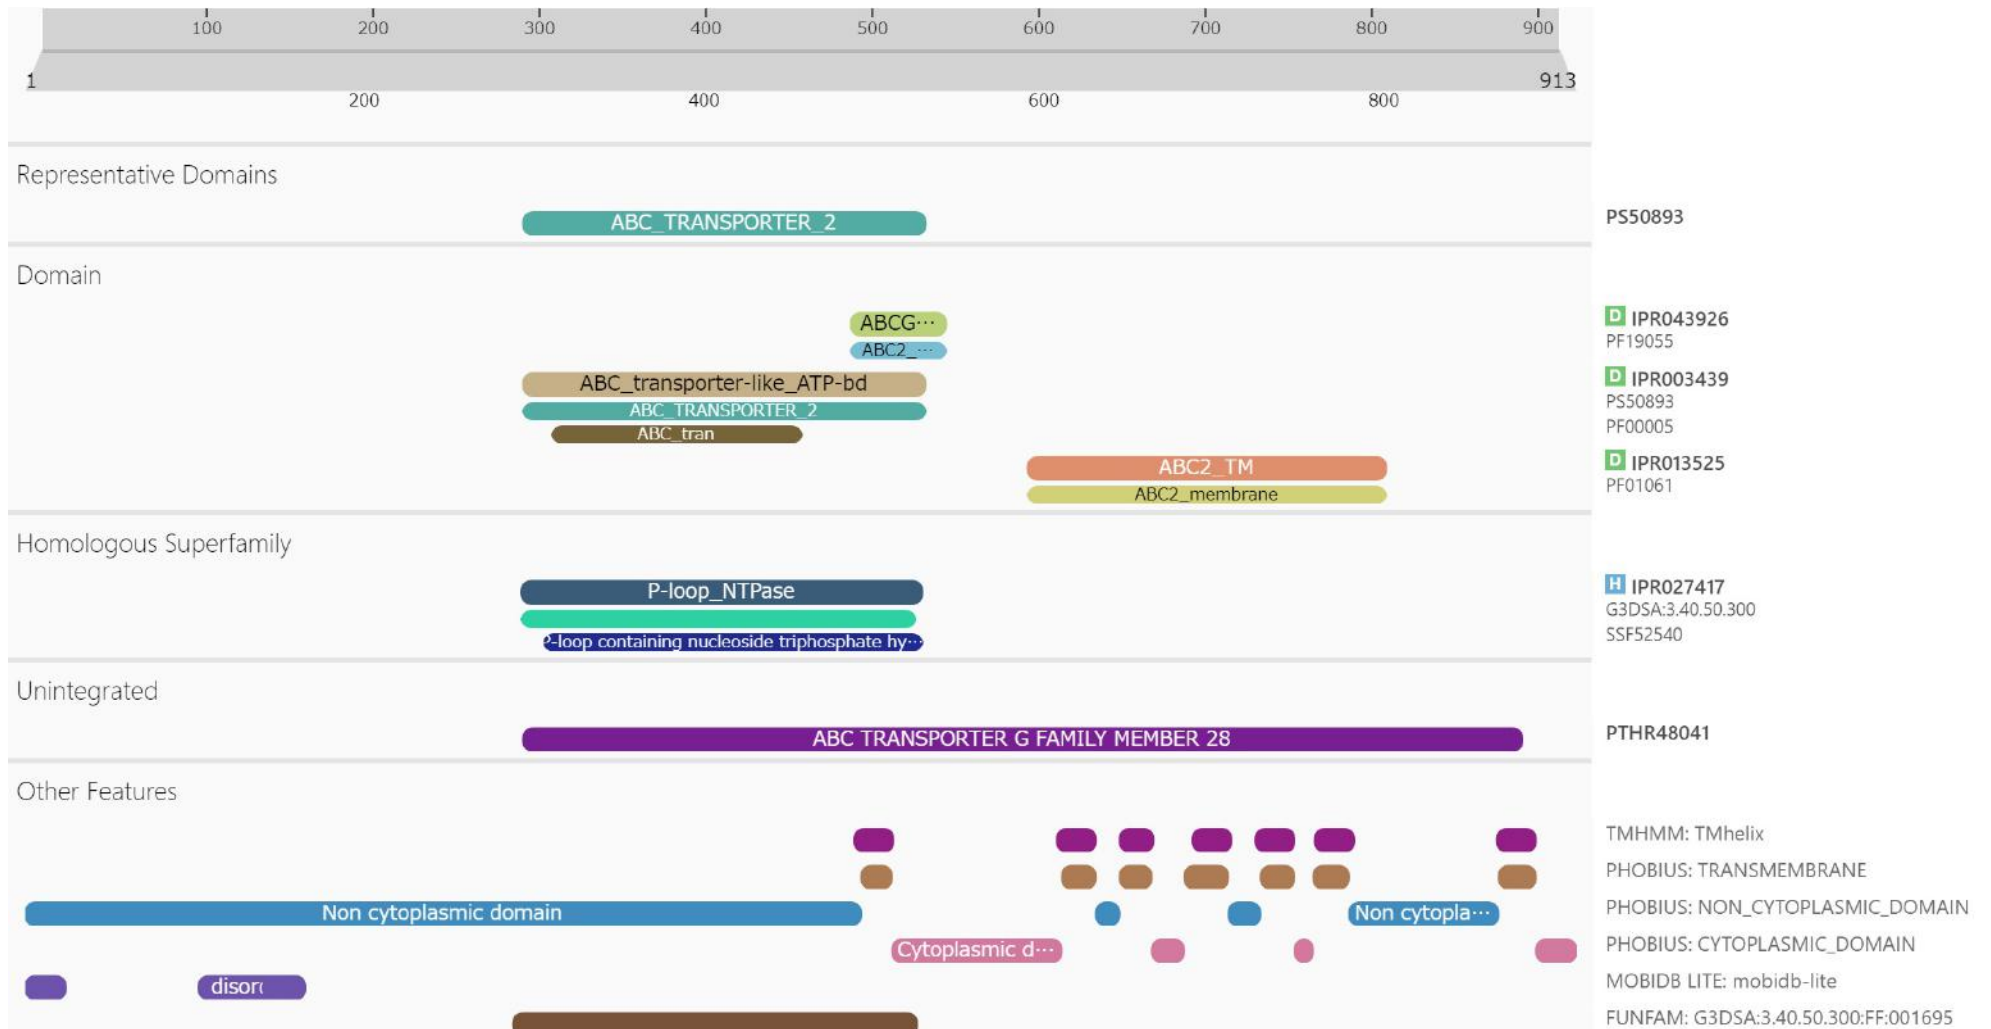

# ABCG10

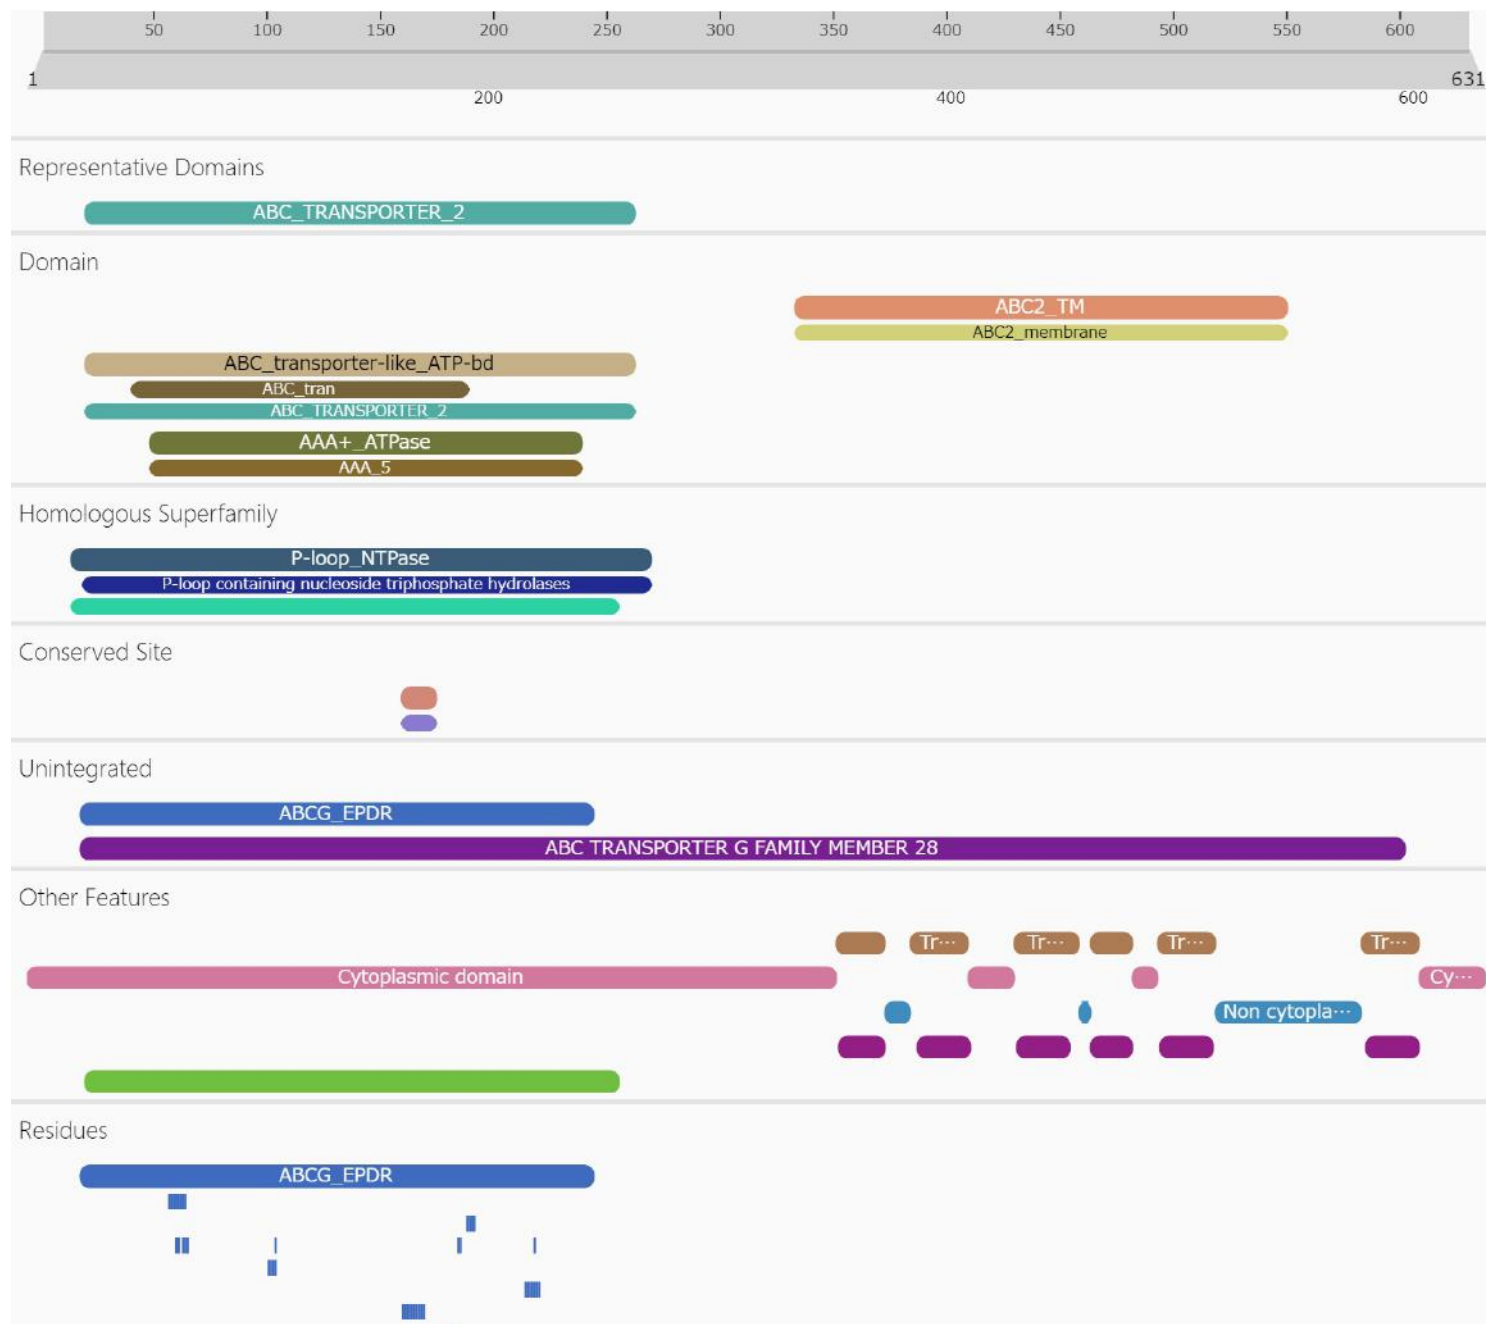

PS50893

**D** IPR013525  
PF01061

**D** IPR003439  
PF00005  
PS50893

**D** IPR003593  
SM00382

**H** IPR027417  
SSF52540  
G3DSA:3.40.50.300

**S** IPR017871  
PS00211

cd03213

PTHR48041

PHOBIUS: TRANSMEMBRANE

PHOBIUS: CYTOPLASMIC\_DOMAIN

PHOBIUS: NON\_CYTOPLASMIC\_DOMAIN

TMHMM: TMhelix

FUNFAM: G3DSA:3.40.50.300:FF:001077

cd03213

Walker A/P-loop

D-loop

ATP binding site

Q-loop/lid

H-loop/switch region

ABC transporter signature motif

Walker B



# ABCG11

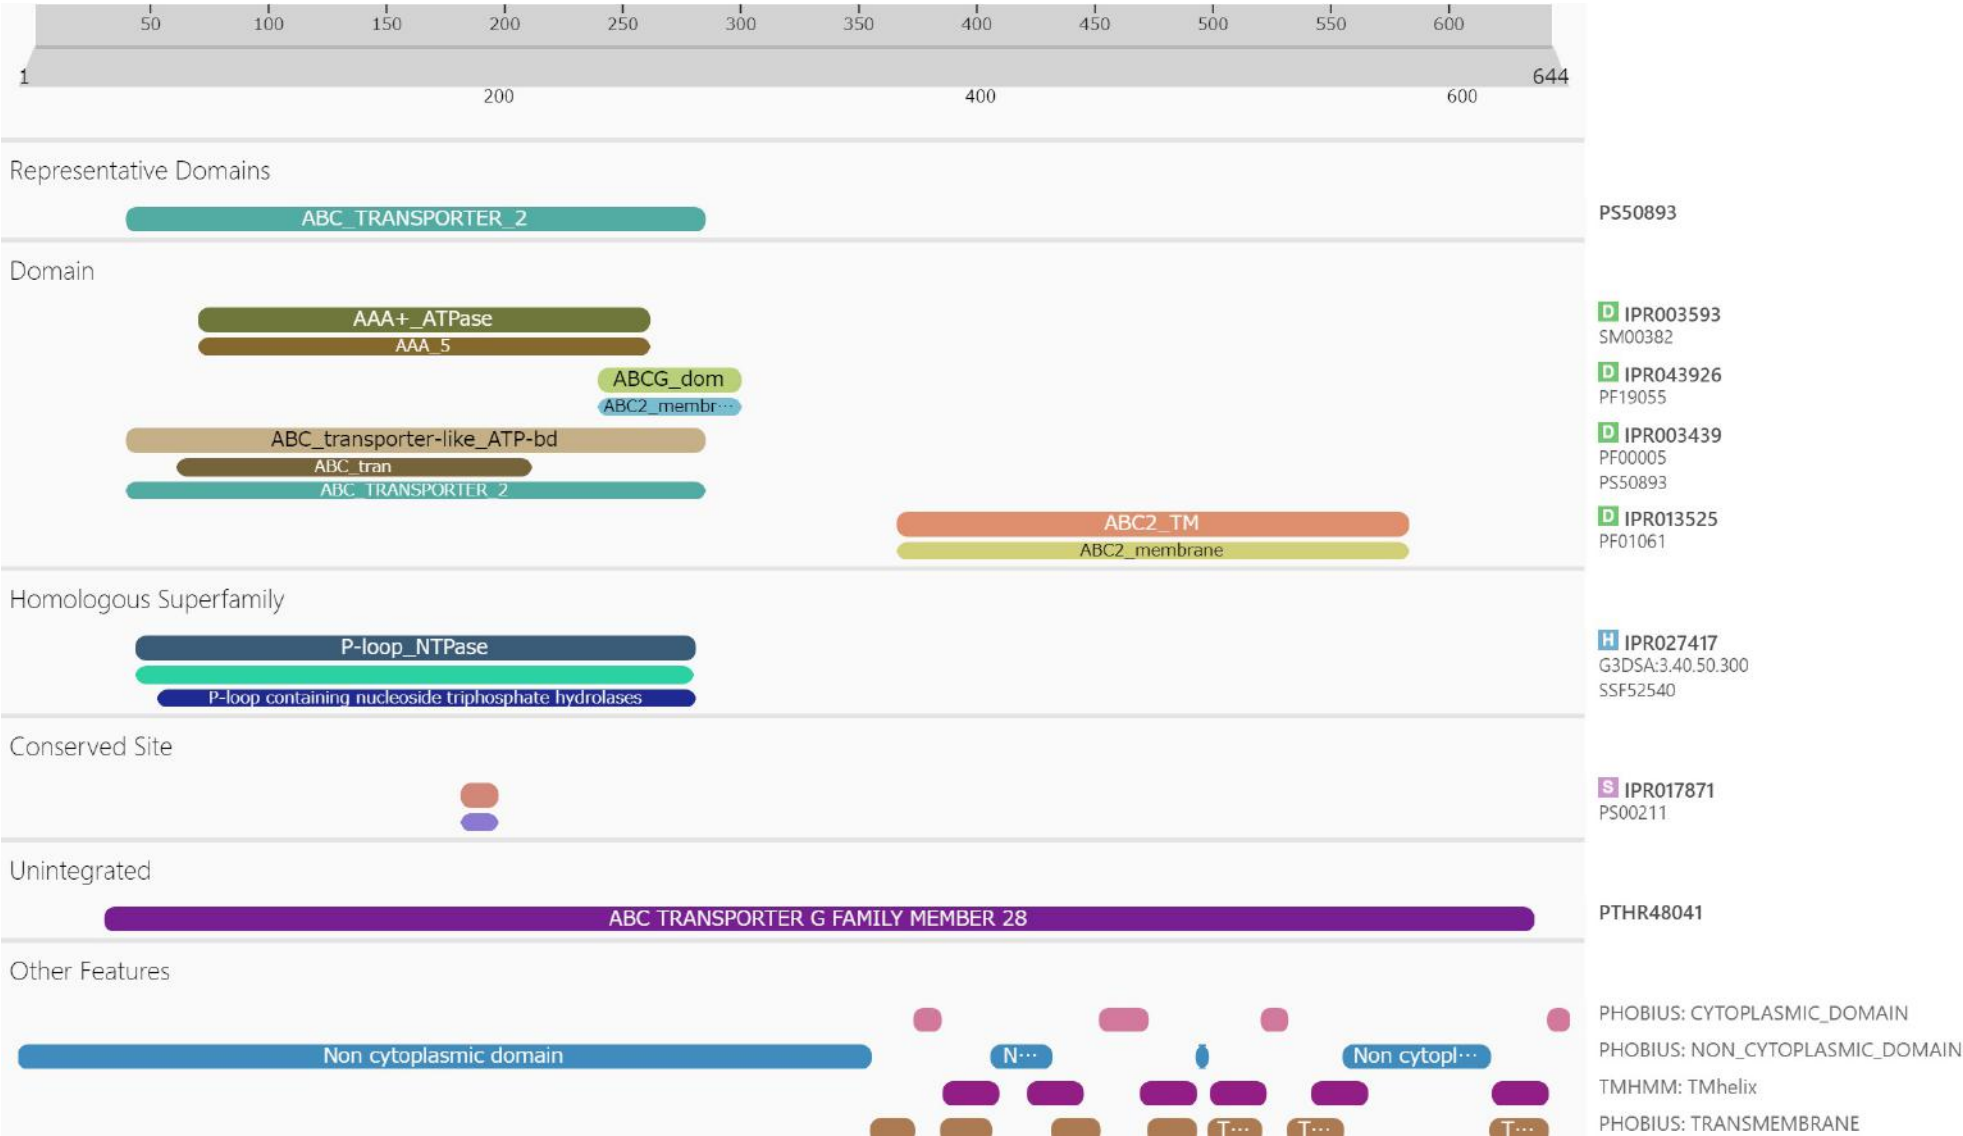

# ABCG12

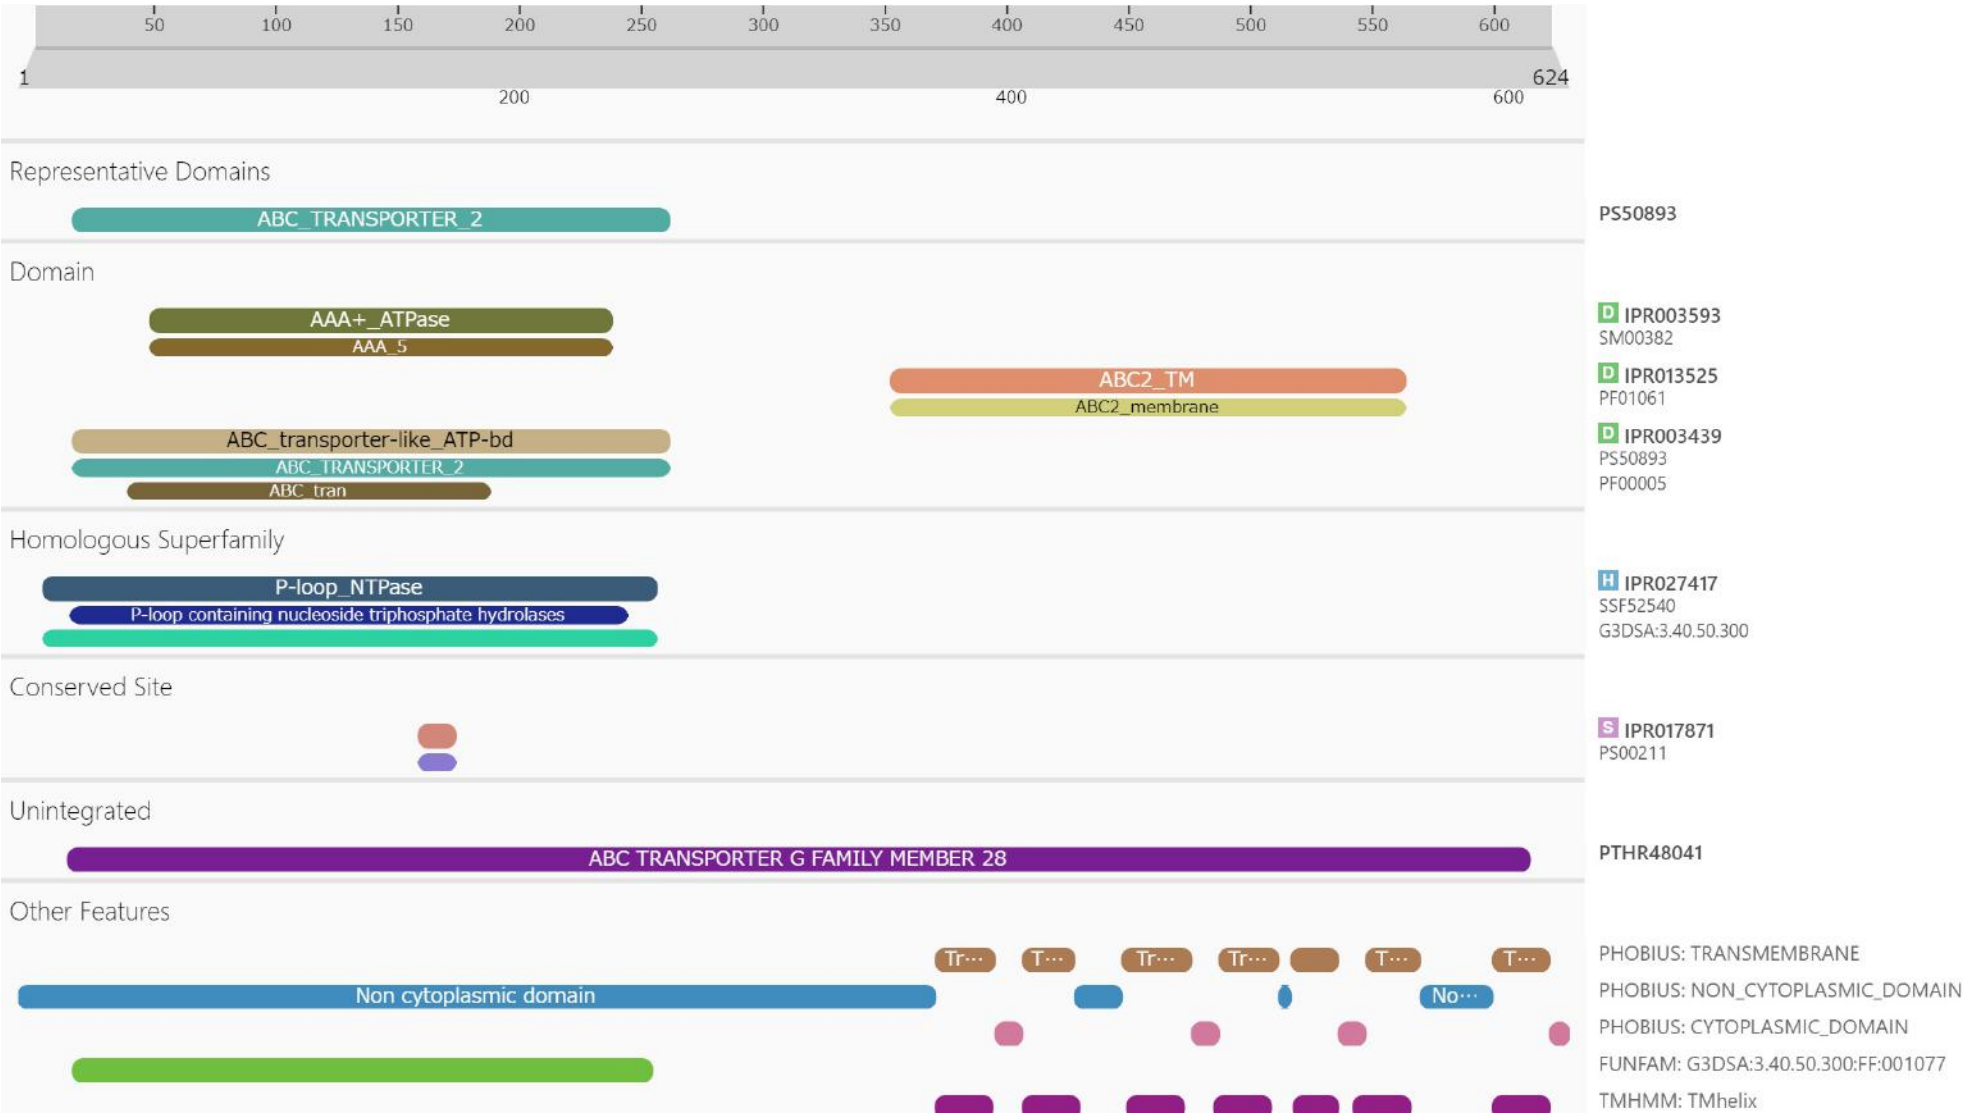

# ABCG4-like1

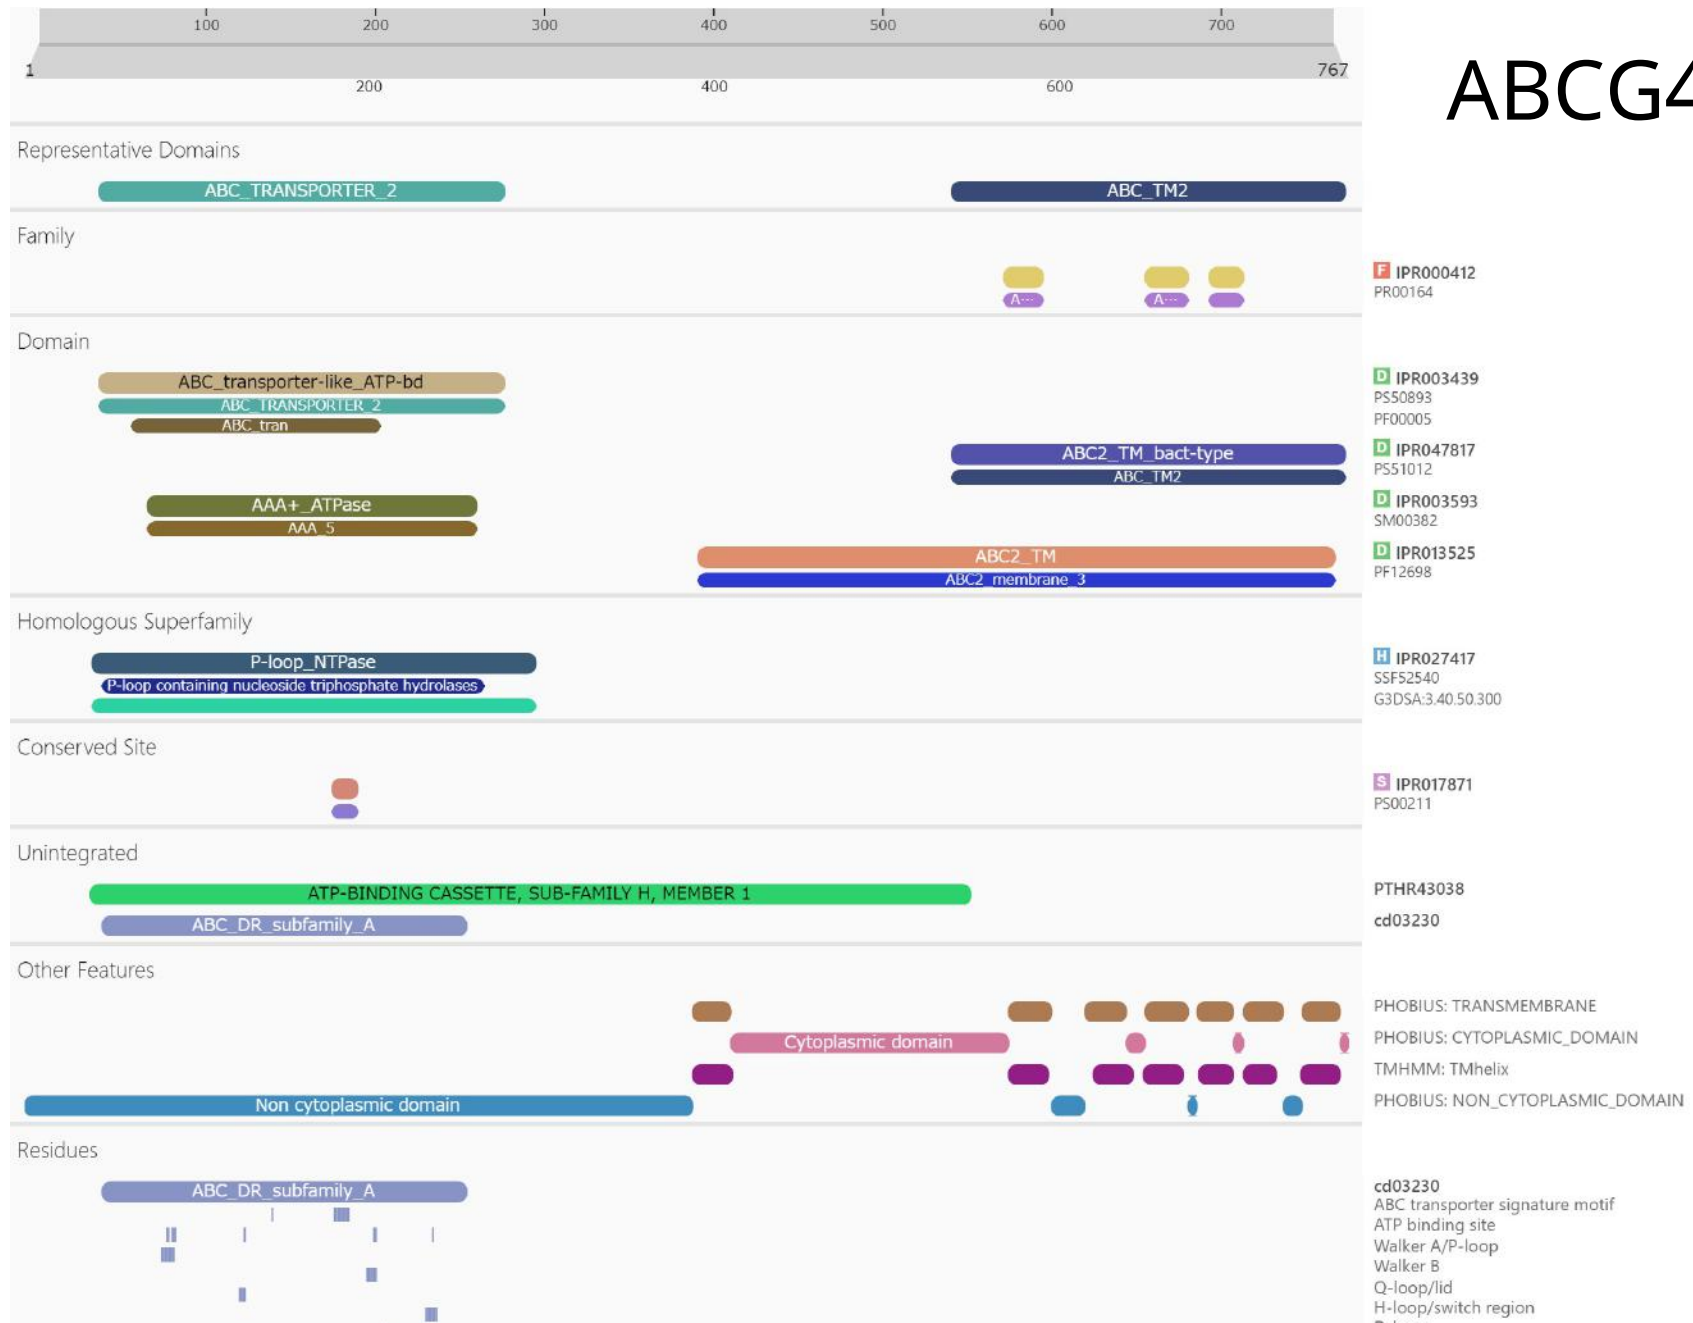

# ABCG23

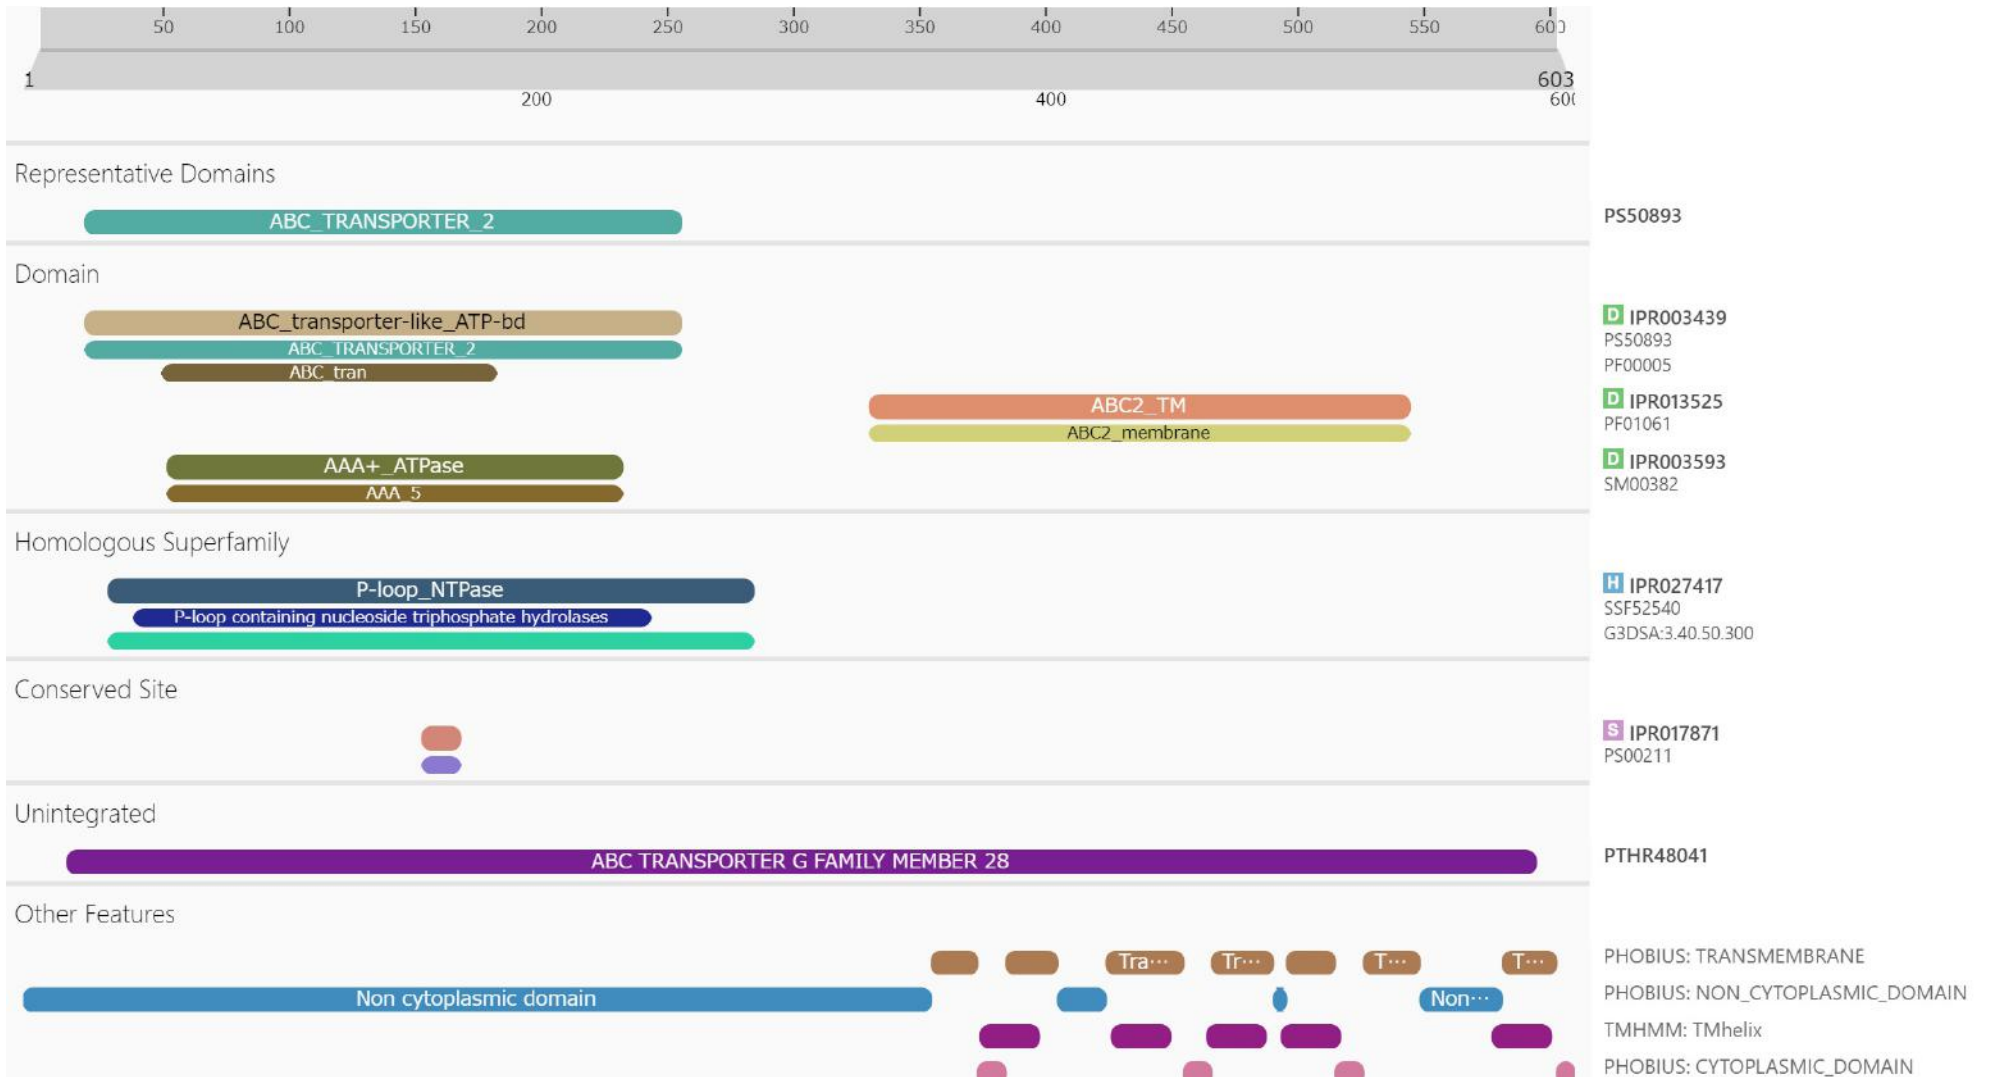

# ABCG4-like2

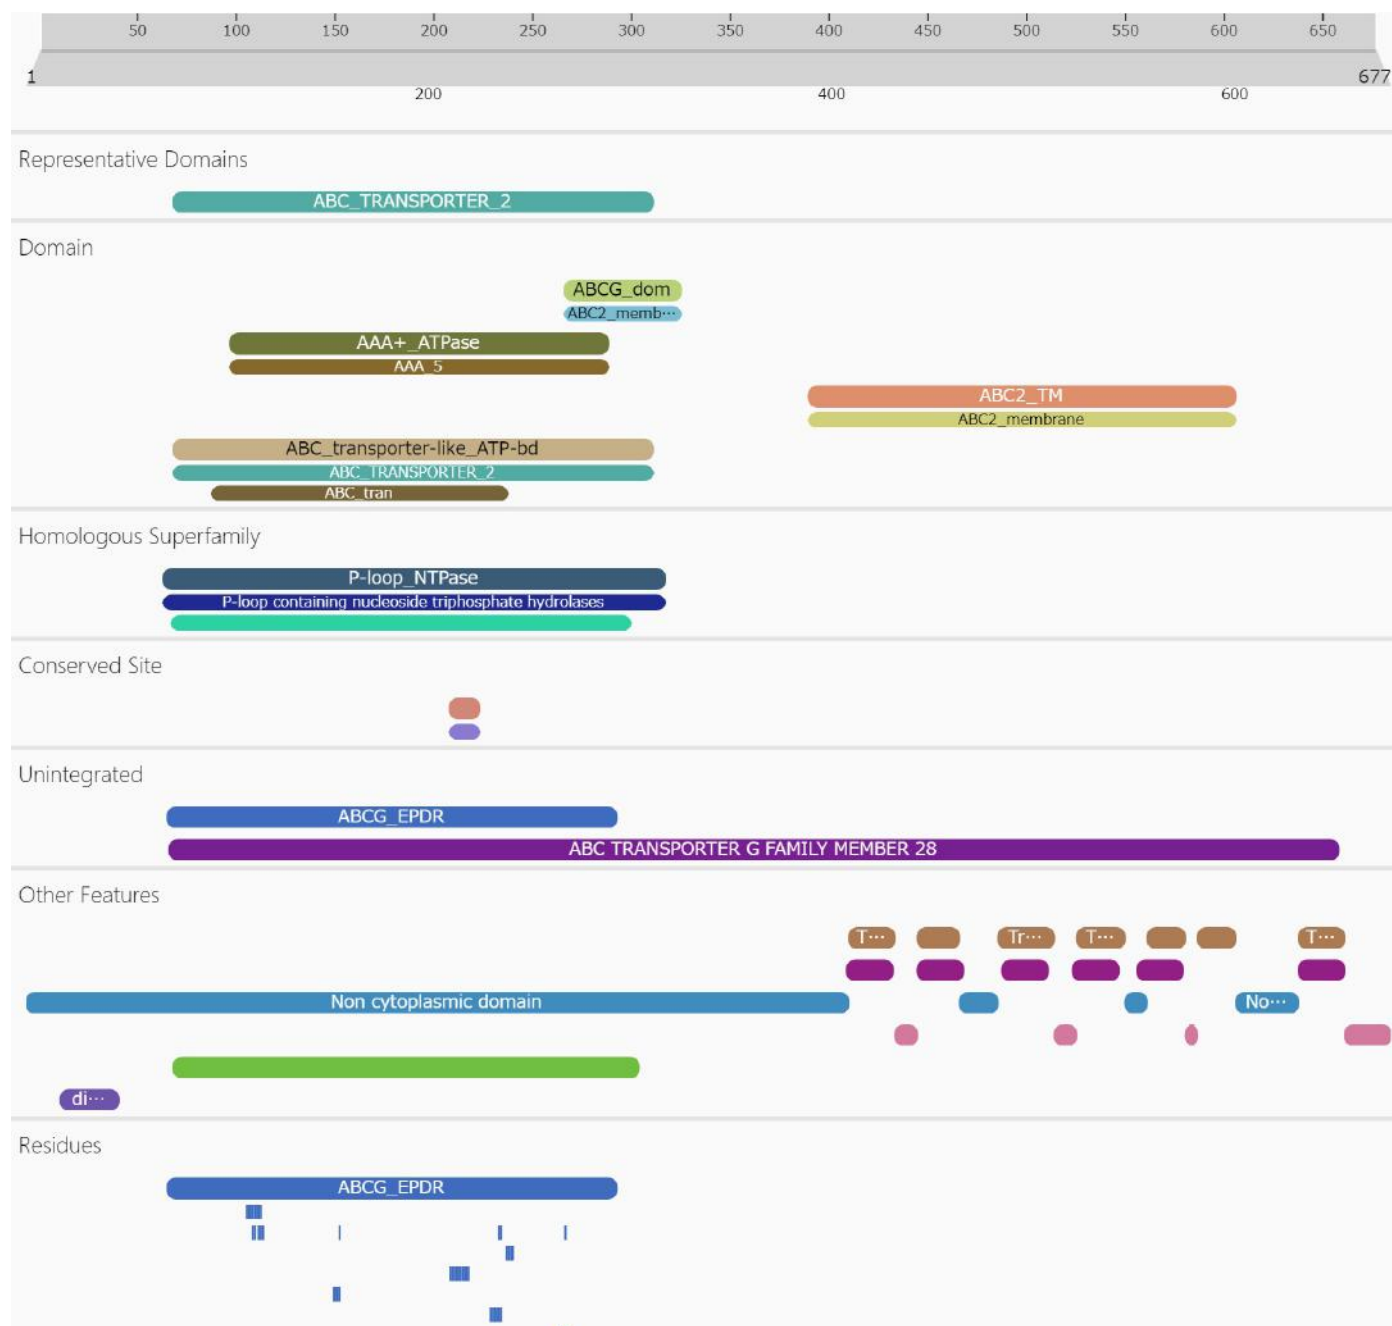

PS50893

IPR043926  
PF19055

IPR003593  
SM00382

IPR013525  
PF01061

IPR003439  
PS50893  
PF00005

IPR027417  
SSF52540  
G3DSA:3.40.50.300

IPR017871  
PS00211

cd03213

PTHR48041

PHOBIUS: TRANSMEMBRANE

TMHMM: TMhelix

PHOBIUS: NON\_CYTOPLASMIC\_DOMAIN

PHOBIUS: CYTOPLASMIC\_DOMAIN

FUNFAM: G3DSA:3.40.50.300:FF:001077

MOBIDB LITE: mobidb-lite

cd03213

Walker A/P-loop

ATP binding site

D-loop

ABC transporter signature motif

Q-loop/lid

Walker B

H-loop/switch region

# ABCG1-like1

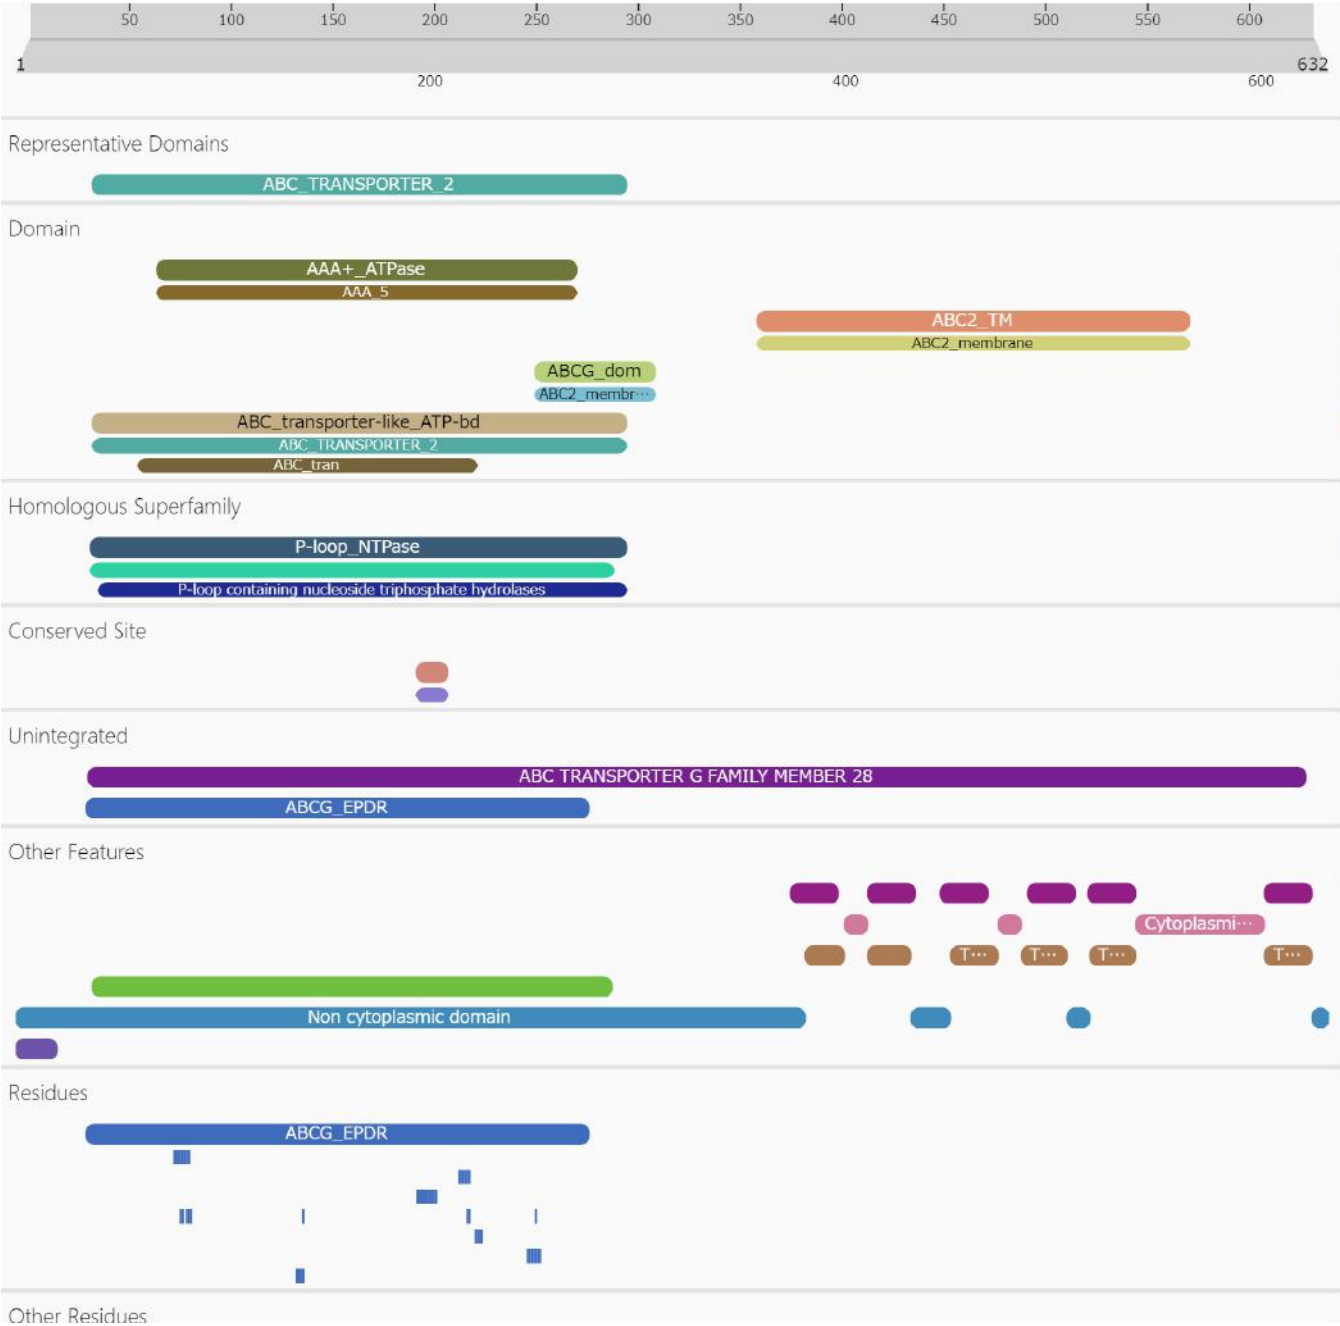

PS50893

D IPR003593  
SM00382

D IPR013525  
PF01061

D IPR043926  
PF19055

D IPR003439  
PS50893  
PF00005

H IPR027417  
G3DSA:3.40.50.300  
SSF52540

S IPR017871  
PS00211

PTHR48041  
cd03213

TMHMM: TMhelix  
PHOBIUS: CYTOPLASMIC\_DOMAIN  
PHOBIUS: TRANSMEMBRANE  
FUNFAM: G3DSA:3.40.50.300:FF:001077  
PHOBIUS: NON\_CYTOPLASMIC\_DOMAIN  
MOBIDB LITE: mobidb-lite

cd03213  
Walker A/P-loop  
Walker B  
ABC transporter signature motif  
ATP binding site  
D-loop  
H-loop/switch region  
Q-loop/lid



# ABCG4-like3

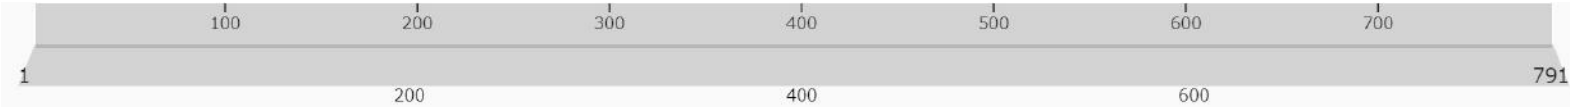

## Representative Domains

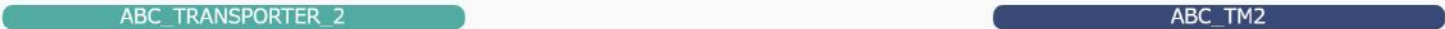

## Domain

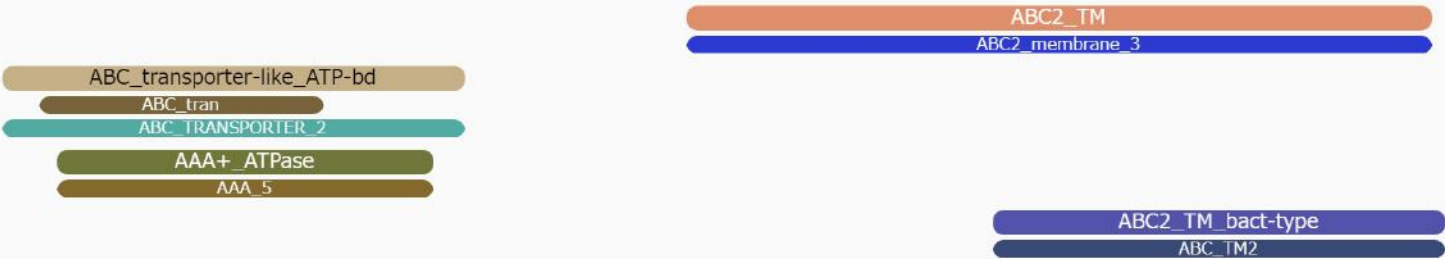

**D** IPR013525  
PF12698

**D** IPR003439  
PF00005  
PS50893

**D** IPR003593  
SM00382

**D** IPR047817  
PS51012

## Homologous Superfamily

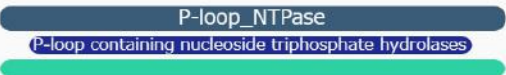

**H** IPR027417  
SSF52540  
G3DSA:3.40.50.300

## Unintegrated

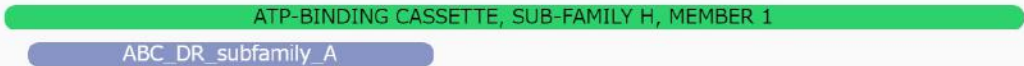

PTHR43038  
cd03230

## Other Features

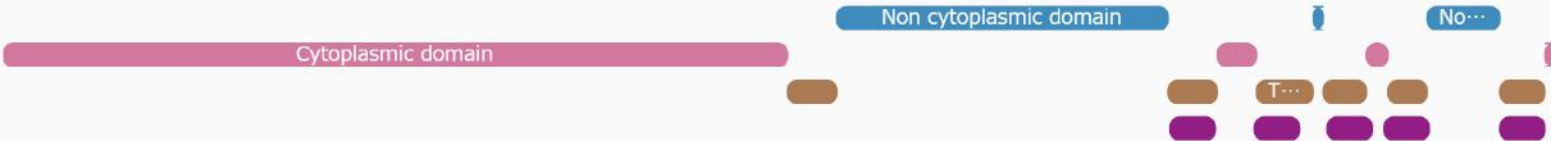

PHOBIUS: NON\_CYTOPLASMIC\_DOMAIN  
PHOBIUS: CYTOPLASMIC\_DOMAIN  
PHOBIUS: TRANSMEMBRANE  
TMHMM: TMhelix

## Residues

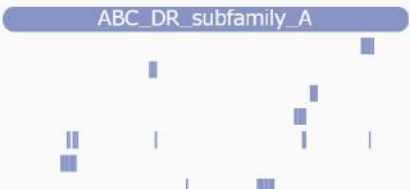

cd03230  
H-loop/switch region  
Q-loop/lid  
D-loop  
Walker B  
ATP binding site  
Walker A/P-loop  
ABC transporter signature motif

# ABCH1

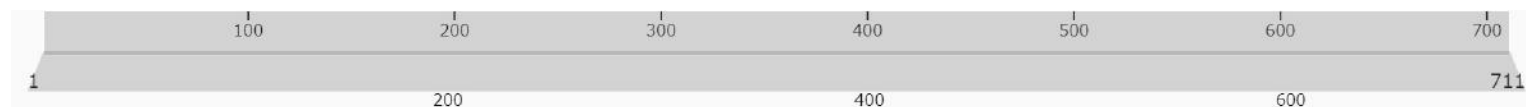

## Representative Domains

ABC\_TRANSPORTER\_2

PS50893

## Domain

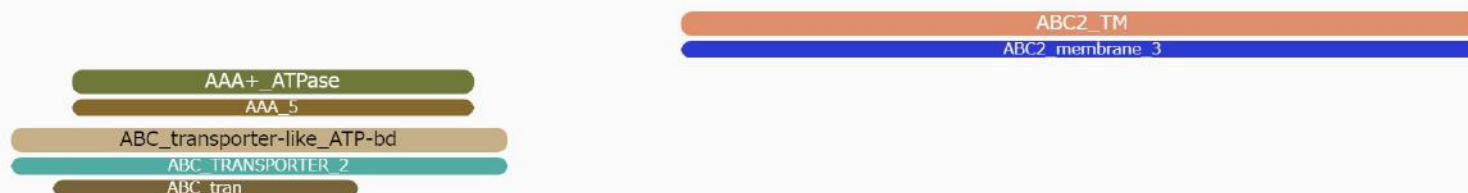

**D** IPR013525  
PF12698

**D** IPR003593  
SM00382

**D** IPR003439  
PS50893  
PF00005

## Homologous Superfamily

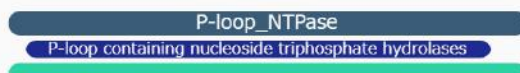

**H** IPR027417  
SSF52540  
G3DSA:3.40.50.300

## Conserved Site

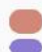

**S** IPR017871  
PS00211

## Unintegrated

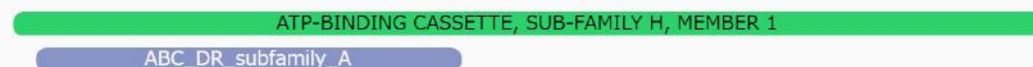

PTHR43038  
cd03230

## Other Features

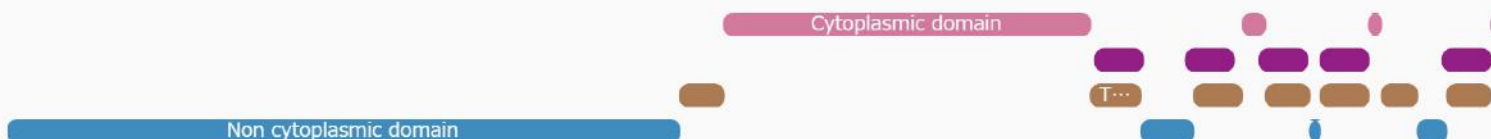

PHOBIUS: CYTOPLASMIC\_DOMAIN  
TMHMM: TMhelix  
PHOBIUS: TRANSMEMBRANE  
PHOBIUS: NON\_CYTOPLASMIC\_DOMAIN

## Residues

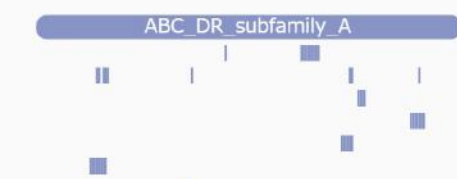

cd03230  
ABC transporter signature motif  
ATP binding site  
D-loop  
H-loop/switch region  
Walker B  
Walker A/P-loop  
O-loop/lid

# ABCH2

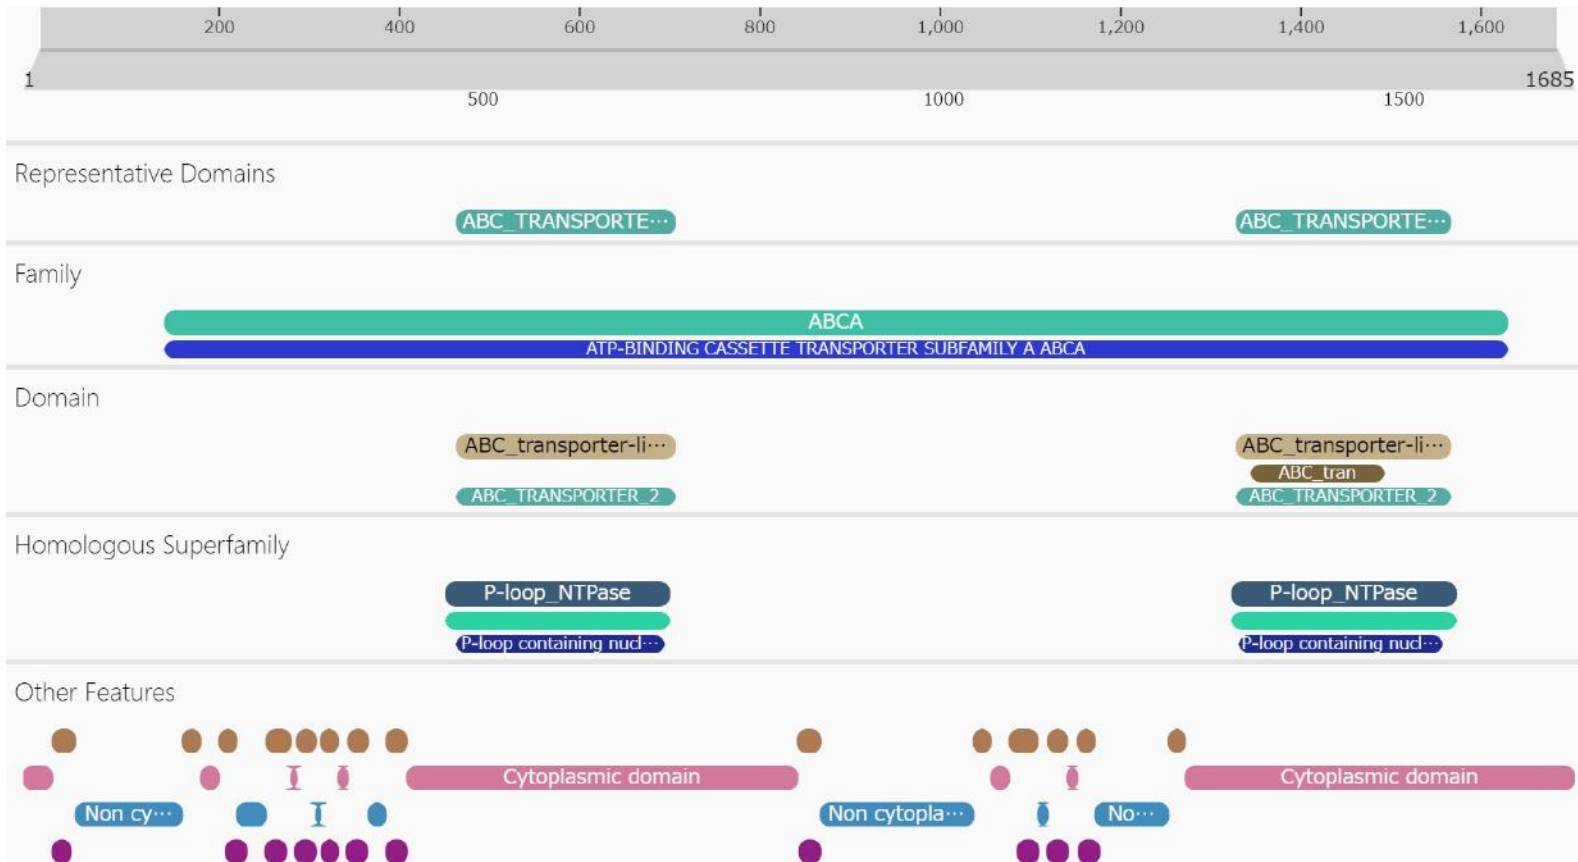

Supplement: s1 [file s1]
