# Supplementary material for: Cry Toxins Use Multiple ATP-Binding Cassette Transporter Subfamily C Members as Low-Efficiency Receptors in Bombyx mori
Source: MDPI journal article supplement (doi:10.3390/biom14030271), 2024-02-23
Supplement: s1 [file s1]

**A**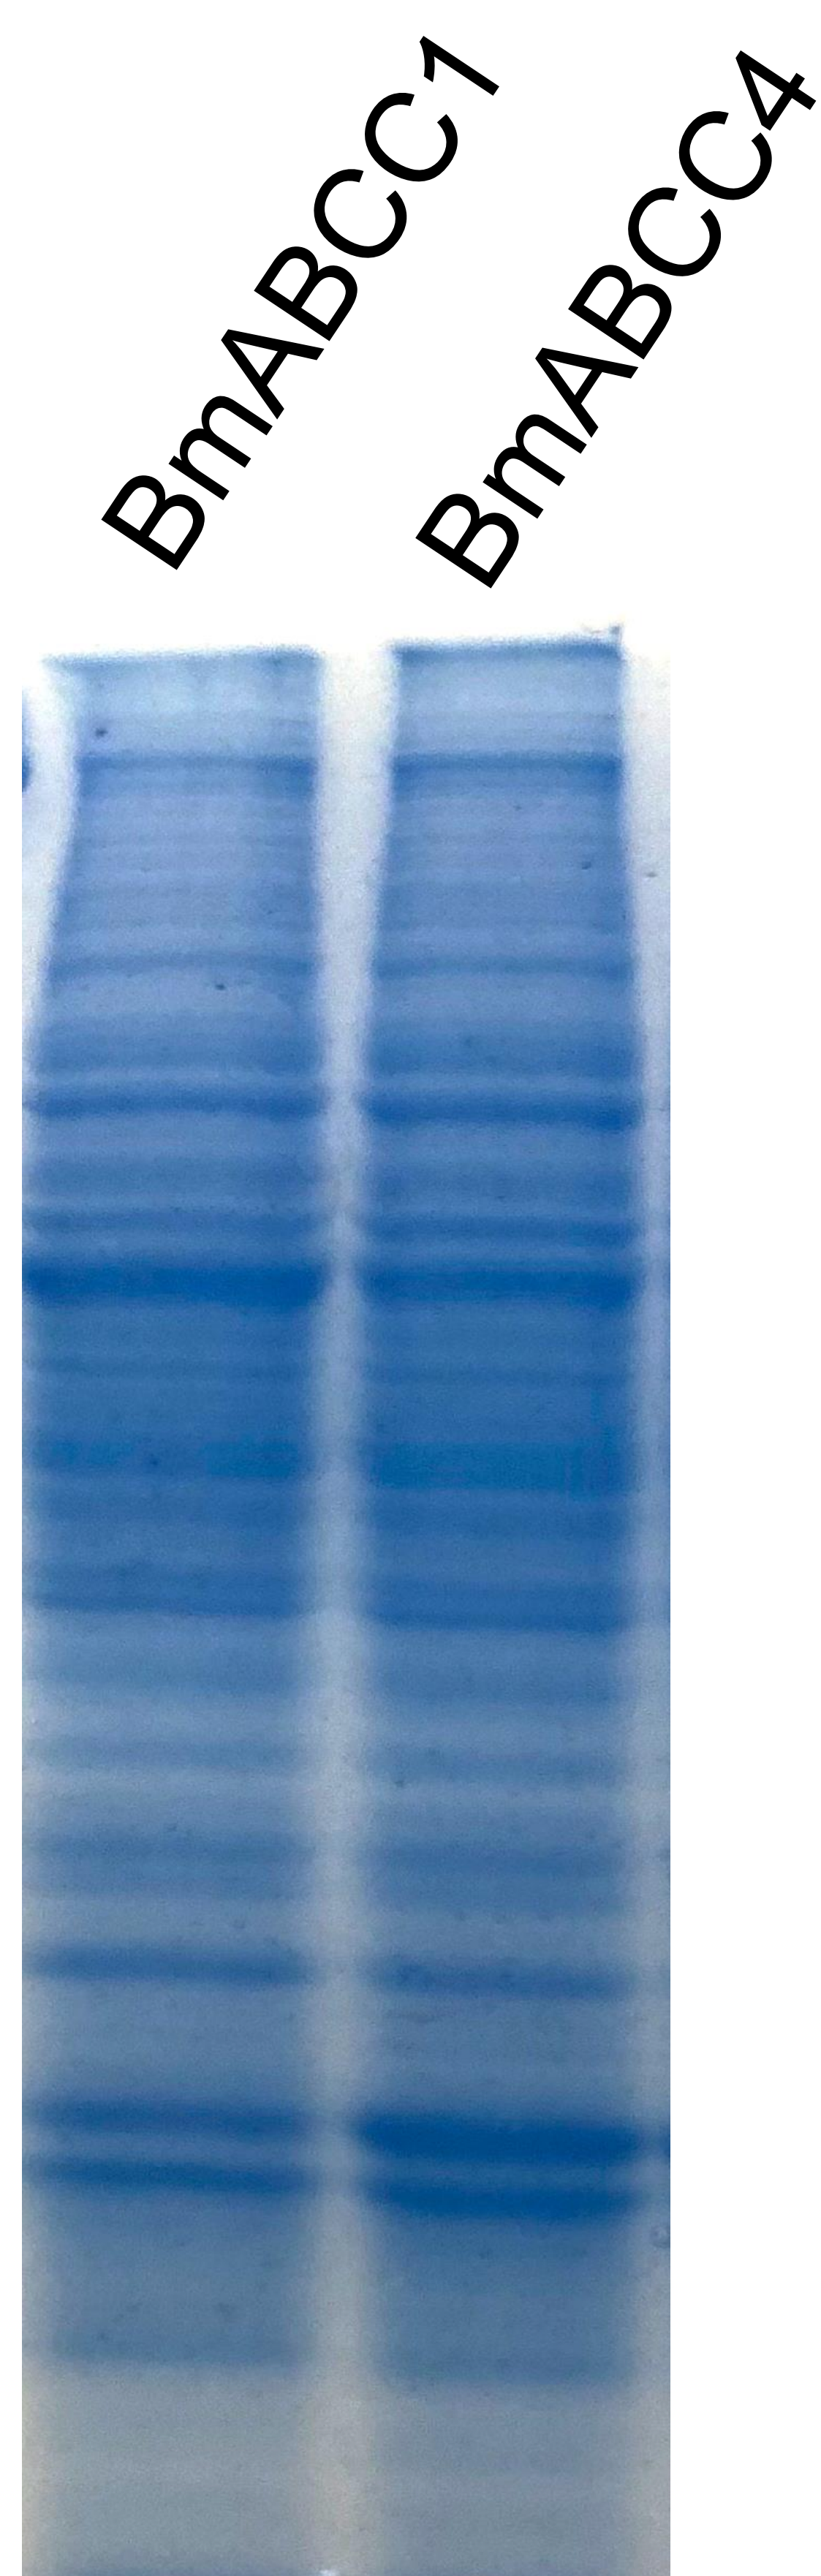

CBB

**B**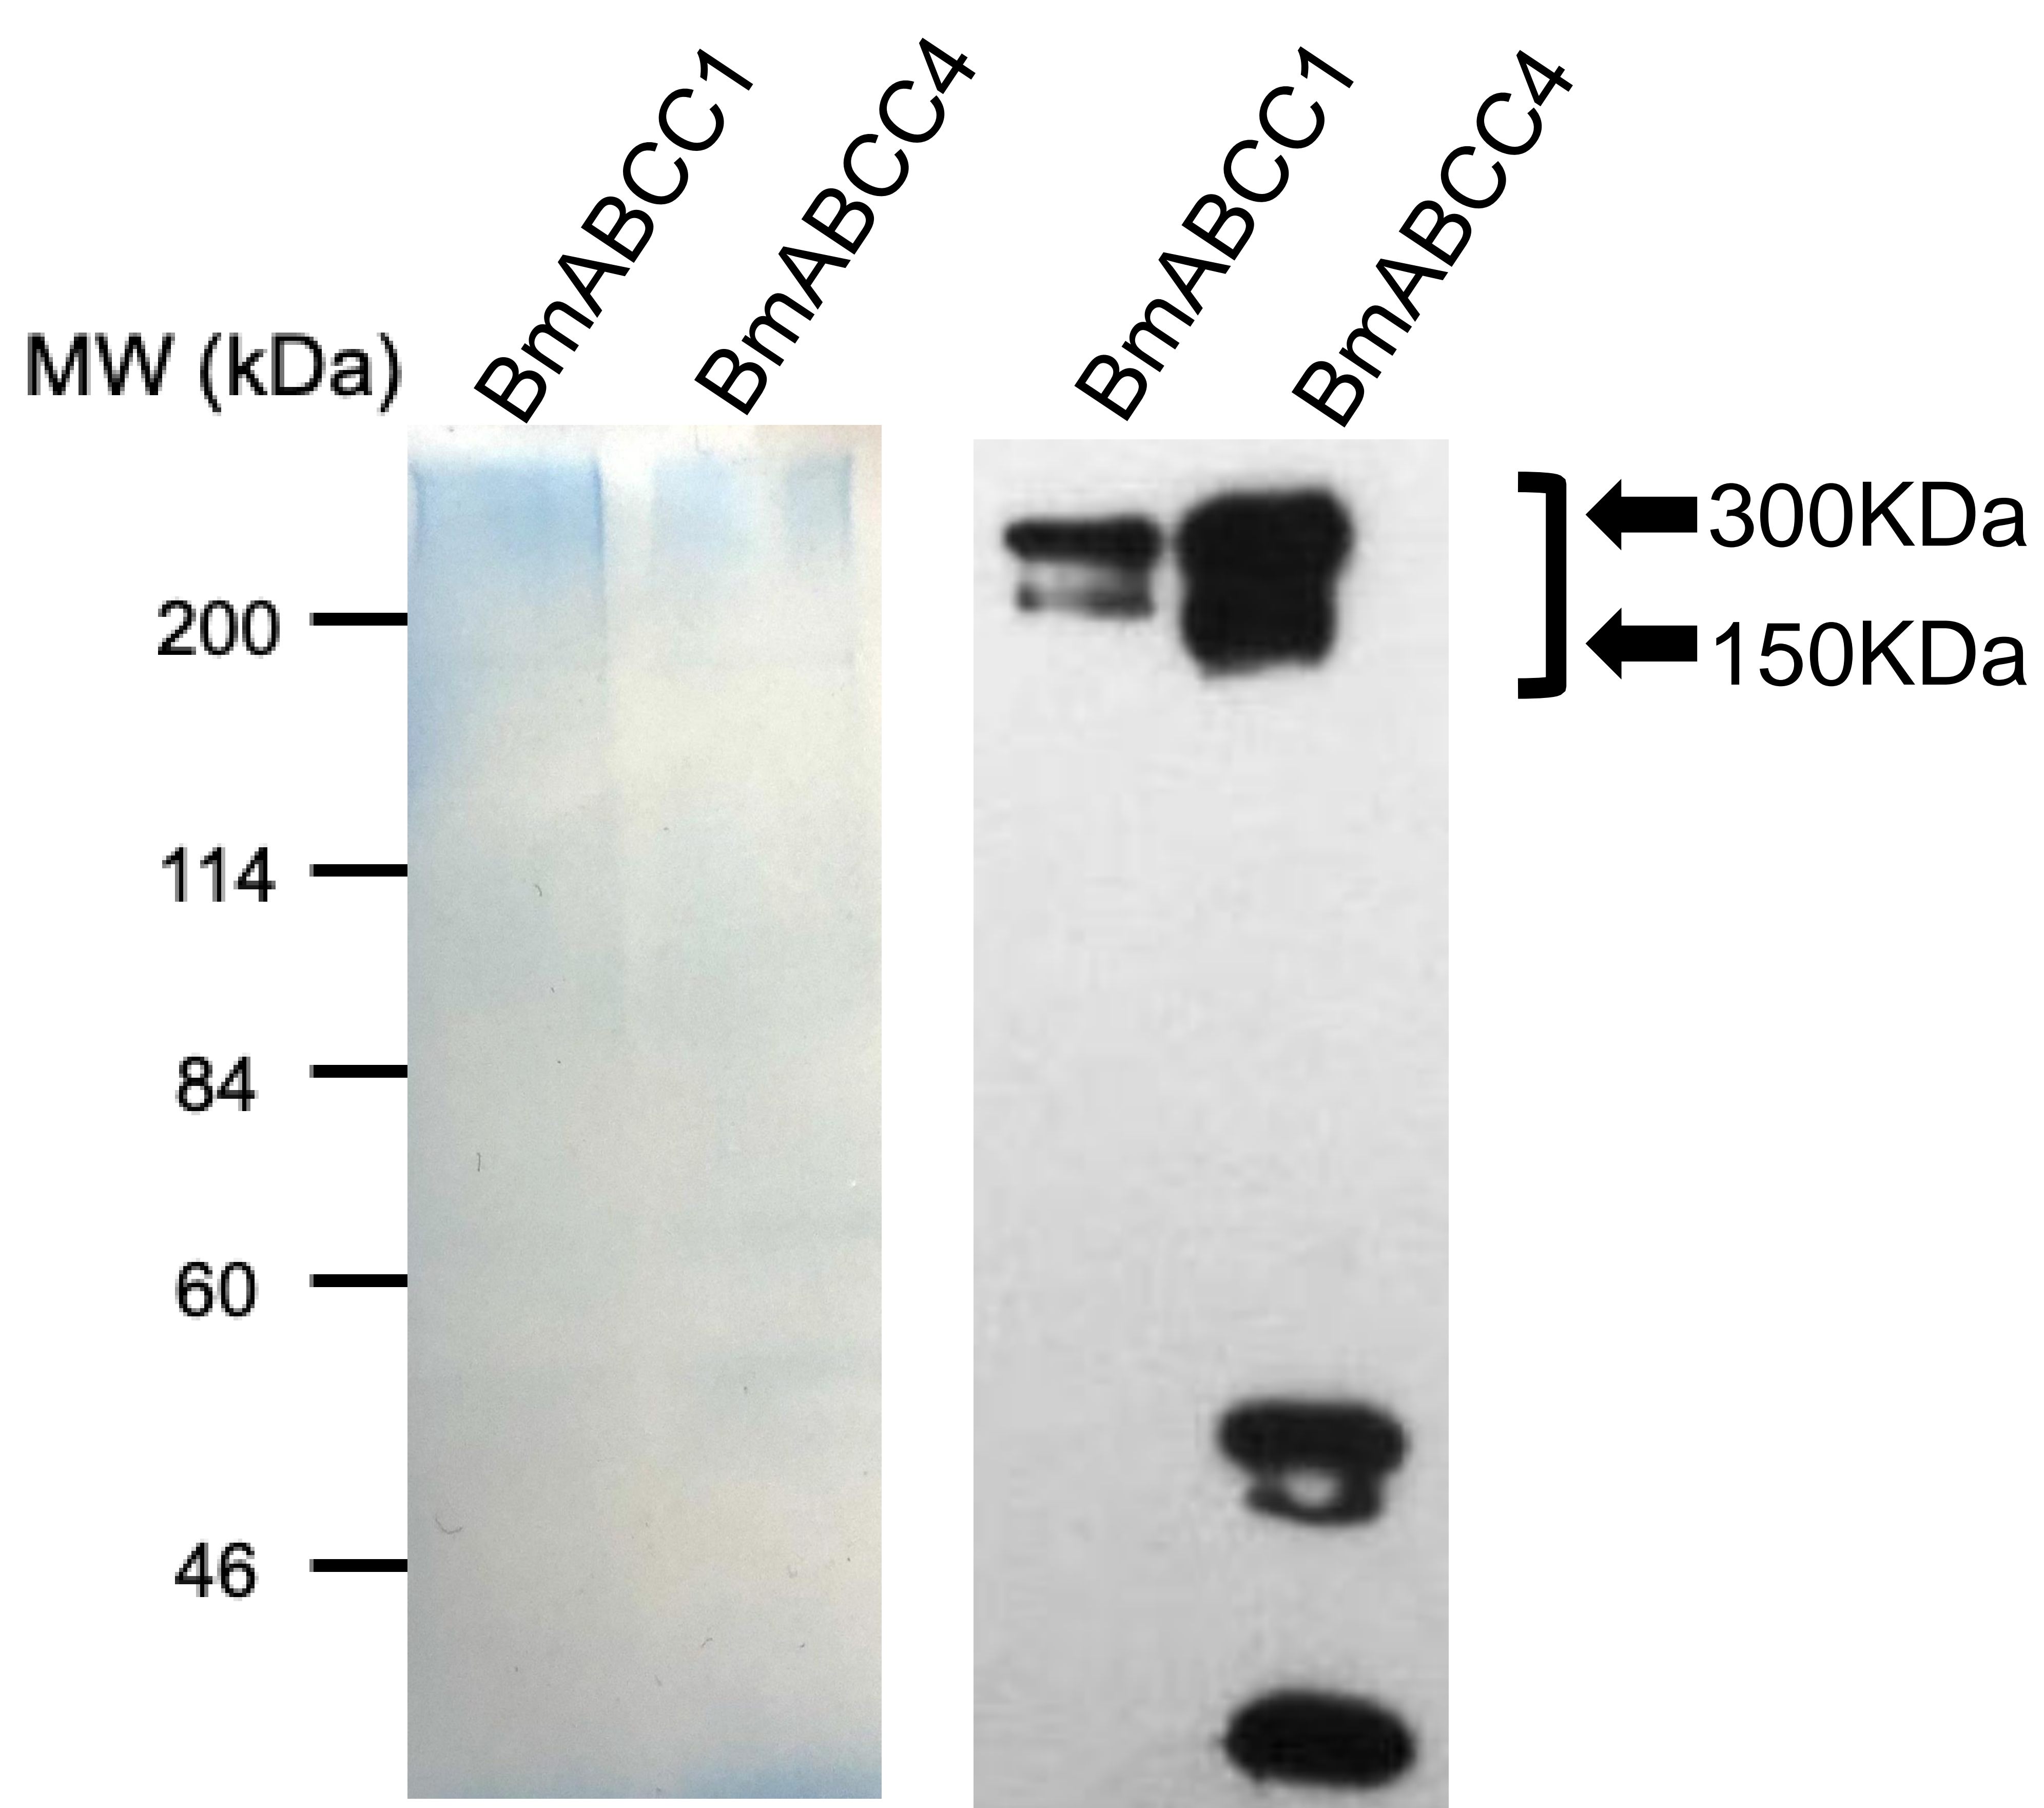

Ultra  
CBB

WB  
(Anti-FLAG  
antibody)

**Supplementary Figure 1.**



A

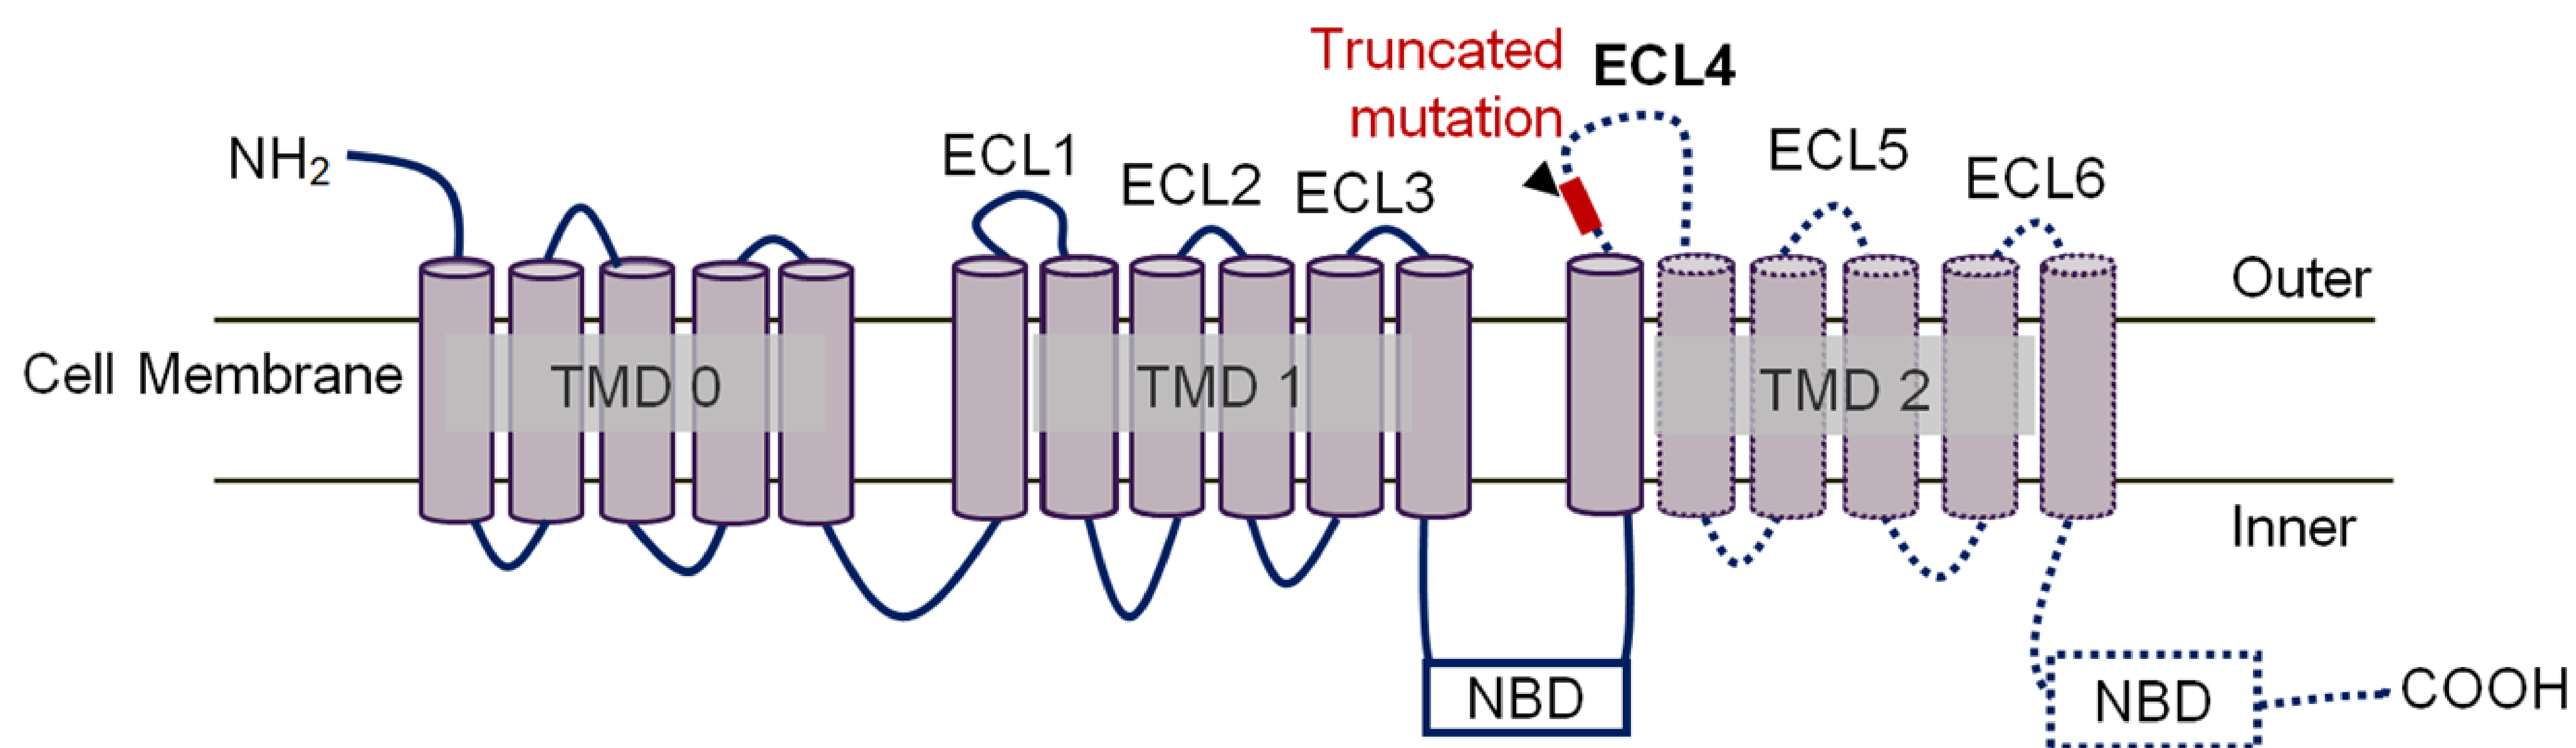

B

Wild    ATTCTGATGAATCTGATCCTGCAAGTGTTCCAAGTCGGCTCCAACTACTGGCTGGCGGAG  
         Ile Leu   Met Asn Leu Ile   Leu   Gln Val Phe Gln Val Gly   Ser Asn Tyr Trp Leu Ala   Glu

C1T09    ATTCTGATGAAT-----GTTCCAAGTCGGCTCCAACTACTGGCTGGCGGAG (-14nt)

C

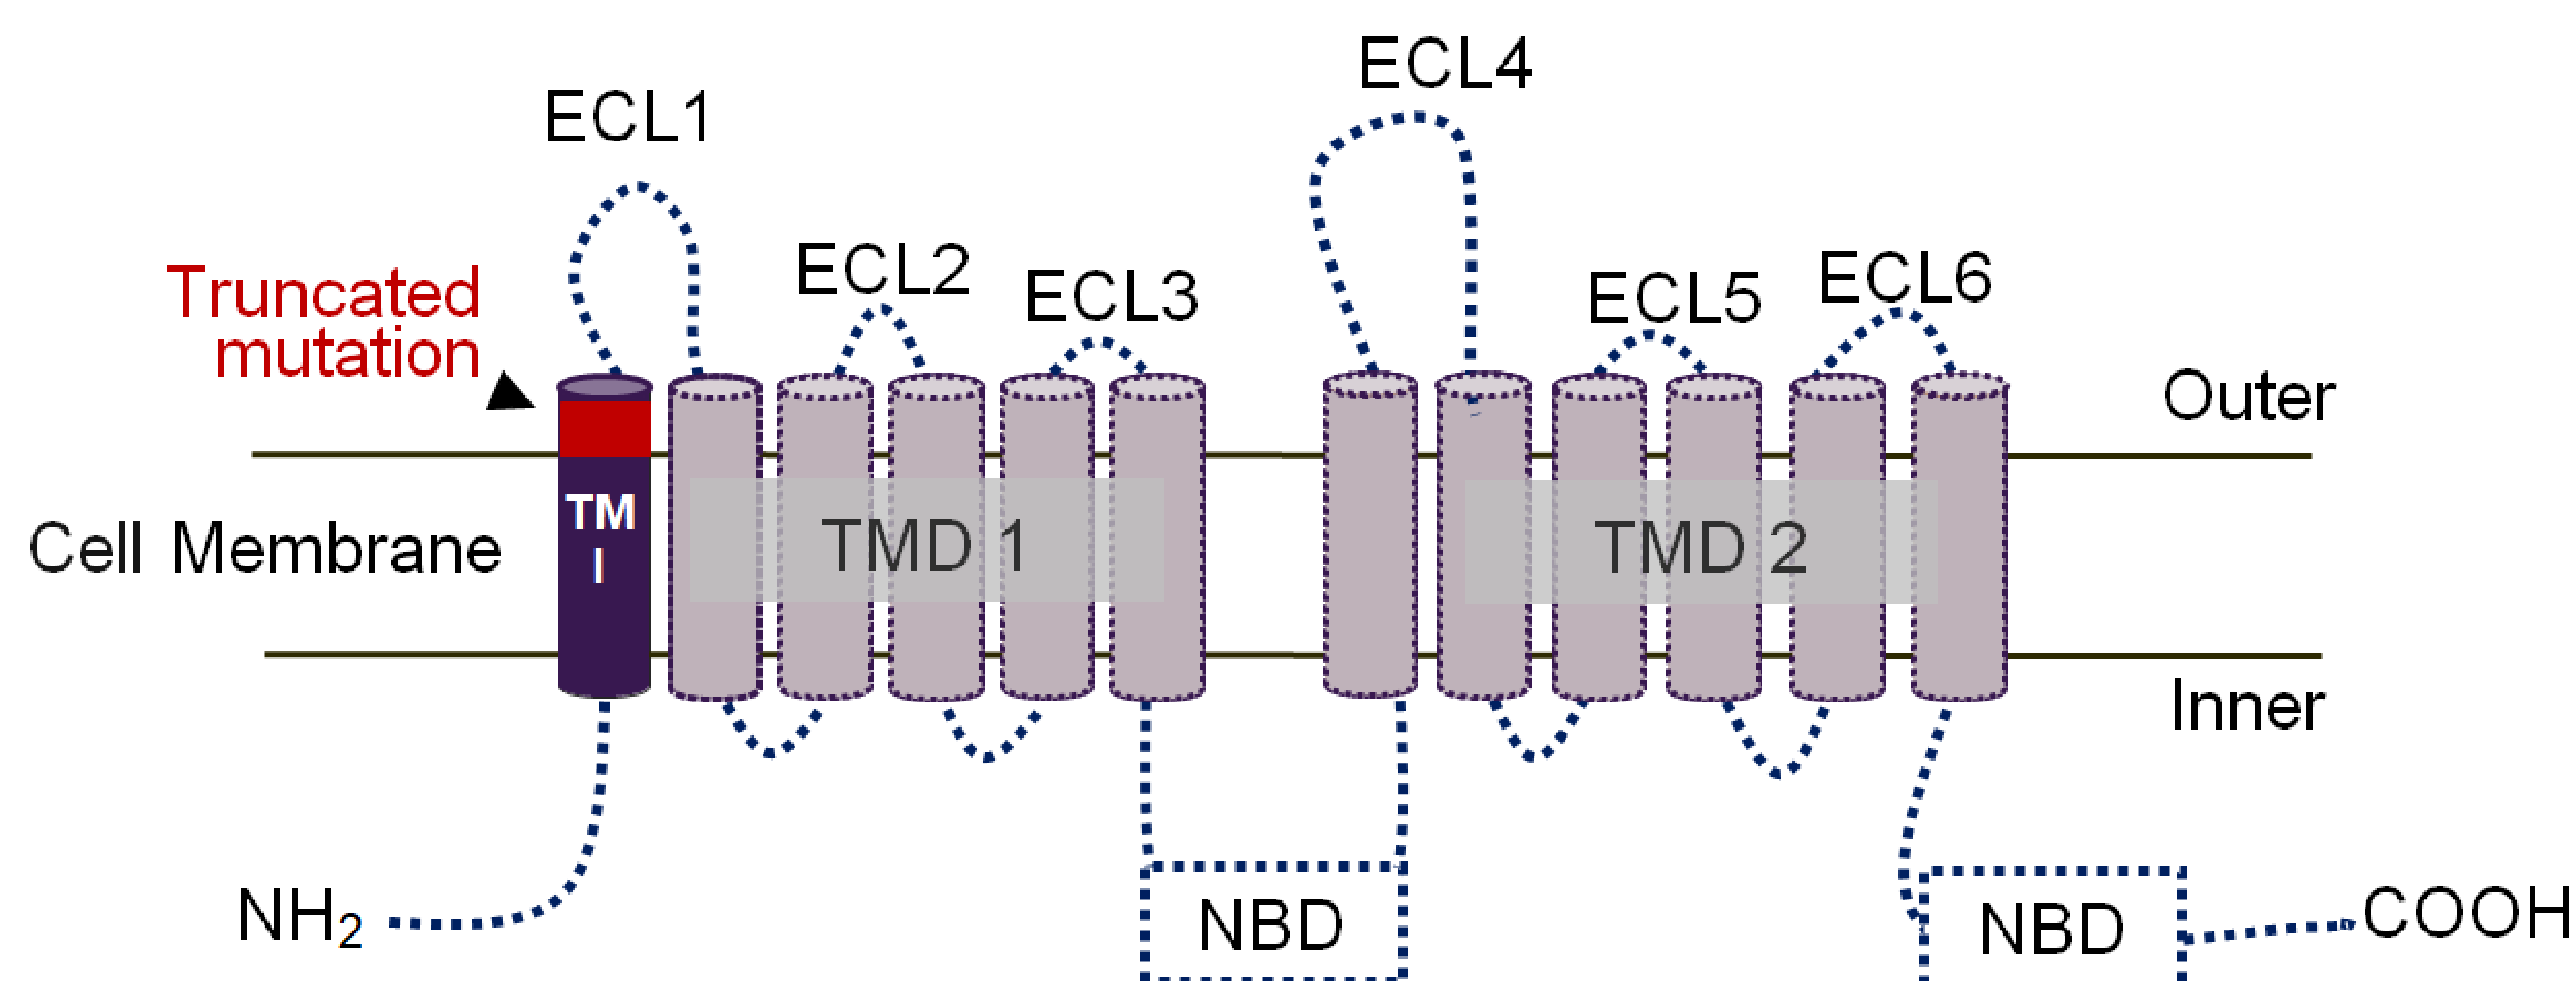

D

Wild    CTGGTTCCGTTTACACTAGCATTGTTTATCGGATATTTCTCTGGAGAAAAATCACCTGAA  
         Leu Val Pro Phe Thr Leu Ala Leu Phe Ile Gly Tyr Phe Ser Gly Glu Lys Ser Pro Glu

C4T02    CTGGTTCCGTTTACACT-----TGTTTATCGGATATTTCTCTGGAGAAAAATCACCTGAA    (-5nt)

Supplementary Figure 2.

A

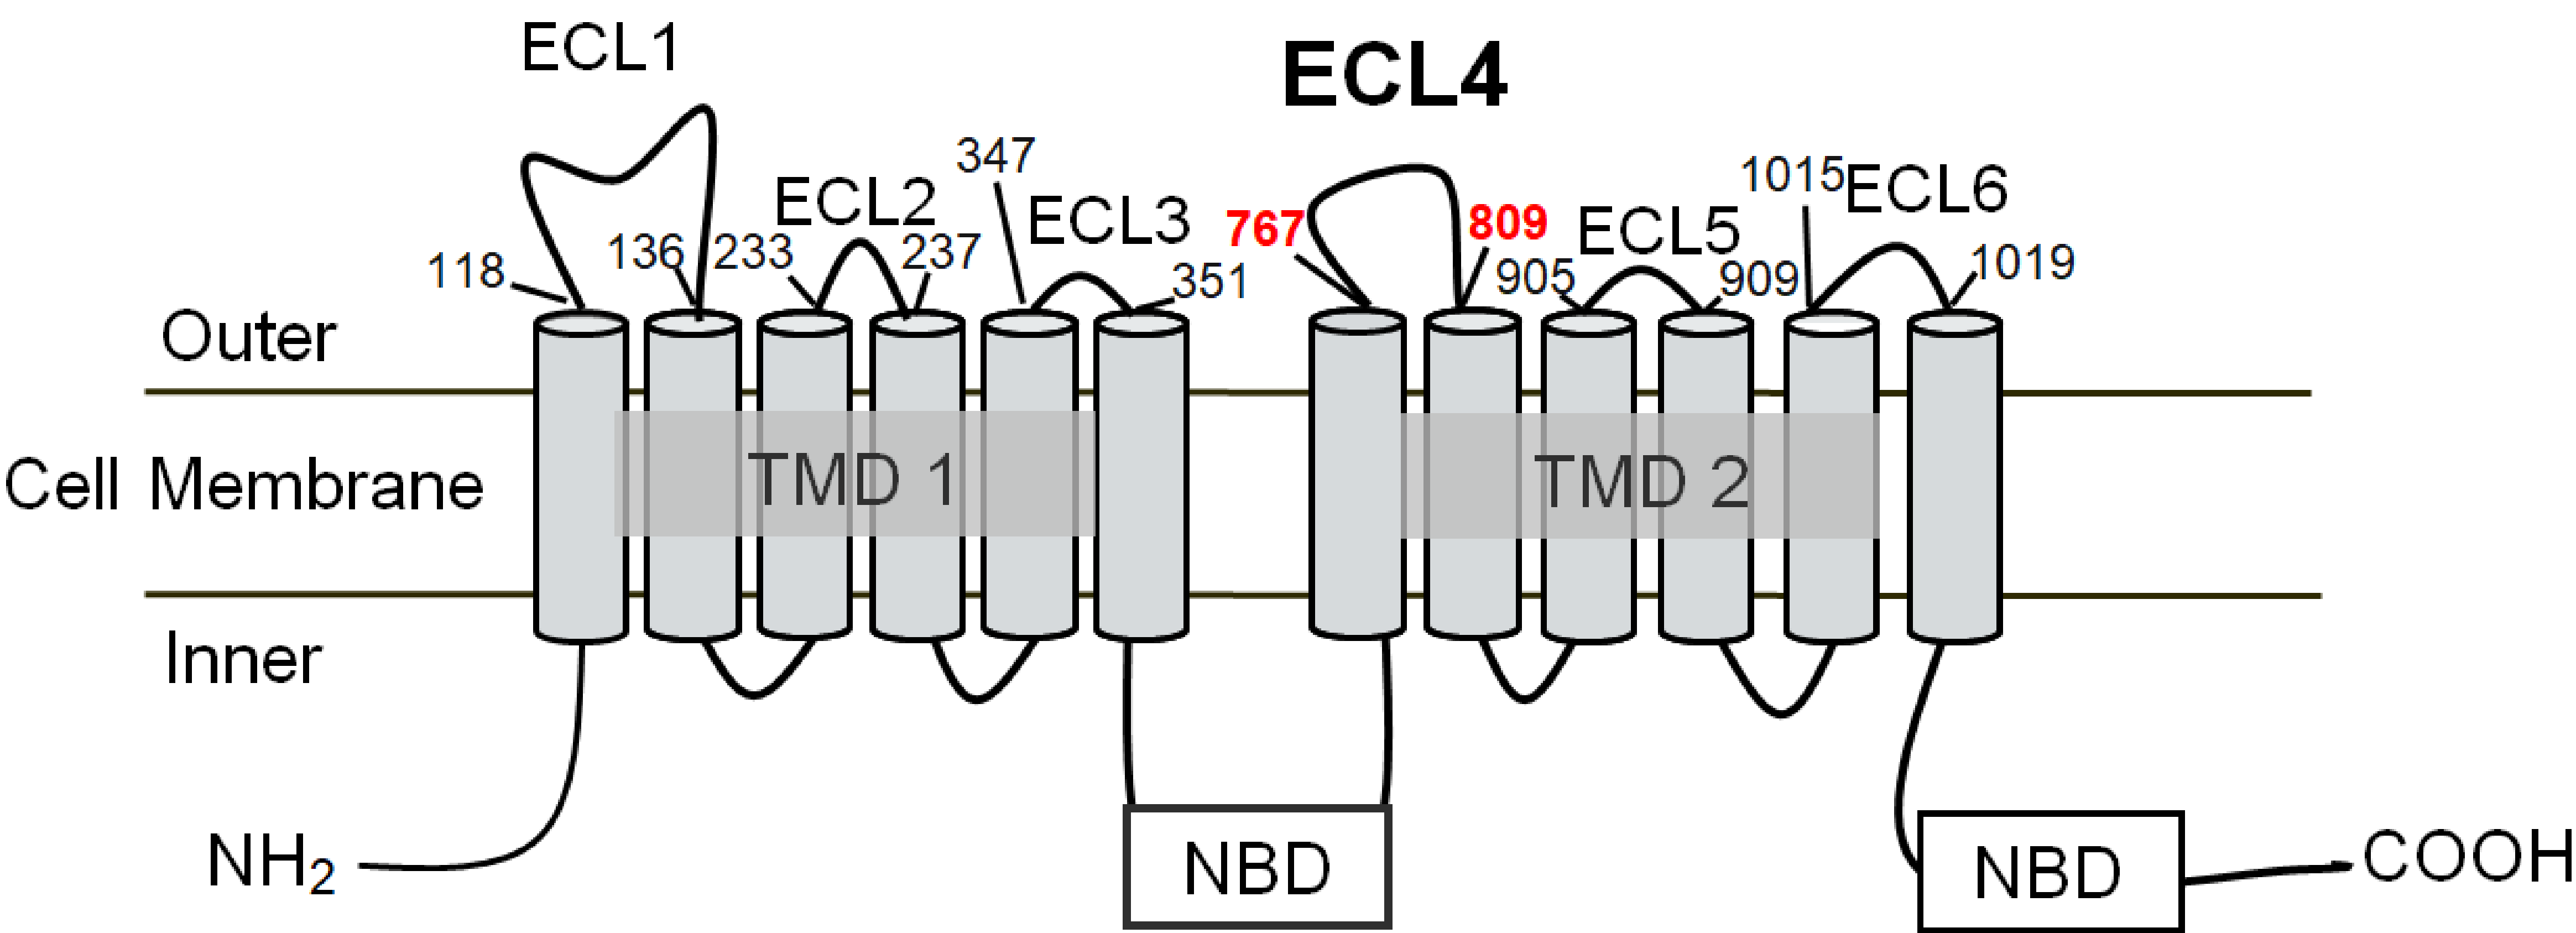

B

|         |     |   |   |   |   |   |   |   |   |   |   |   |   |   |   |   |   |   |   |   |   |   |   |   |      |
|---------|-----|---|---|---|---|---|---|---|---|---|---|---|---|---|---|---|---|---|---|---|---|---|---|---|------|
| BmABCC1 | 954 | A | S | V | V | T | I | L | M | N | L | I | L | Q | V | F | Q | V | G | S | N | Y | W | L | 976  |
| BmABCC2 | 767 | T | F | I | D | Y | W | L | S | F | W | T | N | Q | V | D | E | Y | E | Q | S | L | A | E | 789  |
| BmABCC1 | 977 | A | E | W | S | S | D | S | K | I | I | V | N | G | T | V | D | R | A | K | R | D | M | Y | 1003 |
| BmABCC2 | 790 | G | E | E | P | S | T | S | L | D | T | Q | A | G | A | F | T | L | G | - | - | - | V | Y | 809  |

Supplementary Figure 3.

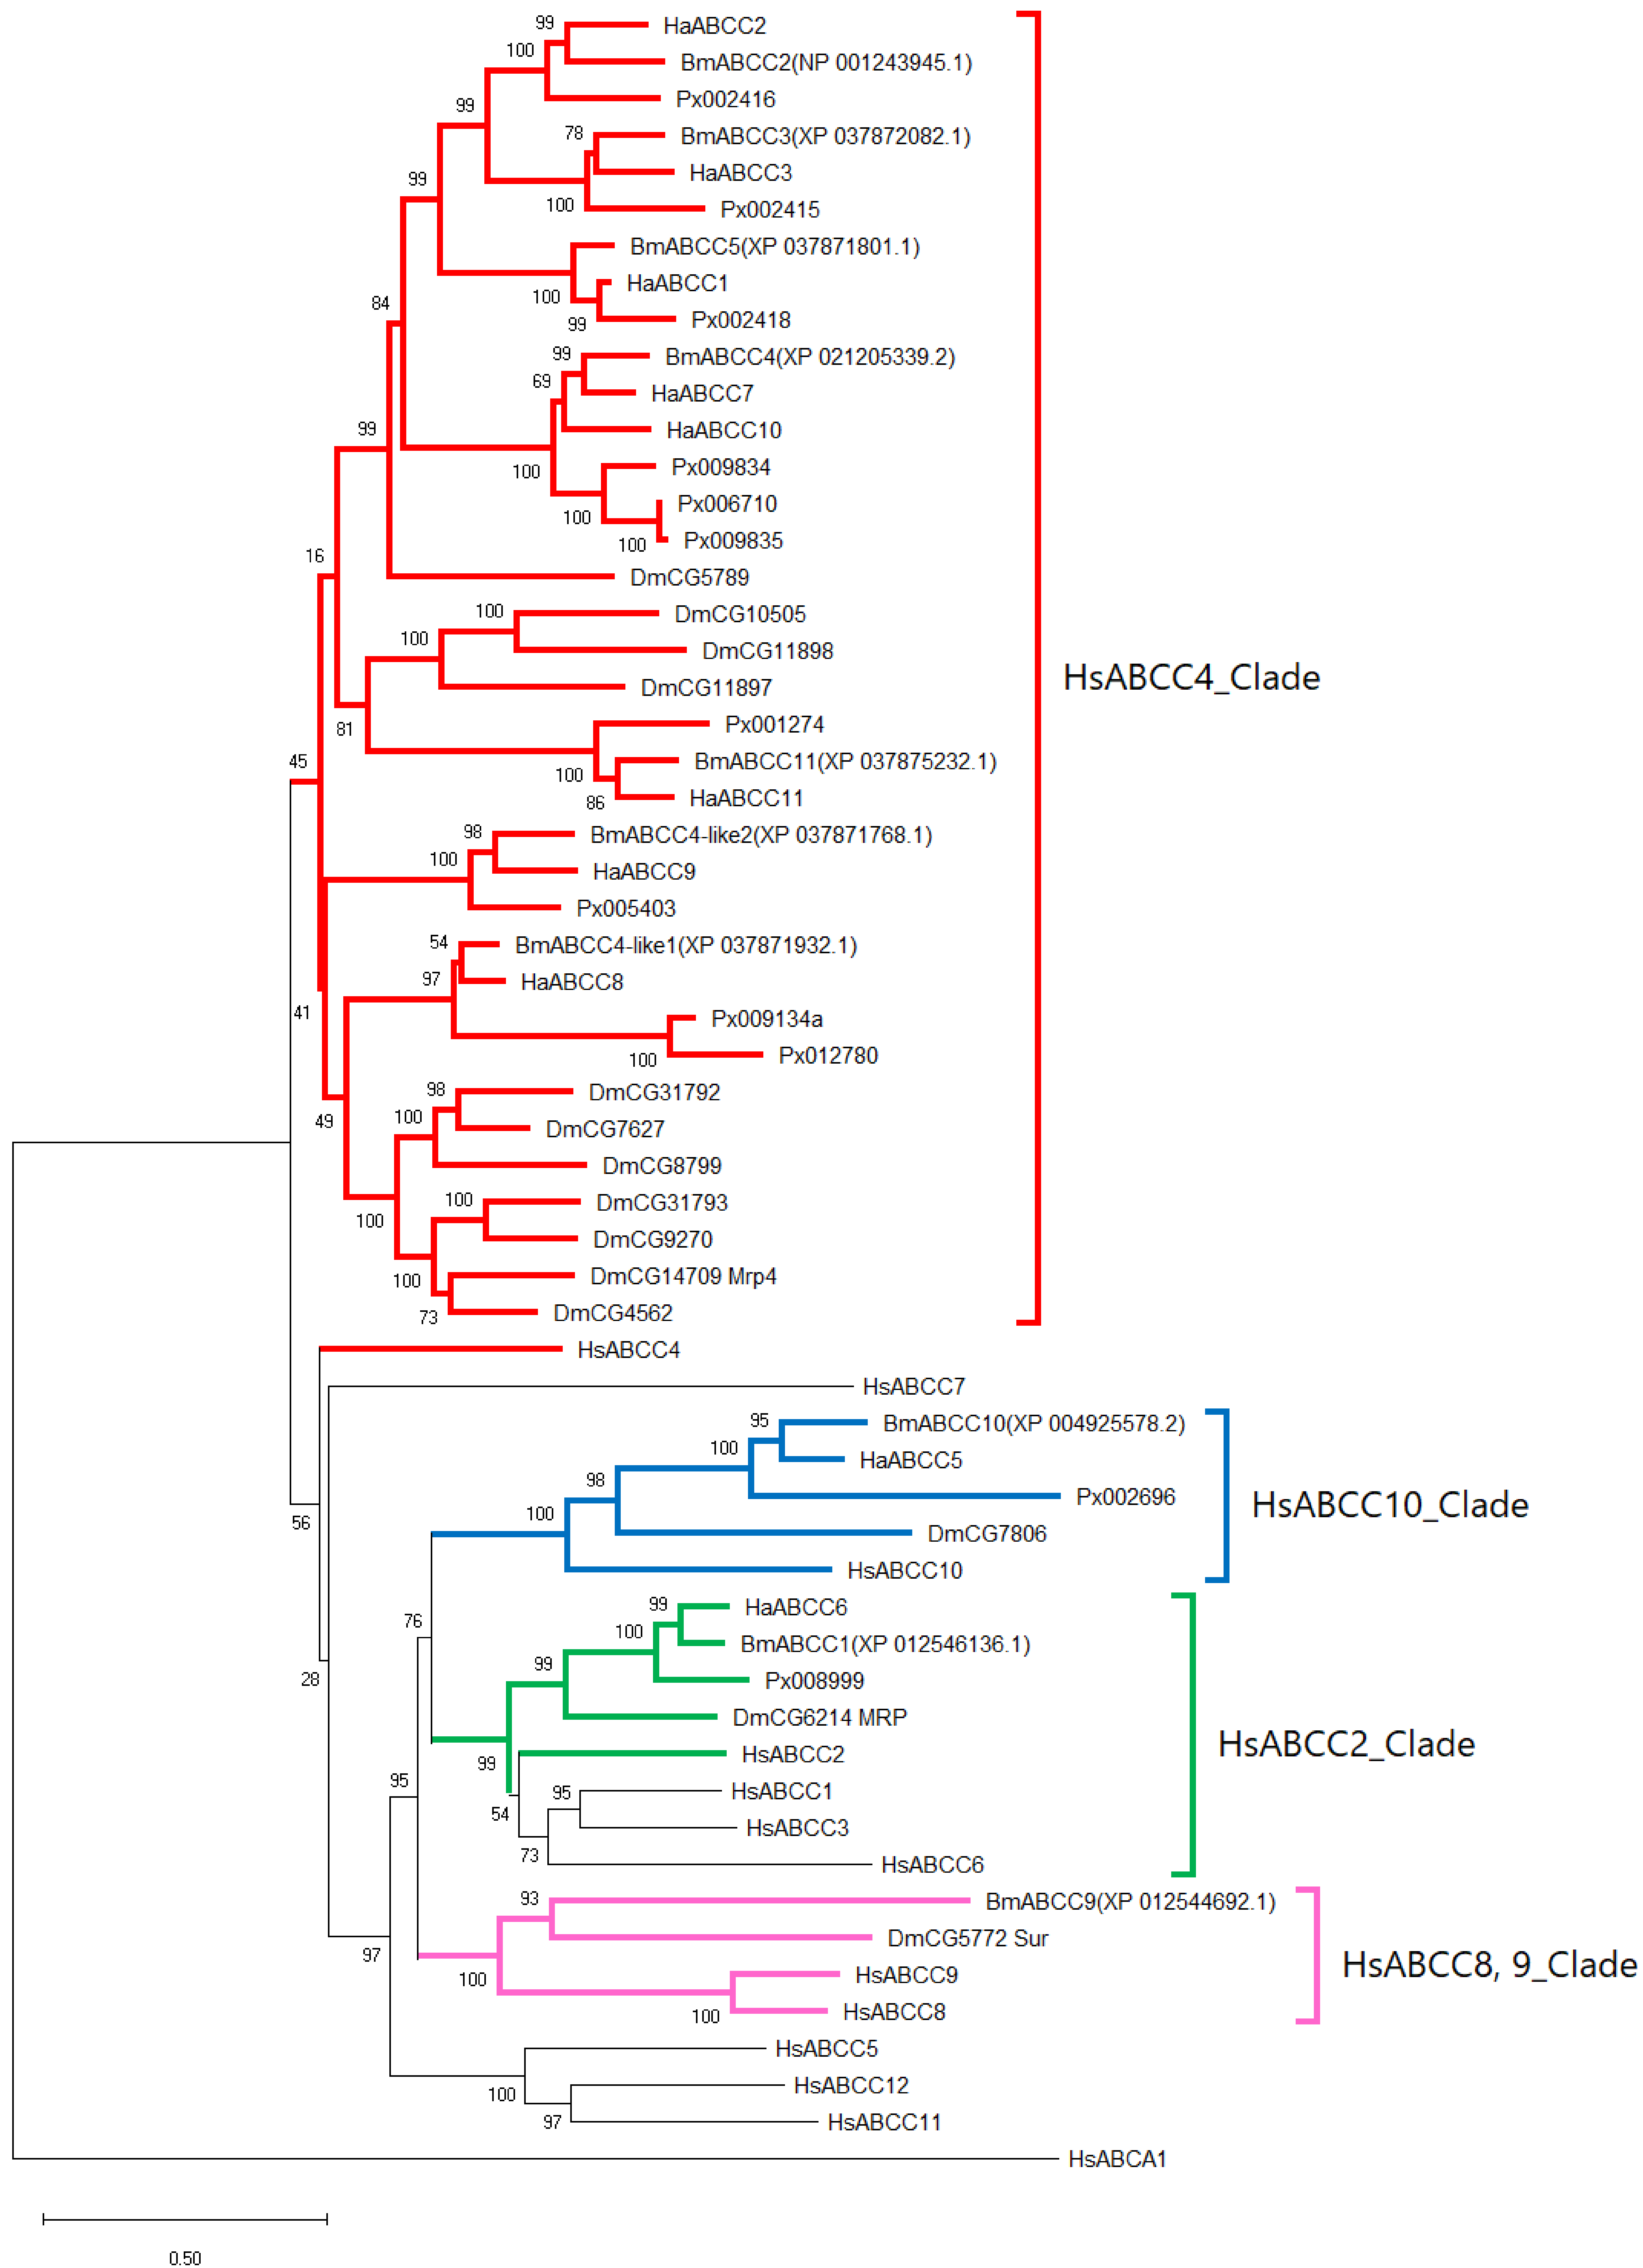

**Supplementary Figure 5.**



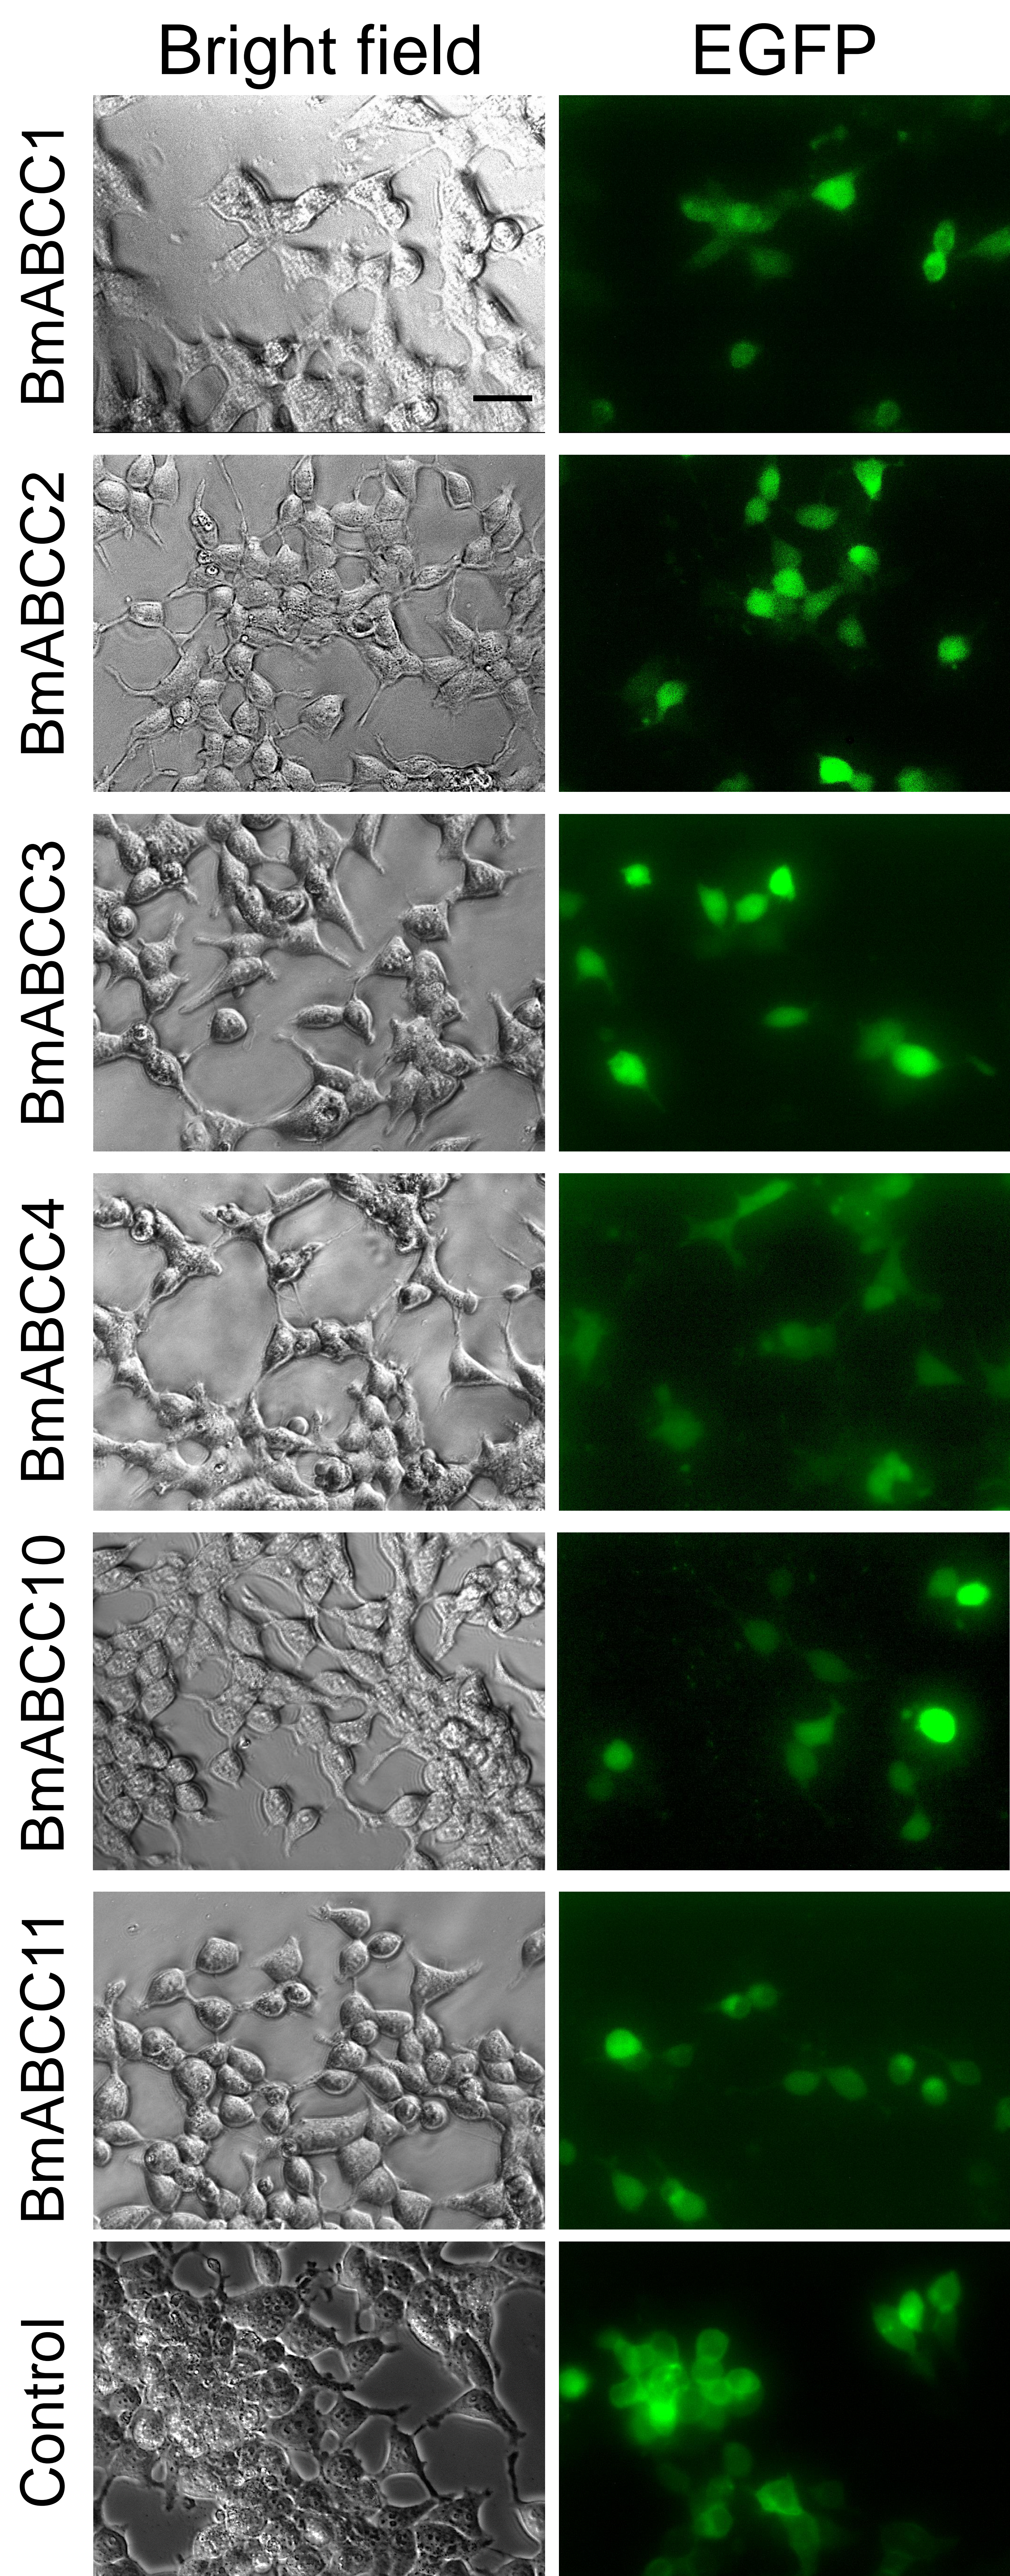

**Supplementary Figure 6.**



A

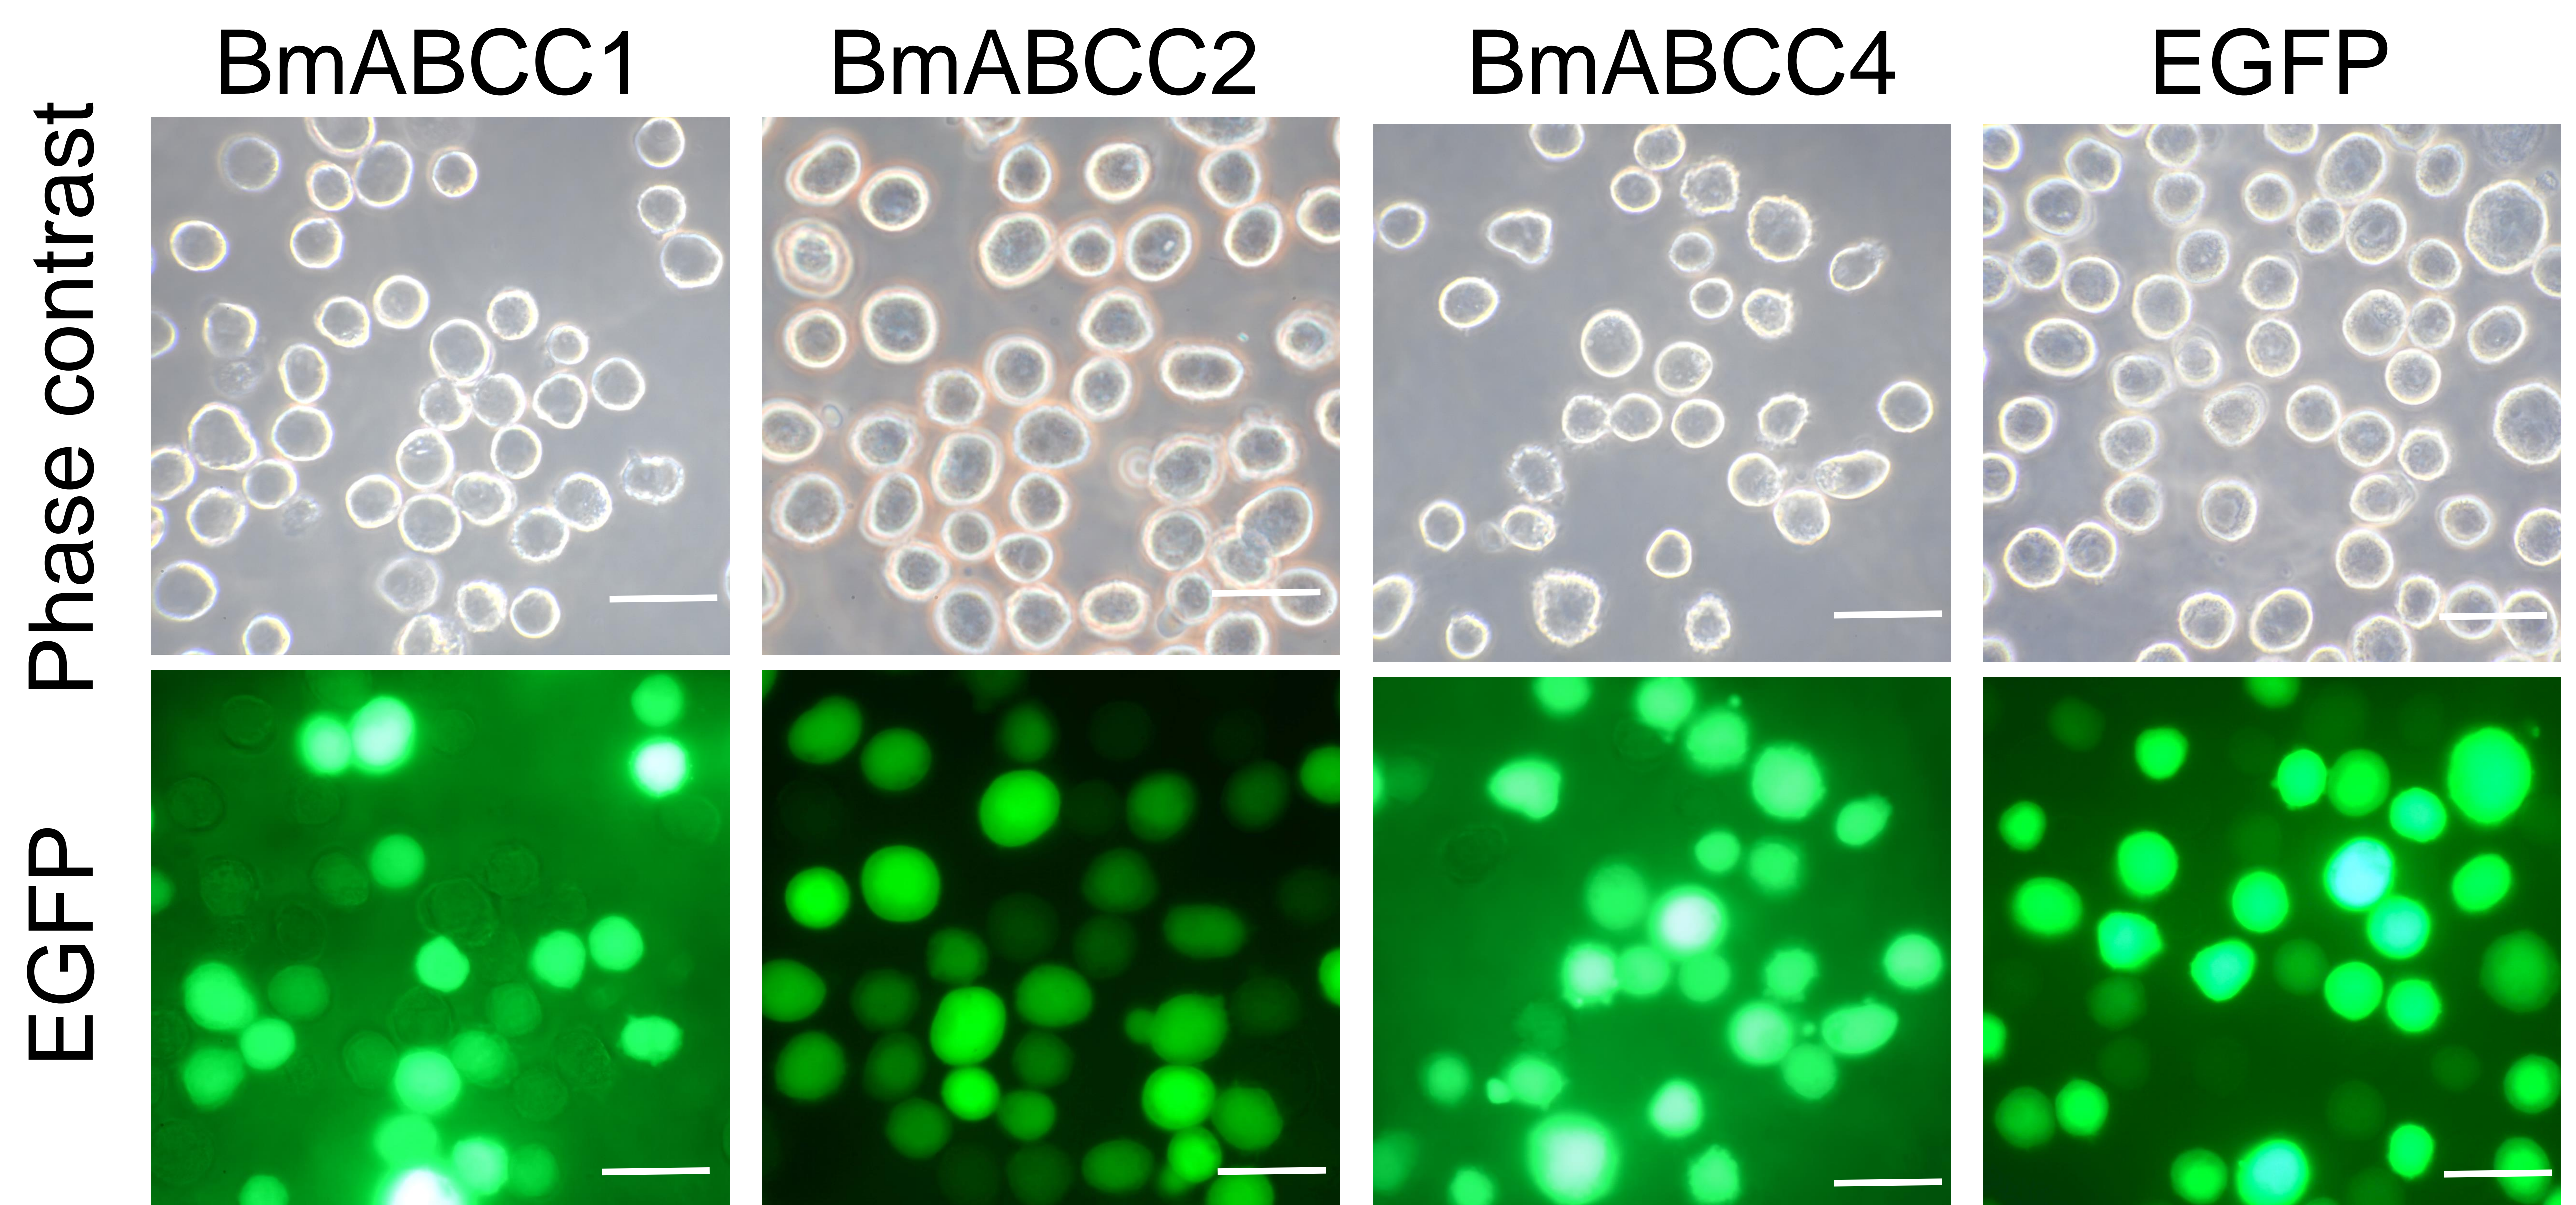

Supplementary Figure 7.



|            | PID    |                                                                                                                                       |
|------------|--------|---------------------------------------------------------------------------------------------------------------------------------------|
| 1 BmABCC2  | 100.0% | -----                                                                                                                                 |
| 2 BmABCC3  | 51.4%  | -----                                                                                                                                 |
| 3 BmABCC4  | 38.3%  | -----                                                                                                                                 |
| 4 BmABCC11 | 32.4%  | -----                                                                                                                                 |
| 5 BmABCC1  | 25.2%  | ----MSYNSTLDSFCGTPFWNSTATWYTDNPETPCFQQTVL I WTPCL YLWVFAFLDLYYIFNSKERNIPWNILNITKLLVTCLL I VLKFVDLGVAVHLSNNGEKEVYNANYSPVIK IL          |
| 6 BmABCC10 | 21.9%  | MSF ILNINWKWEDMCGP---GG LHPWNDATKDFSVCFQELFLQVP---VYF I I AIVSGYFVGYRKDWVIREKTQERA I IFRSFVVLGLAF IP I I E IYIFTTKPDFTL YPVDYFAAGSSCL |
|            |        |                                                                                                                                       |
| 1 BmABCC2  | 100.0% | -----MNSDGRAGENSAAETRRKPHKPN-----ILSRIF                                                                                               |
| 2 BmABCC3  | 51.4%  | -----MGVGSSEKVDEKKKKKQLPTMKEPDG-----AFSRSLF                                                                                           |
| 3 BmABCC4  | 38.3%  | -----MESKVVLNKNKPNHDEAN-----ILSKTE                                                                                                    |
| 4 BmABCC11 | 32.4%  | -----MDPQYFDIERKQDPREKAN-----FLSKLCF                                                                                                  |
| 5 BmABCC1  | 25.2%  | TFGLSATLLFYNRKYGMRASG---VLFFFWLLL VVAGIPQLRSE I IDHKNLDDDENVKYNF ISYMVVYYP---L I VLMF ILNCFADLPKDPYKYQKNQCPENAAG-----FPSRLTF          |
| 6 BmABCC10 | 21.9%  | AWLVHFQYVVALKHRLGRSSRGPMVQLFLWCCTVLLNL IALRSN I ISGSGTGFTAAALCCHVL YFL TL IPSNYSRPTFYSPCLVGSQSHSHSVTPL IPHVDDDVLTGTAMQGNSSFFSKLMF     |
|            |        |                                                                                                                                       |
| 1 BmABCC2  | 100.0% | WWWMPYLVKGNORDIYEDD LIPKKSFNSENGGEYERYWQEYEAAIKEKREPSTWIALRKAYWGYMPGAIYL IIS                                                          |
| 2 BmABCC3  | 51.4%  | CWMFPLFYRCNYRDLEEDLVPPKQYNSKLVGDQLERAWLFEHNARAAGRPSIKVFAITFGWSFLPGGILQFGFA                                                            |
| 3 BmABCC4  | 38.3%  | TWSFTLFKRYKQGISTDDWQARGADHSKQLGDRLEVAVERELERAKQTGTKPSFKATIRSEFWYMLCGITFVGFLFI                                                         |
| 4 BmABCC11 | 32.4%  | GYTLPVFVKGRKQGLSISDYVRCLPYLKATPRGDALGAMTQELKKKE-SGRKPSLAAILRIYGLKFFIGNTIFSLFDT                                                        |
| 5 BmABCC1  | 25.2%  | SWFDP LALTGFRSSLVENDWALNPPDS-----SKECVPKFDKFWERSLKKRELSNGT-----KATYRKTSASVNFKPENKKPASILPALCLAFGGQFLFSLIK-LIND                         |
| 6 BmABCC10 | 21.9%  | TWVNP LQKSL ENKLKDPEELFDIPAEYRSSYIGARMDRALVGNVDHHQQYADIPHEPFI STGYGAIGETVPQASTPVTSTSRVRVHPVRRQNVSLRALHVF AVEFYSIGLLK-LVSD             |
|            |        |                                                                                                                                       |
| 1 BmABCC2  | 100.0% | VFRITQLVFAELSYWSVEA LITREASYYALALLGINFNMCOHNSLFVARFGLKVKVACSSLYRKLRDDQVALGDVSG--GKLVNLSNDVARFDYAFMLHYWVVPVQA                          |
| 2 BmABCC3  | 51.4%  | ILRLITPLLFGELLITYWTVDP-PIIQMEAVYYALSMITINWIAAYLNHHGNLFCSQFGMKLRITATSSMFRKVMRNNGALGDITTA---GKLVNLSNDLQRYDNAETFLHFVWLIPTQL              |
| 3 BmABCC4  | 38.3%  | VLWPLVPFTLALFIGVSGSKSPENYKNAHIYNFLMNFSLITTSMLNLHLQLSQGRVGMIRIRIASCSSLYRKILKLDRTGLAKTEP---GGVINMSNDVNRFDLVVLFLNYIWMPIVV                |
| 4 BmABCC11 | 32.4%  | AAKLSITPLCLEGINYFSPSHGGVPFEHAYLYAAGVVGCMVASAMMHPFLWLLDTAVKIRVGCSSLYRKLRIDLTVGGKATEGLAGHYVNLITTDIAQRFDMASL IAMDILRTPIDS                |
| 5 BmABCC1  | 25.2%  | ILMFISPQLLKLISVKNDE--PDWKG-YAYAVALLCAITQTMLLAIFYIRMYLVGMIRIRIALTSAIRKSLSN-SARKEST--VGEIVNMSVDIAQRFVELTAYINMIISAPLOI                   |
| 6 BmABCC10 | 21.9%  | MAGFAGP L LNKLVFVEDTT--IDEHIGYTFVSL I IATLGSTIFIVQFNWLMSTIGLKMKGALVTTILRKITSVSTETIKAFS--VGEITNFMSTIDTDRIVNSCPSEFALVSTPQL              |
|            |        |                                                                                                                                       |
| 1 BmABCC2  | 100.0% | AVVL YFLYTSAGYAP-VGFEGVVILITLPIQAG LKTSVVRRETQRIDRR K MTE LINGIQVIMYAWKEPFOAIVKVARNE MIALRKSIFIRSVFLGLMLFTERSLIFITCLITELL             |
| 2 BmABCC3  | 51.4%  | VAVCYLGYLQAGVAALIGLASLYVIALPIQGYGNIVGKVRARNAVKIDRILKMSVLSG IQVIMYAWKEVPQKSAEKRSDLEKEVRTATILRTILFGMTITERAALFITILITFI                   |
| 3 BmABCC4  | 38.3%  | PVVSYLWQHTGWATLAALIVIFLQTQVYVQAYSNMQGYRGKIAKRIDERVKVMSFLVNGVQVIMYAWKEPFEKLVDKLRLKVHYIMRTSMKGFSTASVTERILFAATIVAEVV                     |
| 4 BmABCC11 | 32.4%  | TITIIYLMYRQIGVATLIG-VAFLLFIPQGYGKISSNLRKRVAVRIDHRIRLMNVVQSL EALIMYAWENAARITGDARKKKNVIKXSWLRAYMISCVKLNTRVALFSIISYIT                    |
| 5 BmABCC1  | 25.2%  | ALALYELWAILGPSVLAG-LAVMILITIPVNGLIANRVKTLQTKQMKYKDERVKMNEVLNGIKVIMYAWEPS-EDQILQIRNKEVHV-KQTAYLNSATSF IWSCAFLVSLMSFGCIV                |
| 6 BmABCC10 | 21.9%  | FITFLYQQVQLSFLAG-VG-SVILIPINKL IANKIGQLSTELMKHKDTRVSLISDLLKGI RTVAVHVVEDYVDVRYSGARAEHRYLRGRKYLDAYCVVLWATIPVLVAAL LGLTHAL              |
|            |        |                                                                                                                                       |
| 1 BmABCC2  | 100.0% | IG--NLVTATITPTIQQYISTIQNTIMLPLATASSEMVSERIQNFLVKDEREDVQITPKSYGDDNRITFN-----NKASGPQNETIFPKKYATDGGASTITN-----                           |
| 2 BmABCC3  | 51.4%  | LG--NALSATITVYLPQQFMNAADNITILILPLILTFTAELMVSRRVQEFLYAEDRPDLVKRDSLMPAGSNIFRN-----VTGSFRKSEPTVRPLSYSQKTEILPTIDFSSNNLV                   |
| 3 BmABCC4  | 38.3%  | MG--GEIRSEITFSLVOYFNLLQACNITFFPLAFALASKVSVSRLLEEFLLLDEIDTKQNEPIKAAMDSLIL-----TNGNAKDTEKIK-----                                        |
| 4 BmABCC11 | 32.4%  | LG--NELTAAKVFTLSYYDILKYTVDFPLAITFTL EAYSVKR IQEELLPVDNQDGVDLVTIEKTQVQGVFEKIGNGQQAYVKSEAN-----                                         |
| 5 BmABCC1  | 25.2%  | VNDKETLDSEKAFVALSLFNILRFPLS-MLPNVLINNVQTSVGIKRLNKMNCDEDIS---SVDHDKKEPSPIVIE-----NGNFTWGE                                              |
| 6 BmABCC10 | 21.9%  | RG--QPLEAPTFTTVALINML IAPLN-AFPWVLNGITAWVSIKRIQKLDLPDMNSEEYDRVNVNRDEDK I I IFR-----NATFAWARPMKRD-----                                 |
|            |        |                                                                                                                                       |
| 1 BmABCC2  | 100.0% | ----PVLSTDPAVCDYPIE SKVDATWSSSTIDISEMIRN LIRIGRCKCATIGPVGSGKSSILOVLLKEPVCGGSLRINGRLSYACQESWLPATVRENILFGLPYDSQ                         |
| 2 BmABCC3  | 51.4%  | KRNN SRLRRMSHLDJITAVVLDVVSASWTGDPNFLAIRNISMKLKRGKCVITIGAVGSGKSSILOQLLKELPATG---IVSTIYG-KVSYASQEAWLPSTVRENILFGLPFEPE                   |
| 3 BmABCC4  | 38.3%  | -----SKSTGLSITGVVSASWSTDPIVHITRNITSAEPGEFVG IAGLYGACKSSILOVLLGEPKPSQG---TVSLDGAIRISYASQEPWLPFATVRENILFGLPYDKT                         |
| 4 BmABCC11 | 32.4%  | -----LENLKPOVLVSMKDFNAHKNAEDESMQKVTALAVNITIKPETITTVGTGVGACKSTLQATIREITPSSG--HLEVNG-VVAYAADPWLEASVRENILFGQELDLR                        |
| 5 BmABCC1  | 25.2%  | -----KDADPVLKTNVNPVRGSLVATVGAVGSGKSSLAAMGEMNKISG---RVNTHGSIAYVPQAAIQONATLQDNILFQKPLQQQ                                                |
| 6 BmABCC10 | 21.9%  | ----NMKNKEKGKSNKNKRKLN IQRSDSLTSEEGGQDAPFTLKDISLEIGREEF IGVGTSGSGKTSLLAVIGMLKKNGLDQEPESLNSFGYVAKPWVIRGTIRNILEGKPYDET                  |
|            |        |                                                                                                                                       |
| 1 BmABCC2  | 100.0% | KYHEVCKACSLLPDFKQFPYGDLSVGERGVSSGGQRRINLARAVYREADIYLLDDPLSAVDANVGRQLFDGCTIK--GYRGRITCVLVTHQIHYKAAADITVILNEGATENVGSYDD                 |
| 2 BmABCC3  | 51.4%  | KYKMYCKACALEKDFKQFPYGDITLVGERGVSSGGQRRINLARAVYREADIYLLDDPLSAVDANVGRQLFECCIN--GYRRIRILVTHQIHYKAAADIVLVMNEGRIENMGTFDEL                  |
| 3 BmABCC4  | 38.3%  | RYKKVYTACALRDFEQLPAGDCTLVGERGTSGGQRRARVGLARACYRQADIYLLDDPLSAVDITHVGKHLVSECVN--GLQNHIRILVTHQIHYKKTADKVIILRNGETEMQGFEEA                 |
| 4 BmABCC11 | 32.4%  | RYKQVIRCCQLKSDLETLPHEGKTIVGERGASGGQRRARISLARCVYQNDVYLLDDPLAAVDAKVASAMYEECVR--GMRDKAVLVTHVQYARGASNVLIMRSCKITVAGGTVEE                   |
| 5 BmABCC1  | 25.2%  | SYNNVINVCALKPDEDVLPGGDQTEIGKGINSGGQRRVSLARAVYHEADNYLLDDPLSAVDSHVGKHI-DKVI GPAGLLKDRIRVWVTHNVSLAQTDLVVVRDGGQVSEAGSYQHL                 |
| 6 BmABCC10 | 21.9%  | KFKSLIDACALTEDNLVLGWN--AYVGEGGCTSGGQRRARIALARAVYQDKQVYLLDDVLAGLDARVSGHVLCQL--MGLRHTIRLFAQSPKHLARVSRLLVREGRITVNLGPPMET                 |
|            |        |                                                                                                                                       |
| 1 BmABCC2  | 100.0% | VNTGTEFSKLL-----INQESNDNENGPEKNFLRAISKISTKSVEDPD-----NEKVQYEEEEKRAKGNKFSVLKYKSAVKSWEVLVLMVYLVIITQ                                     |
| 2 BmABCC3  | 51.4%  | TAAGKAFSLML-----SSLQETSEKEDIESLGRGKEEKNPVLFKNQLSITETDDE-----QFEAQKMADEFRQSGN KWSVIAAYFRAGGNICFLFLTLLITL I A                           |
| 3 BmABCC4  | 38.3%  | SRCLPFSMEEE-----EDEPDEKNL KHLR-----KRTISIQKTSVSTTHDGSQ--VDVEDEDKSEELTGSGRVSGLYMSYFRAGGGWALFWTLFSIILAQ                                 |
| 4 BmABCC11 | 32.4%  | KSSVPEEKIL-----EMGKVVEEKLKQKAASYENQESIIEHKLKQRSMSQASQMSFNIDLDNLDPKYEGSQGTGSVSNVSYMAYVRSGGNKWSMTLIALFLVAQ                              |
| 5 BmABCC1  | 25.2%  | LEKKGAADFGLHHL-----SDIEKTSPPDEL DYLKQDLETKLGTGFQNKLRARSLSESTSESEQTPAGDRAGSVKQXTPDALTQSNLKEKNKLIEAEK--AETGSKWSLYK                      |
| 6 BmABCC10 | 21.9%  | LHDIEFYLPSDSESLGDDLPRQKQIEGSDEDNISRNSLDDEETVSEGTVGFWVIGLYLKSVGIFLTVAITLSLILMQVSONFTTFWLT IWLKNRTKNSTALTDSEFNHENTTVLDHSFN              |
|            |        |                                                                                                                                       |
| 1 BmABCC2  | 100.0% | GCAITIDYWSPWINQVDEYEQSLAEELPSISLDITQAGAFILGVYLWYGGVILITLIVSHVRILITFVITIMRASSN                                                         |
| 2 BmABCC3  | 51.4%  | ASSAGADYWLISYWINAMAAYDEELAG-AEVDITLDVOVGLFITGQYMIHGAIVLVTITLITNIRVIPFAELCVTASSR                                                       |
| 3 BmABCC4  | 38.3%  | AVTSMSDMWITHMNDVEVYLTPTTFETDLLIDRNETNNLNL TSEVPTVVDSAAFPNNLTVIGTIMKTAMAIQNATEIERENYNHSYYIYIWAIGILGCIILTTARSMMLWYCVRRSSIK              |
| 4 BmABCC11 | 32.4%  | FYSSSTDVWLKEWYNLEEKNVINVTKNNDLSPETL FKNMPSNYHLIREQCYYIGGLIAYCVFTFWNKLVTYNTICIRASIS                                                    |
| 5 BmABCC1  | 25.2%  | HYLMSVGVFASVVTILMNLILQVFQVGSNYWLAEWSSDSKI I VNGTVDRAKRDMYLGYYGALGAGQAIASFFADIMPYLACWRAAKV                                             |
| 6 BmABCC10 | 21.9%  | AVDGI VHKLINTTMMLINSIDGHKNNVSEPSSTLTNARATLEISIPQYNDNFYLEAYFGLAGLNLVFTVMAFLIAYGGVKAATK                                                 |
|            |        |                                                                                                                                       |
| 1 BmABCC2  | 100.0% | FHDIVYKKLITIVMRFFDMNPSRVLNRFSKDGMAMDEFLPRS FETVOYLYLCSILILNATALPWLTIPITAVLLILFFVLLKWLNAACAVKRFGTTKSPVLGMINSTIGLSTIRS                  |
| 2 BmABCC3  | 51.4%  | LHNSMFSTMKGIMRFFDITSSSRITLNRFTKDMGALDEILPRTLDVLQIYATIGAILVLNATALYWTIPSVILLITFYFFVLYVLYKTQCSIKREGTTKSPVFGMVTSSLNGIATIRS                |
| 3 BmABCC4  | 38.3%  | LHNQMFSNIAATMRFFDITNPSRVLNRFSKDQGVVDEILPRMFLDSIQIFMVMIGILVMVAIVSPMMLTIVVCGVLYLWTVVYLTIAQAVKRVGISRSPVFSHYASMAELSTVRA                   |
| 4 BmABCC11 | 32.4%  | LHDNMFKGVYAPMWFFHNHNSRITLNRFSKDMQGVVDITLPLAVDCLGFFLEVLALVVVCLVNWVILITPVVAALLRAMFLATSRDLKRLEAIARSQSNHYVSGTVHGLPITIRS                   |
| 5 BmABCC1  | 25.2%  | IHELLLDNVLKPLQFTEVTPICRILSRFGKDVVDLITSLSEASDVITCYFEVLGTIVFSVSTPLFVITVPVGLIYYVITQRFYVATSRQLKRESISRSPIYSHFGESTIGASTIRA                  |
| 6 BmABCC10 | 21.9%  | IKVLLKVIIVRAQVKFFDVTICRIVNRFSSDITYTVDSSLPFIINILLAQFFSIGALAVTIYGLPWLVGVAPLAFVYYRLQRYVIRITSRQLKRQSVITSPITYTHFNDITLEGSSIRA               |
|            |        |                                                                                                                                       |
| 1 BmABCC2  | 100.0% | SNSQGRLLQFDNAQNHTSAFYTFVGGSTAFGLYDALCLVYLGVILTIFLYIDFSTIPVGSVGLAVSQSMVLTMMQLMAARFTADFLGQMTAYERVL EYTELPMEE-----NM                     |
| 2 BmABCC3  | 51.4%  | S-GAEDRLISNFDVLQDHSSAWNGYLGQGITFGFYDITMCLYLITVILVITFDGNVIAVGSVGLAVTQSNITLAMLQHGARMVLVELAQITSVERVLEYTKIESK-----NL                      |
| 3 BmABCC4  | 38.3%  | C-NAEMMLADQDDKQDVHTAAWYLTLVNTAFSIWLSLSALVYIVVAYTELLDGG-TIKSGNVGLALSGQLILVNMVQYGIKQITTEVISQMTSVERVIOQITSLPEK-----TE                    |
| 4 BmABCC11 | 32.4%  | TROHRAIVAEFDKLQDHSAAWSLVLSTNRAELGWMDWVCCMYALVTFSEFV-ASG-DTIGGSVGLAITQVIGLVGMCQYGMRTAEVENQMTSVERTLEYRNLPPHPLETDEAAIR                   |
| 5 BmABCC1  | 25.2%  | Y-GVTRDFIEESESRYDHNQSCYYPSCIANRWLAIRLEMIGNFIIFSAAVFAVLGR--NSIYPGIVGLSISYALQITITQTNWLVRMISEVETNIVAVERIKVAFETQGA                        |
| 6 BmABCC10 | 21.9%  | L-GGAAAWEEERGCELVESWQRAALSASAAQWLARLQAAAVLVYAAAALAVLQRTLHTADPGLVGLAISYALSMISL SNVLNSFTETETEREVI AVERVGEYIRQVEIS-----                  |
|            |        |                                                                                                                                       |
| 1 BmABCC2  | 100.0% | YDGSQ-LPKDWPITHRIEFQNLFNYSQEDPVLKDLNFVLENGWKVGIVGRTGAGKSSMSALFRYEQL-HIRDGDITNIAKTERSKSITIPQEPILFSASV                                  |
| 2 BmABCC3  | 51.4%  | FEQKQMPPTWPAICRIIMDVLSLQYAPEEALVLKNLNIIVLESGWKVGIVGRTGAGKSSLSALFRFAYIDG-SITIDGLDTSVLSKQGLRSKSITIPQEPVLFSAIT                           |
| 3 BmABCC4  | 38.3%  | G---PAPPSPWPQRAVVKDNLRYQKDSQVLRNLNITILESGWKVGIVGRTGAGKSSLSALFRAPITEG-HIYLDVETIGEIALKALRSKSITIPQEPVLFSAITL                             |
| 4 BmABCC11 | 32.4%  | KNHPGLDLSKWPITKGEISFNVYLEVEKPKPGKNEAPRPEAPVYATKGVSKVQPAEKVAVVGRTGAGKSSLLNALFRSRIAG-TVSVDQVTAEQVGLRCWR SRLCALPQPALFAASL                |
| 5 BmABCC1  | 25.2%  | WNLEKGPQATPETALQLEQITLYRPGEPALRDVICTVAPRDKLIVGRTGAGKSITLTLGFRITVEAAAGRIIDGVDIATLGLHQLRSRITITIPQEPILFSGITL                             |
| 6 BmABCC10 | 21.9%  | VDGE-SPPYGVWPSIGVVFEEDVHLNYSVRERA-----TAAICGVSITSWAGEKGVVGRTGAGKSSLLAALRLAPLSRGTVRVDGVVHKLHLHLSRSRIGVITPQEPFITSSGI                    |
|            |        |                                                                                                                                       |
| 1 BmABCC2  | 100.0% | RYNLDPFDSYSDDELWRALQVLEKEVIP---ALDYKSEGGSNFSVQQRQLVCLARAVLRSNKLIVMDEATANVDQTDALQTTIRREFASGVITITIAHRNTIMDSDRVLVMDKGV                   |
| 2 BmABCC3  | 51.4%  | RYNLDPFVSYSDDELWRALQVDMKAAPV---SLDKVTEGGSNFSVQQRQLMCLARAILRSNKLITMDEATANVDQTDNFIQOTRRAFASGVITITIAHRNTIMDSDRVLVMDSTGE                  |
| 3 BmABCC4  | 38.3%  | RYNLDPFDAYTDAETWTALQVLEKNTVT---SLSSSVASGGSNFSVQQRQLCLARAALARNRLVLDEATANVDQTDALQKSTIRKHAADGVVTVIAHRLHTVADSDRVVMEAGQ                    |
| 4 BmABCC11 | 32.4%  | RDNLDPTHSATDAQIYAALQVLELDLVSSLPAGNTKLGDDGGSLSSQQRQLCLARAALAGSSVLLDEATANVDITEPKQIQRTIRTKFSNATVLTITIAHRNTIVMDYDRIVVMDKGR                |
| 5 BmABCC1  | 25.2%  | RSNLDPFAYSDDELWRALFAHLRAFVQGLPAGRHEVAEGGENSVQQRQLVCLARALLKPTPLLVLDEATAAVDLETDITLQKTRSEFASGVLTITIAHRNTIMDSKVMVLDRGQ                    |
| 6 BmABCC10 | 21.9%  | RENVDPLROYSETVWRALACGVDRDAVS-ARGGHIHSAAS---LSRGIAQLCTRALLQRAKVLVDEATANQDQTERLIDTIRCSFSGATVLFVAHRLAGVLECSRLVVLGGQK                     |
|            |        |                                                                                                                                       |
| 1 BmABCC2  | 100.0% | VAEYDTPYALLSDPNSIFSSMVRETGDI NSKVLFRVAEDKHLGRNTEK-----                                                                                |
| 2 BmABCC3  | 51.4%  | VAEYDHPYILMSDPNSHLSSMVRETGEKNSLKLFEVAKDAYFQSNKENMR-----                                                                               |
| 3 BmABCC4  | 38.3%  | IVCGHPYELLKNDNGHESKMVKQLGPASEQSLRELARDAHAQHIOYVDADDQDKTK-----                                                                         |
| 4 BmABCC11 | 32.4%  | IVSGHPHELLTQSGPDQTRRTLLSKNQAPLAVPEECEGAVHRSRTYSEKSADSELEATGVKTLVQETGKETAAMLRAAAESYKTWLEKXKST-----                                     |
| 5 BmABCC1  | 25.2%  | LVYAAPQQLLNDKNSIFYSMAKDAGIVN-----                                                                                                     |
| 6 BmABCC10 | 21.9%  | VELRTPDDALSDDTSYFYNMLYAS-----                                                                                                         |

Supplementary Figure 8.
